# Supplementary material for: Integrated Analysis of mRNA and Non-coding RNA Transcriptome in Pepper (Capsicum chinense) Hybrid at Seedling and Flowering Stages
Source: Front Genet. 2021 Aug 20;12:685788. doi: 10.3389/fgene.2021.685788 (PMC8417703; doi:10.3389/fgene.2021.685788)
Supplement: Supplementary file 7 [file Data_Sheet_6.XLSX]

## Sheet: DE miRNA of HNCy01 vs. HNCc16
Supplementary Table 6. Information of DE miRNA of HNCy01 vs. HNCc16
sRNA	HNCy01_readcount	HNCc16_readcount	log2FoldChange	pval	padj
novel_112	26.8335	155.329	-1.776	0.019732	0.45779
novel_117	2.4382	18.7181	-1.888	0.017174	0.4427
novel_12	1046.43	356.057	1.3198	0.028017	0.47433
novel_161	11.3323	1.06178	1.7647	0.034016	0.47433
novel_2	7103.23	2851.47	1.1646	0.029577	0.47433
novel_21	195.927	1.2184	5.0568	4.1e-12	4.76e-10
novel_219	8.19608	0	2.5262	0.002528	0.09775
novel_222	8.86509	30.2159	-1.4408	0.025556	0.47433
novel_253	5.12059	479.192	-5.119	1.57e-14	3.65e-12
novel_262	73.1037	387.461	-1.9681	0.0023239	0.09775
novel_48	45.9082	1.45583	3.5673	9.92e-07	7.67e-05
novel_56	20.7761	74.3961	-1.4415	0.034757	0.47433
novel_83	6.45112	23.7509	-1.4777	0.029583	0.47433
sly-miR156a	235.339	67.9784	1.4268	0.034417	0.47433
sly-miR169c	0.270719	11.2735	-2.3918	0.0041086	0.13617
sly-miR171a	32.1205	120.178	-1.6257	0.0057175	0.16581
sly-miR482a	190.345	1118.97	-2.2389	4.82e-05	0.0027951

## Sheet: DE miRNA of HNCy01 vs. HNCc22
Supplementary Table 6. Information of DE miRNA of HNCy01 vs. HNCc22
sRNA	HNCy01_readcount	HNCc22_readcount	log2FoldChange	pval	padj
novel_111	5.20061	21.3844	-1.4753	0.031888	0.30641
novel_122	17.5812	2.47464	1.6163	0.03265	0.30641
novel_124	29.0742	1.97523	2.377	0.0012957	0.052693
novel_160	118.35	25.3354	1.5306	0.03091	0.30641
novel_163	15.0714	1.74026	1.9033	0.0098394	0.21826
novel_168	16.2287	1.87448	1.6531	0.030418	0.30641
novel_174	38.672	91.6032	-1.0743	0.039351	0.35239
novel_178	17.915	0	3.0957	4.55e-05	0.0027758
novel_205	1.13388	17.7976	-1.7476	0.022819	0.29351
novel_213	95.0357	26.9339	1.4421	0.020038	0.29351
novel_219	8.6532	43.8961	-1.8506	0.0028657	0.077693
novel_254	9.3556	1.05196	1.7495	0.020998	0.29351
novel_262	74.7073	0	4.6707	7.28e-11	1.78e-08
novel_266	0.88959	14.8192	-1.9073	0.012886	0.26202
novel_267	70.9992	397.509	-2.1837	1.23e-05	0.0014958
novel_48	48.138	125.724	-1.2004	0.020927	0.29351
novel_72	11.7476	91.8675	-1.6913	0.025262	0.29351
novel_74	65.0583	11.4877	1.6331	0.025092	0.29351
novel_83	6.76826	0	2.3482	0.0022224	0.067784
novel_84	10.2315	38.0626	-1.3605	0.049278	0.40079
novel_95	27.9361	3.75603	1.7795	0.01658	0.29351
sly-miR156d-5p	45.8743	17.0138	1.2224	0.023103	0.29351
sly-miR169c	0.29653	17.2377	-3.0938	2.68e-05	0.0021791
sly-miR171a	33.9383	185.048	-1.9654	0.0012131	0.052693
sly-miR391	408.426	110.883	1.4318	0.028326	0.30641
sly-miR395a	58.7596	191.493	-1.38	0.022371	0.29351
sly-miR396a-3p	202.642	645.452	-1.4694	0.0033371	0.081425
sly-miR396a-5p	1352.99	3420.34	-1.1331	0.040438	0.35239
sly-miR482a	199.561	710.998	-1.5934	0.0020469	0.067784
sly-miR6022	7.06249	0.600156	1.5564	0.04267	0.35902
