# Supplementary material for: Integrated Analysis of mRNA and Non-coding RNA Transcriptome in Pepper (Capsicum chinense) Hybrid at Seedling and Flowering Stages
Source: Front Genet. 2021 Aug 20;12:685788. doi: 10.3389/fgene.2021.685788 (PMC8417703; doi:10.3389/fgene.2021.685788)
Supplement: Supplementary file 12 [file Data_Sheet_11.XLSX]

## Sheet:  transcription factor
Supplementary Table 11. Information of DE mRNA encoding transcription factor
Gene_id	Subject_id	TF_family	Description	Number	Expression Pattern
					S-stage	F-stage
gene-BC332_06025	AT4G38070.1	bHLH family protein	Structural maintenance of chromosomes protein 4	213	Under-dominance	Under-dominance
gene-BC332_07237	Gh_D05G2531	bHLH family protein	hypothetical protein	213	Under-dominance	Under-dominance
gene-BC332_08630	Gh_D05G2531	bHLH family protein	Protein NETWORKED 3A	213	Under-dominance	Under-dominance
gene-BC332_09300	Achn158001	bHLH family protein	putate receptor-like protein kinase	213	Under-dominance	Under-dominance
gene-BC332_09335	Gh_A13G0768	bHLH family protein	putate pentatricopeptide repeat-containing protein%2C mitochondrial	213	Under-dominance	Under-dominance
gene-BC332_12590	Csa11g091210.1	bHLH family protein	Serine/threonine-protein kinase Aurora-3	213	Under-dominance	Under-dominance
gene-BC332_13287	OMERI07G19420.2	bHLH family protein	40S ribosomal protein S9	213	Under-dominance	Under-dominance
gene-BC332_16783	PK04509.1	bHLH family protein	Protein transport protein Sec61 subunit gamma-1	213	Under-dominance	Under-dominance
gene-BC332_17570	Do006942.1	bHLH family protein	40S ribosomal protein S8	213	Under-dominance	Under-dominance
gene-BC332_21295	Sobic.002G068100.2.p	bHLH family protein	hypothetical protein	213	Under-dominance	Under-dominance
gene-BC332_21386	KN538831.1_FGP018	bHLH family protein	hypothetical protein	213	Under-dominance	Under-dominance
gene-BC332_22196	kfl00190_0180	bHLH family protein	Heat shock 70 kDa protein%2C mitochondrial	213	Under-dominance	Under-dominance
gene-BC332_26979	Sme2.5_00169.1_g00018.1	bHLH family protein	Auxin efflux carrier component 1	213	Under-dominance	Under-dominance
gene-BC332_27741	411158	bHLH family protein	hypothetical protein	213	Under-dominance	Under-dominance
novel.272	Cotton_A_14075_BGI-A2_v1.0	bHLH family protein	- && - && -	213	Under-dominance	Under-dominance
gene-BC332_04373	SMil_00011498-RA_Salv	bHLH family protein	hypothetical protein	213	Under-dominance	Over-dominance
gene-BC332_06038	PGSC0003DMP400002559	bHLH family protein	Transcription factor PRE5	213	Under-dominance	Over-dominance
gene-BC332_22476	PGSC0003DMP400001390	bHLH family protein	hypothetical protein	213	Under-dominance	Over-dominance
gene-BC332_22663	GRMZM5G899865_P01	bHLH family protein	Auxin-response protein SAUR21	213	Under-dominance	Over-dominance
gene-BC332_22669	GRMZM5G899865_P01	bHLH family protein	Auxin-induced protein X10A	213	Under-dominance	Over-dominance
gene-BC332_29518	GRMZM5G899865_P01	bHLH family protein	Auxin-response protein SAUR20	213	Under-dominance	Over-dominance
gene-BC332_29567	GRMZM5G899865_P01	bHLH family protein	Auxin-response protein SAUR20	213	Under-dominance	Over-dominance
gene-BC332_29580	GRMZM5G899865_P01	bHLH family protein	Auxin-response protein SAUR24	213	Under-dominance	Over-dominance
gene-BC332_29873	GRMZM5G899865_P01	bHLH family protein	Auxin-response protein SAUR21	213	Under-dominance	Over-dominance
novel.4070	Tp57577_TGAC_v2_mRNA33215	bHLH family protein	- && O22822.1 RecName: Full=UDP-glycosyltransferase 74F2; AltName: Full=AtSGT1; AltName: Full=Salicylic acid glucosyltransferase 1 && PF00201:UDP-glucoronosyl and UDP-glucosyl transferase	213	Under-dominance	Over-dominance
gene-BC332_00358	Sopen01g032700.1	bHLH family protein	Replication factor C subunit 2	213	Under-dominance	Low-parental dominance
gene-BC332_04822	CA02g16250	bHLH family protein	hypothetical protein	213	Under-dominance	Low-parental dominance
gene-BC332_04924	PSME_00030216-RA	bHLH family protein	putate xyloglucan endotransglucosylase/hydrolase protein 8	213	Under-dominance	Low-parental dominance
gene-BC332_06162	ORUFI05G00210.1	bHLH family protein	hypothetical protein	213	Under-dominance	Low-parental dominance
gene-BC332_06456	Achn253811	bHLH family protein	60S ribosomal protein L13a-4	213	Under-dominance	Low-parental dominance
gene-BC332_09099	Aco009603.1	bHLH family protein	NAP1-related protein 2	213	Under-dominance	Low-parental dominance
gene-BC332_11350	Lus10023829	bHLH family protein	Ras-related protein Rab7	213	Under-dominance	Low-parental dominance
gene-BC332_12596	KZV15421.1	bHLH family protein	Acyl carrier protein 2%2C mitochondrial	213	Under-dominance	Low-parental dominance
gene-BC332_14831	Do006942.1	bHLH family protein	40S ribosomal protein S8	213	Under-dominance	Low-parental dominance
gene-BC332_15019	Lus10030581	bHLH family protein	hypothetical protein	213	Under-dominance	Low-parental dominance
gene-BC332_15155	676732396	bHLH family protein	Expansin-A4	213	Under-dominance	Low-parental dominance
gene-BC332_17178	OMERI07G19420.2	bHLH family protein	40S ribosomal protein S9	213	Under-dominance	Low-parental dominance
gene-BC332_18371	Peinf101Scf01093g11002.1	bHLH family protein	hypothetical protein	213	Under-dominance	Low-parental dominance
gene-BC332_22023	DCAR_031998	bHLH family protein	2-C-methyl-D-erythritol 4-phosphate cytidylyltransferase%2C chloroplastic	213	Under-dominance	Low-parental dominance
gene-BC332_22055	Csa03g029780.1	bHLH family protein	hypothetical protein	213	Under-dominance	Low-parental dominance
gene-BC332_22193	kfl00190_0180	bHLH family protein	Heat shock 70 kDa protein%2C mitochondrial	213	Under-dominance	Low-parental dominance
gene-BC332_22507	GRMZM5G899865_P01	bHLH family protein	hypothetical protein	213	Under-dominance	Low-parental dominance
gene-BC332_23456	OMERI07G19420.2	bHLH family protein	40S ribosomal protein S9	213	Under-dominance	Low-parental dominance
gene-BC332_24472	PDK_30s891671g001	bHLH family protein	hypothetical protein	213	Under-dominance	Low-parental dominance
gene-BC332_27428	CCG033096.1	bHLH family protein	Protein SLOW WALKER 1	213	Under-dominance	Low-parental dominance
gene-BC332_27822	OMERI07G19420.2	bHLH family protein	40S ribosomal protein S9	213	Under-dominance	Low-parental dominance
gene-BC332_31370	Achn253811	bHLH family protein	60S ribosomal protein L13a-4	213	Under-dominance	Low-parental dominance
gene-BC332_33226	FANhyb_rscf00000311.1.g00007.1	bHLH family protein	hypothetical protein	213	Under-dominance	Low-parental dominance
gene-BC332_33765	Sme2.5_00169.1_g00018.1	bHLH family protein	Auxin efflux carrier component 1	213	Under-dominance	Low-parental dominance
novel.1030	Araip.E31CJ	bHLH family protein	- && Q7XTT4.2 RecName: Full=Nucleolin 2; AltName: Full=Protein NUCLEOLIN LIKE 2 && PF00076:RNA recognition motif. (a.k.a. RRM, RBD, or RNP domain)	213	Under-dominance	Low-parental dominance
novel.3547	CCG033096.1	bHLH family protein	- && Q9LJN8.1 RecName: Full=Mitotic checkpoint protein BUB3.1; AltName: Full=Protein BUDDING UNINHIBITED BY BENZYMIDAZOL 3.1 && -	213	Under-dominance	Low-parental dominance
novel.4093	Do006942.1	bHLH family protein	- && P49199.2 RecName: Full=40S ribosomal protein S8 && -	213	Under-dominance	Low-parental dominance
novel.5609	OMERI03G11830.1	bHLH family protein	- && - && -	213	Under-dominance	Low-parental dominance
novel.7133	Peinf101Scf01093g11002.1	bHLH family protein	- && Q9LHP1.1 RecName: Full=60S ribosomal protein L7-4 && -	213	Under-dominance	Low-parental dominance
novel.7298	Cotton_A_00736_BGI-A2_v1.0	bHLH family protein	- && B5LMM1.1 RecName: Full=Photosystem II D2 protein; Short=PSII D2 protein; AltName: Full=Photosystem Q(A) protein && PF00124:Photosynthetic reaction centre protein|PF01737:YCF9	213	Under-dominance	Low-parental dominance
novel.957	Achn013161	bHLH family protein	- && Q8W034.1 RecName: Full=Heterogeneous nuclear ribonucleoprotein 1; Short=hnRNP1 && PF00076:RNA recognition motif. (a.k.a. RRM, RBD, or RNP domain)	213	Under-dominance	Low-parental dominance
gene-BC332_05525	Brast05G107300.1.p	bHLH family protein	Chloroplastic group IIA intron splicing facilitator CRS1%2C chloroplastic	213	Under-dominance	High-parental dominance
gene-BC332_06243	MDP0000254650	bHLH family protein	putate aldo-keto reductase 2	213	Under-dominance	High-parental dominance
gene-BC332_06244	MDP0000254650	bHLH family protein	putate aldo-keto reductase 2	213	Under-dominance	High-parental dominance
gene-BC332_06336	XP_009620076.1	bHLH family protein	hypothetical protein	213	Under-dominance	High-parental dominance
gene-BC332_12166	676732396	bHLH family protein	Expansin-A1	213	Under-dominance	High-parental dominance
gene-BC332_12527	Do007746.1	bHLH family protein	hypothetical protein	213	Under-dominance	High-parental dominance
gene-BC332_13481	Cotton_A_24931_BGI-A2_v1.0	bHLH family protein	hypothetical protein	213	Under-dominance	High-parental dominance
gene-BC332_19276	676732396	bHLH family protein	Expansin-B1	213	Under-dominance	High-parental dominance
gene-BC332_21007	Spipo14G0021700	bHLH family protein	hypothetical protein	213	Under-dominance	High-parental dominance
gene-BC332_22461	MELO3C019736P1	bHLH family protein	Cyclase-associated protein 1	213	Under-dominance	High-parental dominance
gene-BC332_22506	GRMZM5G899865_P01	bHLH family protein	Auxin-induced protein 15A	213	Under-dominance	High-parental dominance
gene-BC332_24770	OPUNC07G16850.2	bHLH family protein	putate V-type proton ATPase subunit H	213	Under-dominance	High-parental dominance
gene-BC332_26401	Bradi2g44117.9.p	bHLH family protein	Protein LUTEIN DEFICIENT 5%2C chloroplastic	213	Under-dominance	High-parental dominance
gene-BC332_29274	Do007746.1	bHLH family protein	hypothetical protein	213	Under-dominance	High-parental dominance
gene-BC332_32697	GRMZM5G899865_P01	bHLH family protein	Auxin-response protein SAUR32	213	Under-dominance	High-parental dominance
gene-BC332_32988	GSMUA_Achr10P17130_001	bHLH family protein	Chaperone protein DnaJ	213	Under-dominance	High-parental dominance
gene-BC332_25659	Spipo14G0021700	bHLH family protein	RNA polymerase sigma factor sigB	213	Under-dominance	Additivity
novel.6401	Sp_000340_siic.t1	bHLH family protein	- && Q6AVI0.1 RecName: Full=Zinc finger BED domain-containing protein RICESLEEPER 2; AltName: Full=Transposase-like protein RICESLEEPER 2 && PF05699:hAT family C-terminal dimerisation region	213	Under-dominance	Additivity
gene-BC332_31397	Csa11g091210.1	bHLH family protein	CBL-interacting serine/threonine-protein kinase 1	213	Over-dominance	Over-dominance
novel.4470	MDP0000320739	bHLH family protein	- && Q7XTV7.2 RecName: Full=Probable E3 ubiquitin-protein ligase HIP1; AltName: Full=HAL3-interacting protein 1; Short=OsHIP1; AltName: Full=RING-H2 finger HIP1 && PF13639:Ring finger domain	213	Over-dominance	Over-dominance
gene-BC332_04891	CA02g17470	bHLH family protein	Transcription factor	213	Over-dominance	Over-dominance
gene-BC332_08118	Zmw_sc02382.1.g00020.1	bHLH family protein	Oxalate--CoA ligase	213	Over-dominance	Over-dominance
gene-BC332_08321	Lus10038823	bHLH family protein	RNA polymerase sigma factor sigE%2C chloroplastic/mitochondrial	213	Over-dominance	Over-dominance
gene-BC332_09311	Kalax.0054s0081.2.p	bHLH family protein	ADP-ribosylation factor GTPase-actating protein AGD3	213	Over-dominance	Over-dominance
gene-BC332_18629	CA07g06670	bHLH family protein	Transcription factor PIF1	213	Over-dominance	Over-dominance
gene-BC332_19624	Bradi2g44117.9.p	bHLH family protein	Cytochrome	213	Over-dominance	Over-dominance
novel.7213	29780.m001358	bHLH family protein	- && Q9FYJ6.1 RecName: Full=Transcription factor bHLH111; AltName: Full=Basic hel-loop-hel protein 111; Short=AtbHLH111; Short=bHLH 111; AltName: Full=Transcription factor EN 66; AltName: Full=bHLH transcription factor bHLH111 && -	213	Over-dominance	Over-dominance
gene-BC332_27083	Do007746.1	bHLH family protein	U-box domain-containing protein 10	213	Over-dominance	Low-parental dominance
gene-BC332_07531	KN538909.1_FGP014	bHLH family protein	PAP-specific phosphatase HAL2-like	213	Over-dominance	Low-parental dominance
gene-BC332_16145	CA06g15210	bHLH family protein	Transcription factor bHLH80	213	Over-dominance	Low-parental dominance
gene-BC332_17304	Sopen12g030120.2	bHLH family protein	hypothetical protein	213	Over-dominance	Low-parental dominance
gene-BC332_20658	kfl00190_0180	bHLH family protein	Heat shock 70 kDa protein 7%2C chloroplastic	213	Over-dominance	Low-parental dominance
gene-BC332_20659	kfl00190_0180	bHLH family protein	Stromal 70 kDa heat shock-related protein%2C chloroplastic	213	Over-dominance	Low-parental dominance
gene-BC332_22395	mrna09125.1-v1.0-hybrid	bHLH family protein	putate receptor protein kinase TMK1	213	Over-dominance	Low-parental dominance
gene-BC332_32004	Do007746.1	bHLH family protein	E3 ubiquitin-protein ligase PUB22	213	Over-dominance	Low-parental dominance
gene-BC332_27225	312791	bHLH family protein	hypothetical protein	213	Over-dominance	High-parental dominance
gene-BC332_27227	312791	bHLH family protein	hypothetical protein	213	Over-dominance	High-parental dominance
gene-BC332_19503	Bradi2g44117.9.p	bHLH family protein	Cytochrome	213	Over-dominance	High-parental dominance
gene-BC332_30912	Do007746.1	bHLH family protein	U-box domain-containing protein 4	213	Over-dominance	High-parental dominance
novel.2278	Sopen12g030120.1	bHLH family protein	- && - && -	213	Over-dominance	High-parental dominance
novel.4671	Tp57577_TGAC_v2_mRNA34811	bHLH family protein	- && - && PF07727:Reverse transcriptase (RNA-dependent DNA polymerase)	213	Over-dominance	High-parental dominance
gene-BC332_00388	CA01g03980	bHLH family protein	Transcription factor bHLH35	213	Over-dominance	High-parental dominance
gene-BC332_00667	Sp_159490_wski.t1	bHLH family protein	Expansin-like B1	213	Over-dominance	High-parental dominance
gene-BC332_00696	Sp_159490_wski.t1	bHLH family protein	Expansin-like B1	213	Over-dominance	High-parental dominance
gene-BC332_07437	CA03g14140	bHLH family protein	hypothetical protein	213	Over-dominance	High-parental dominance
gene-BC332_08342	AHYPO_019315-RA	bHLH family protein	Cyclic nucleotide-gated ion channel 1	213	Over-dominance	High-parental dominance
gene-BC332_11769	SMil_00011498-RA_Salv	bHLH family protein	G-type lectin S-receptor-like serine/threonine-protein kinase	213	Over-dominance	High-parental dominance
gene-BC332_13550	AHYPO_019315-RA	bHLH family protein	Cyclic nucleotide-gated ion channel 1	213	Over-dominance	High-parental dominance
gene-BC332_13984	Csa11g091210.1	bHLH family protein	CBL-interacting serine/threonine-protein kinase 1	213	Over-dominance	High-parental dominance
gene-BC332_14071	GSMUA_Achr10P17130_001	bHLH family protein	Chaperone protein dnaJ 20%2C chloroplastic	213	Over-dominance	High-parental dominance
gene-BC332_14634	XP_016498898.1	bHLH family protein	hypothetical protein	213	Over-dominance	High-parental dominance
gene-BC332_14771	XP_016498898.1	bHLH family protein	hypothetical protein	213	Over-dominance	High-parental dominance
gene-BC332_15405	mrna09125.1-v1.0-hybrid	bHLH family protein	G-type lectin S-receptor-like serine/threonine-protein kinase	213	Over-dominance	High-parental dominance
gene-BC332_17305	676732396	bHLH family protein	Expansin-A6	213	Over-dominance	High-parental dominance
gene-BC332_17804	XP_009596056.1	bHLH family protein	Transcription factor bHLH66	213	Over-dominance	High-parental dominance
gene-BC332_18423	Seita.5G004700.1.p	bHLH family protein	hypothetical protein	213	Over-dominance	High-parental dominance
gene-BC332_18652	PGSC0003DMP400050144	bHLH family protein	Transcription factor SCREAM2	213	Over-dominance	High-parental dominance
gene-BC332_19688	Bradi2g44117.9.p	bHLH family protein	Cytochrome	213	Over-dominance	High-parental dominance
gene-BC332_25121	GRMZM5G899865_P01	bHLH family protein	Auxin-response protein SAUR15	213	Over-dominance	High-parental dominance
gene-BC332_26033	WALNUT_00030817-RA	bHLH family protein	CBS domain-containing protein CBSCBSPB1	213	Over-dominance	High-parental dominance
gene-BC332_31045	RrC3268_p2	bHLH family protein	CSC1-like protein RXW8	213	Over-dominance	High-parental dominance
gene-BC332_33450	Bradi2g44117.9.p	bHLH family protein	Secologanin synthase	213	Over-dominance	High-parental dominance
novel.2710	Tp57577_TGAC_v2_mRNA33215	bHLH family protein	- && P56725.1 RecName: Full=Zeatin O-xylosyltransferase; AltName: Full=Zeatin O-beta-D-xylosyltransferase && PF00201:UDP-glucoronosyl and UDP-glucosyl transferase	213	Over-dominance	High-parental dominance
novel.2895	Tp57577_TGAC_v2_mRNA33215	bHLH family protein	- && P56725.1 RecName: Full=Zeatin O-xylosyltransferase; AltName: Full=Zeatin O-beta-D-xylosyltransferase && PF00201:UDP-glucoronosyl and UDP-glucosyl transferase	213	Over-dominance	High-parental dominance
novel.3275	Zmw_sc01355.1.g00120.1	bHLH family protein	- && Q9SG96.1 RecName: Full=RING-H2 finger protein ATL72; AltName: Full=RING-type E3 ubiquitin transferase ATL72 && PF13639:Ring finger domain	213	Over-dominance	High-parental dominance
novel.5975	Tp57577_TGAC_v2_mRNA33215	bHLH family protein	- && P56725.1 RecName: Full=Zeatin O-xylosyltransferase; AltName: Full=Zeatin O-beta-D-xylosyltransferase && PF00201:UDP-glucoronosyl and UDP-glucosyl transferase	213	Over-dominance	High-parental dominance
novel.7132	MDP0000320739	bHLH family protein	- && O49500.1 RecName: Full=E3 ubiquitin-protein ligase MBR2; AltName: Full=HAL3-interacting protein 1 homolog; Short=AtHIP1; AltName: Full=MED25-binding RING-H2 protein 2; AltName: Full=RING-H2 finger MBR2 && PF13639:Ring finger domain	213	Over-dominance	High-parental dominance
gene-BC332_05436	676747494	bHLH family protein	Cytochrome 84A1	213	Over-dominance	Additivity
gene-BC332_16262	Pbr035981.1	bHLH family protein	hypothetical protein	213	Over-dominance	Additivity
novel.5111	Kaladp0068s0096.6.p	bHLH family protein	- && Q5W7F2.1 RecName: Full=ADP-ribosylation factor GTPase-actating protein AGD3; Short=ARF GAP AGD3; AltName: Full=Protein ARF-GAP DOMAIN 3; Short=AtAGD3; AltName: Full=Protein FORKED 2; AltName: Full=Protein SCARFACE; AltName: Full=Protein VASCULAR NE	213	Low-parental dominance	Under-dominance
gene-BC332_21250	Jcr4S00223.20	bHLH family protein	Carbonic anhydrase%2C chloroplastic	213	Low-parental dominance	Over-dominance
gene-BC332_29521	GRMZM5G899865_P01	bHLH family protein	Auxin-response protein SAUR67	213	Low-parental dominance	Over-dominance
novel.4645	GRMZM5G899865_P01	bHLH family protein	- && P33081.1 RecName: Full=Auxin-induced protein 15A && PF02519:Auxin response protein	213	Low-parental dominance	Over-dominance
gene-BC332_06106	Tp57577_TGAC_v2_mRNA33215	bHLH family protein	hypothetical protein	213	Low-parental dominance	Low-parental dominance
gene-BC332_06397	676766070	bHLH family protein	hypothetical protein	213	Low-parental dominance	Low-parental dominance
gene-BC332_31890	MDP0000304669	bHLH family protein	Aspartokinase 3%2C chloroplastic	213	Low-parental dominance	Low-parental dominance
gene-BC332_33311	mrna32536.1-v1.0-hybrid	bHLH family protein	hypothetical protein	213	Low-parental dominance	Low-parental dominance
novel.4157	Sopen12g030120.1	bHLH family protein	- && - && -	213	Low-parental dominance	Low-parental dominance
novel.7479	Pavir.8KG201300.1.p	bHLH family protein	- && - && -	213	Low-parental dominance	Low-parental dominance
gene-BC332_14726	Bradi2g44117.9.p	bHLH family protein	Cytochrome 97B3%2C chloroplastic	213	Low-parental dominance	High-parental dominance
gene-BC332_18089	DCAR_003527	bHLH family protein	APO protein 2%2C chloroplastic	213	Low-parental dominance	High-parental dominance
gene-BC332_29517	GRMZM5G899865_P01	bHLH family protein	Auxin-response protein SAUR67	213	Low-parental dominance	High-parental dominance
gene-BC332_29584	GRMZM5G899865_P01	bHLH family protein	Auxin-response protein SAUR65	213	Low-parental dominance	High-parental dominance
novel.3815	Tp57577_TGAC_v2_mRNA33215	bHLH family protein	- && O64733.1 RecName: Full=UDP-glycosyltransferase 87A2 && PF00201:UDP-glucoronosyl and UDP-glucosyl transferase	213	Low-parental dominance	High-parental dominance
novel.503	Niben101Scf07030g08005.1	bHLH family protein	- && - && -	213	Low-parental dominance	High-parental dominance
novel.86	Sp_000340_siic.t1	bHLH family protein	- && P03010.1 RecName: Full=Putate AC9 transposase && PF05699:hAT family C-terminal dimerisation region	213	Low-parental dominance	High-parental dominance
gene-BC332_16792	Zosma89g00630.1	bHLH family protein	hypothetical protein	213	Low-parental dominance	Additivity
gene-BC332_24183	Sp_000340_siic.t1	bHLH family protein	hypothetical protein	213	Low-parental dominance	Additivity
gene-BC332_29513	GRMZM5G899865_P01	bHLH family protein	Auxin-response protein SAUR67	213	Low-parental dominance	Additivity
novel.5141	RrC2300_p5	bHLH family protein	- && - && -	213	Low-parental dominance	Additivity
gene-BC332_01050	Ote100112080011	bHLH family protein	Pectin acetylesterase 8	213	High-parental dominance	Over-dominance
novel.5383	Sopen12g030120.2	bHLH family protein	- && Q69XJ4.1 RecName: Full=Heme oxygenase 1, chloroplastic; AltName: Full=Protein PHOTOPERIODIC SENSITITY 5; Flags: Precursor && -	213	High-parental dominance	Low-parental dominance
novel.7129	Tp57577_TGAC_v2_mRNA33215	bHLH family protein	- && Q9SYK9.1 RecName: Full=UDP-glycosyltransferase 74E2 && PF00201:UDP-glucoronosyl and UDP-glucosyl transferase	213	High-parental dominance	Low-parental dominance
gene-BC332_06403	676766070	bHLH family protein	hypothetical protein	213	High-parental dominance	High-parental dominance
gene-BC332_09830	Sopen12g030120.2	bHLH family protein	Gibberellin 3-beta-dioxygenase 1	213	High-parental dominance	High-parental dominance
gene-BC332_10593	Do007746.1	bHLH family protein	putate E3 ubiquitin-protein ligase LIN	213	High-parental dominance	High-parental dominance
gene-BC332_20044	SMil_00011498-RA_Salv	bHLH family protein	G-type lectin S-receptor-like serine/threonine-protein kinase	213	High-parental dominance	High-parental dominance
gene-BC332_20056	Sopen07g031930.1	bHLH family protein	Transcription factor	213	High-parental dominance	High-parental dominance
gene-BC332_23948	AHYPO_019315-RA	bHLH family protein	Cyclic nucleotide-gated ion channel 4	213	High-parental dominance	High-parental dominance
gene-BC332_30744	Kalax.0054s0081.2.p	bHLH family protein	ADP-ribosylation factor GTPase-actating protein AGD3	213	High-parental dominance	High-parental dominance
gene-BC332_34824	XP_016498898.1	bHLH family protein	hypothetical protein	213	High-parental dominance	High-parental dominance
novel.2828	Sp_000340_siic.t1	bHLH family protein	- && Q0JMB2.3 RecName: Full=Zinc finger BED domain-containing protein RICESLEEPER 4; AltName: Full=Transposase-like protein RICESLEEPER 4 && PF05699:hAT family C-terminal dimerisation region	213	High-parental dominance	High-parental dominance
novel.6599	Tp57577_TGAC_v2_mRNA33215	bHLH family protein	- && Q6VAB2.1 RecName: Full=UDP-glycosyltransferase 71E1 && PF00201:UDP-glucoronosyl and UDP-glucosyl transferase	213	High-parental dominance	High-parental dominance
gene-BC332_01408	XP_010101635.1	bHLH family protein	hypothetical protein	213	High-parental dominance	High-parental dominance
gene-BC332_08091	SMil_00011498-RA_Salv	bHLH family protein	hypothetical protein	213	High-parental dominance	High-parental dominance
gene-BC332_10251	NNU_010873-RA	bHLH family protein	hypothetical protein	213	High-parental dominance	High-parental dominance
gene-BC332_17159	Do007746.1	bHLH family protein	U-box domain-containing protein 4	213	High-parental dominance	High-parental dominance
gene-BC332_22597	Rsa1.0_00635.1_g00016.1	bHLH family protein	ATP synthase subunit beta%2C mitochondrial	213	High-parental dominance	High-parental dominance
gene-BC332_24525	Migut.K01050.1.p	bHLH family protein	hypothetical protein	213	High-parental dominance	High-parental dominance
gene-BC332_26278	XP_016498898.1	bHLH family protein	hypothetical protein	213	High-parental dominance	High-parental dominance
gene-BC332_28845	MDP0000249969	bHLH family protein	Ubiquitin-like modifier-actating enzyme atg7	213	High-parental dominance	High-parental dominance
gene-BC332_28926	Aradu.DZ0GE	bHLH family protein	hypothetical protein	213	High-parental dominance	High-parental dominance
gene-BC332_33538	XP_016498898.1	bHLH family protein	hypothetical protein	213	High-parental dominance	High-parental dominance
novel.7176	Sopen12g030120.2	bHLH family protein	- && - && -	213	High-parental dominance	High-parental dominance
gene-BC332_27311	XP_016498898.1	bHLH family protein	hypothetical protein	213	High-parental dominance	Additivity
gene-BC332_27321	XP_016498898.1	bHLH family protein	hypothetical protein	213	High-parental dominance	Additivity
gene-BC332_27374	XP_016498898.1	bHLH family protein	hypothetical protein	213	High-parental dominance	Additivity
gene-BC332_27658	XP_016498898.1	bHLH family protein	hypothetical protein	213	High-parental dominance	Additivity
gene-BC332_28115	XP_016498898.1	bHLH family protein	hypothetical protein	213	High-parental dominance	Additivity
gene-BC332_28485	MDP0000291132	bHLH family protein	L-idonate 5-dehydrogenase	213	High-parental dominance	Additivity
gene-BC332_34355	XP_016498898.1	bHLH family protein	hypothetical protein	213	High-parental dominance	Additivity
novel.6292	Sopen12g030120.2	bHLH family protein	- && - && -	213	High-parental dominance	Additivity
novel.7647	Sopen12g030120.2	bHLH family protein	- && - && -	213	High-parental dominance	Additivity
novel.803	Sopen12g030120.1	bHLH family protein	- && O64733.1 RecName: Full=UDP-glycosyltransferase 87A2 && PF00201:UDP-glucoronosyl and UDP-glucosyl transferase	213	High-parental dominance	Additivity
gene-BC332_05491	Sopen12g030120.2	bHLH family protein	hypothetical protein	213	High-parental dominance	Additivity
gene-BC332_32062	XP_016498898.1	bHLH family protein	hypothetical protein	213	High-parental dominance	Additivity
gene-BC332_33539	XP_016498898.1	bHLH family protein	hypothetical protein	213	High-parental dominance	Additivity
gene-BC332_33948	XP_016498898.1	bHLH family protein	hypothetical protein	213	High-parental dominance	Additivity
novel.2272	Sp_000340_siic.t1	bHLH family protein	- && Q0JMB2.3 RecName: Full=Zinc finger BED domain-containing protein RICESLEEPER 4; AltName: Full=Transposase-like protein RICESLEEPER 4 && PF05699:hAT family C-terminal dimerisation region	213	High-parental dominance	Additivity
novel.791	mrna28320.1-v1.0-hybrid	bHLH family protein	- && Q9LFD5.1 RecName: Full=Binding partner of ACD11 1 && PF00076:RNA recognition motif. (a.k.a. RRM, RBD, or RNP domain)	213	High-parental dominance	Additivity
gene-BC332_05057	676755044	bHLH family protein	putate polyamine oxidase 4	213	Additivity	Low-parental dominance
novel.4859	PSME_00030216-RA	bHLH family protein	- && Q9ZVK1.1 RecName: Full=Probable xyloglucan endotransglucosylase/hydrolase protein 10; Short=At-XTH10; Short=XTH-10; Flags: Precursor && PF00722:Glycosyl hydrolases family 16|PF06955:Xyloglucan endo-transglycosylase (XET) C-terminus	213	Additivity	Low-parental dominance
gene-BC332_06684	XP_016498898.1	bHLH family protein	hypothetical protein	213	Additivity	High-parental dominance
gene-BC332_12653	Rsa1.0_00048.1_g00027.1	bHLH family protein	Isoflavone reductase-like protein	213	Additivity	High-parental dominance
gene-BC332_15959	Rsa1.0_00048.1_g00027.1	bHLH family protein	Bifunctional pinoresinol-lariciresinol reductase	213	Additivity	High-parental dominance
gene-BC332_20771	Bradi2g44117.9.p	bHLH family protein	Cytochrome	213	Additivity	High-parental dominance
gene-BC332_22495	mrna15187.1-v1.0-hybrid	bHLH family protein	Phosphatidylinositol/phosphatidylcholine transfer protein SFH8	213	Additivity	High-parental dominance
gene-BC332_23126	Zjn_sc00004.1.g01770.1.am.mk	bHLH family protein	hypothetical protein	213	Additivity	High-parental dominance
gene-BC332_25319	Oropetium_20150105_04560A	bHLH family protein	hypothetical protein	213	Additivity	High-parental dominance
gene-BC332_27316	XP_016498898.1	bHLH family protein	hypothetical protein	213	Additivity	High-parental dominance
gene-BC332_27324	XP_016498898.1	bHLH family protein	hypothetical protein	213	Additivity	High-parental dominance
gene-BC332_27518	CA00g16330	bHLH family protein	hypothetical protein	213	Additivity	High-parental dominance
gene-BC332_31350	XP_016498898.1	bHLH family protein	Late blight resistance protein R1-A	213	Additivity	High-parental dominance
novel.1931	OB04G32400.1	bHLH family protein	- && - && -	213	Additivity	High-parental dominance
novel.3341	Sp_000340_siic.t1	bHLH family protein	- && Q6AVI0.1 RecName: Full=Zinc finger BED domain-containing protein RICESLEEPER 2; AltName: Full=Transposase-like protein RICESLEEPER 2 && PF05699:hAT family C-terminal dimerisation region	213	Additivity	High-parental dominance
gene-BC332_08195	OB04G32400.1	bHLH family protein	hypothetical protein	213	Additivity	Additivity
gene-BC332_09789	Seita.6G063700.1.p	bHLH family protein	Adenosylhomocysteinase	213	Additivity	Additivity
gene-BC332_14245	Tp57577_TGAC_v2_mRNA34811	bHLH family protein	hypothetical protein	213	Additivity	Additivity
gene-BC332_15060	mrna28785.1-v1.0-hybrid	bHLH family protein	putate aldo-keto reductase 1	213	Additivity	Additivity
gene-BC332_26773	XP_016498898.1	bHLH family protein	hypothetical protein	213	Additivity	Additivity
gene-BC332_27101	Migut.K01050.1.p	bHLH family protein	hypothetical protein	213	Additivity	Additivity
gene-BC332_27317	XP_016498898.1	bHLH family protein	hypothetical protein	213	Additivity	Additivity
novel.176	Sp_000340_siic.t1	bHLH family protein	- && P08770.2 RecName: Full=Putate AC transposase; AltName: Full=ORFA && PF02892:BED zinc finger|PF14372:Domain of unknown function (DUF4413)|PF05699:hAT family C-terminal dimerisation region	213	Additivity	Additivity
novel.1877	676739666	bHLH family protein	- && - && -	213	Additivity	Additivity
novel.3345	Sp_000340_siic.t1	bHLH family protein	- && P08770.2 RecName: Full=Putate AC transposase; AltName: Full=ORFA && PF14372:Domain of unknown function (DUF4413)|PF05699:hAT family C-terminal dimerisation region	213	Additivity	Additivity
novel.6789	Sp_000340_siic.t1	bHLH family protein	- && P03010.1 RecName: Full=Putate AC9 transposase && PF05699:hAT family C-terminal dimerisation region|PF14372:Domain of unknown function (DUF4413)|PF02892:BED zinc finger	213	Additivity	Additivity
novel.7292	mrna15187.1-v1.0-hybrid	bHLH family protein	- && Q9FWS6.1 RecName: Full=Bifunctional nuclease 1; Short=AtBBD1 && -	213	Additivity	Additivity
gene-BC332_02332	XP_013614924.1	MYB_related family protein	DNA topoisomerase 2	176	Under-dominance	Under-dominance
gene-BC332_04086	Tp1g05870	MYB_related family protein	Protein CHUP1%2C chloroplastic	176	Under-dominance	Under-dominance
gene-BC332_06558	EMT20798	MYB_related family protein	Salicylate carboxymethyltransferase	176	Under-dominance	Under-dominance
gene-BC332_07269	mrna28104.1-v1.0-hybrid	MYB_related family protein	Non-specific lipid-transfer protein	176	Under-dominance	Under-dominance
gene-BC332_08194	XP_009122937.1	MYB_related family protein	hypothetical protein	176	Under-dominance	Under-dominance
gene-BC332_08992	XP_009122937.1	MYB_related family protein	hypothetical protein	176	Under-dominance	Under-dominance
gene-BC332_11801	XP_009122937.1	MYB_related family protein	hypothetical protein	176	Under-dominance	Under-dominance
gene-BC332_12518	Zjn_sc00020.1.g02760.1.am.mk	MYB_related family protein	hypothetical protein	176	Under-dominance	Under-dominance
gene-BC332_15087	GRMZM2G008647_P02	MYB_related family protein	Protein disulfide-isomerase	176	Under-dominance	Under-dominance
gene-BC332_15312	PH01001490G0340	MYB_related family protein	L-ascorbate peroxidase 1%2C cytosolic	176	Under-dominance	Under-dominance
gene-BC332_15834	GRMZM2G008647_P02	MYB_related family protein	Protein disulfide-isomerase	176	Under-dominance	Under-dominance
gene-BC332_17569	Pahal.F00649.1	MYB_related family protein	70 kDa peptidyl-prolyl isomerase	176	Under-dominance	Under-dominance
gene-BC332_19997	Araip.YX9Q9	MYB_related family protein	Kinesin-1	176	Under-dominance	Under-dominance
gene-BC332_21977	Araip.YX9Q9	MYB_related family protein	hypothetical protein	176	Under-dominance	Under-dominance
gene-BC332_22909	XP_009122937.1	MYB_related family protein	hypothetical protein	176	Under-dominance	Under-dominance
gene-BC332_23331	XP_009122937.1	MYB_related family protein	hypothetical protein	176	Under-dominance	Under-dominance
gene-BC332_25945	XP_009122937.1	MYB_related family protein	hypothetical protein	176	Under-dominance	Under-dominance
gene-BC332_26468	Pbr019774.1	MYB_related family protein	putate kDa kinesin-related protein	176	Under-dominance	Under-dominance
gene-BC332_28422	EMT28005	MYB_related family protein	Ubiquitin-conjugating enzyme E2 20	176	Under-dominance	Under-dominance
gene-BC332_29699	Araip.YX9Q9	MYB_related family protein	Kinesin-4	176	Under-dominance	Under-dominance
gene-BC332_29763	mrna19228.1-v1.0-hybrid	MYB_related family protein	putate protease Do-like 3%2C mitochondrial	176	Under-dominance	Under-dominance
gene-BC332_32338	GRMZM2G008647_P02	MYB_related family protein	putate protein disulfide-isomerase A6	176	Under-dominance	Under-dominance
novel.1286	Araip.YX9Q9	MYB_related family protein	- && Q8VWI7.1 RecName: Full=Kinesin-like protein KIN-10A; AltName: Full=Phragmoplast-associated kinesin-related protein 2; Short=AtPAKRP2 && PF00225:Kinesin motor domain	176	Under-dominance	Under-dominance
novel.1352	mrna28104.1-v1.0-hybrid	MYB_related family protein	- && Q43129.1 RecName: Full=Non-specific lipid-transfer protein; Short=LTP; AltName: Full=GH3; Flags: Precursor && -	176	Under-dominance	Under-dominance
novel.1643	PSME_00022781-RA	MYB_related family protein	- && - && -	176	Under-dominance	Under-dominance
novel.4083	GSBRNA2T00144433001	MYB_related family protein	- && - && -	176	Under-dominance	Under-dominance
gene-BC332_08309	EMT28005	MYB_related family protein	hypothetical protein	176	Under-dominance	Over-dominance
gene-BC332_19810	Sp_073850_Low-parental dominancemz.t1	MYB_related family protein	putate amino acid permease 7	176	Under-dominance	Over-dominance
gene-BC332_29841	PK12308.1	MYB_related family protein	Phosphoglycolate phosphatase 1A%2C chloroplastic	176	Under-dominance	Over-dominance
novel.2259	PH01001490G0340	MYB_related family protein	- && Q9THX6.1 RecName: Full=Thylakoid lumenal 29 kDa protein, chloroplastic; Short=TL29; AltName: Full=LeAPx09; AltName: Full=P29; Flags: Precursor && PF00141:Peroxidase	176	Under-dominance	Over-dominance
gene-BC332_01240	Sobic.010G025850.4.p	MYB_related family protein	hypothetical protein	176	Under-dominance	Low-parental dominance
gene-BC332_06114	KN539116.1_FGP007	MYB_related family protein	hypothetical protein	176	Under-dominance	Low-parental dominance
gene-BC332_08654	Achn077281	MYB_related family protein	Ubiquitin-60S ribosomal protein L40-2	176	Under-dominance	Low-parental dominance
gene-BC332_09020	Do008764.1	MYB_related family protein	H/ACA ribonucleoprotein complex subunit 2-like protein	176	Under-dominance	Low-parental dominance
gene-BC332_12726	Araip.L7DK0	MYB_related family protein	hypothetical protein	176	Under-dominance	Low-parental dominance
gene-BC332_15651	Achn077281	MYB_related family protein	Ubiquitin-60S ribosomal protein L40-2	176	Under-dominance	Low-parental dominance
gene-BC332_16230	Gh_A05G1133	MYB_related family protein	Glycylpeptide N-tetradecanoyltransferase 2	176	Under-dominance	Low-parental dominance
gene-BC332_16554	CA06g18030	MYB_related family protein	DNA mismatch repair protein MSH2	176	Under-dominance	Low-parental dominance
gene-BC332_17275	KN538684.1_FGP011	MYB_related family protein	Protein STRICTOSIDINE SYNTHASE-LIKE 3	176	Under-dominance	Low-parental dominance
gene-BC332_17366	OGLUM01G41620.1	MYB_related family protein	Cell dision control protein 6 -like protein	176	Under-dominance	Low-parental dominance
gene-BC332_22435	PH01000508G0070	MYB_related family protein	hypothetical protein	176	Under-dominance	Low-parental dominance
gene-BC332_23160	FANhyb_rscf00000065.1.g00001.1	MYB_related family protein	60S ribosomal protein L4	176	Under-dominance	Low-parental dominance
gene-BC332_25840	Do008764.1	MYB_related family protein	NHP2-like protein 1	176	Under-dominance	Low-parental dominance
gene-BC332_25957	FANhyb_rscf00000065.1.g00001.1	MYB_related family protein	60S ribosomal protein L4	176	Under-dominance	Low-parental dominance
gene-BC332_25968	Aradu.UH16H	MYB_related family protein	hypothetical protein	176	Under-dominance	Low-parental dominance
gene-BC332_28791	KN538684.1_FGP011	MYB_related family protein	Protein STRICTOSIDINE SYNTHASE-LIKE 3	176	Under-dominance	Low-parental dominance
gene-BC332_29080	Zjn_sc00020.1.g02760.1.am.mk	MYB_related family protein	hypothetical protein	176	Under-dominance	Low-parental dominance
gene-BC332_31303	Lus10038846	MYB_related family protein	40S ribosomal protein S10	176	Under-dominance	Low-parental dominance
gene-BC332_32099	Lus10038846	MYB_related family protein	40S ribosomal protein S10	176	Under-dominance	Low-parental dominance
gene-BC332_33232	Zjn_sc00020.1.g02760.1.am.mk	MYB_related family protein	Heavy metal-associated isoprenylated plant protein 26	176	Under-dominance	Low-parental dominance
novel.2699	Peaxi162Scf01390g00031.1	MYB_related family protein	- && Q9FT97.1 RecName: Full=Alpha-galactosidase 1; Short=AtAGAL1; AltName: Full=Alpha-D-galactoside galactohydrolase 1; AltName: Full=Melibiase 1; Flags: Precursor && -	176	Under-dominance	Low-parental dominance
novel.624	MLOC_77437.1	MYB_related family protein	- && - && -	176	Under-dominance	Low-parental dominance
gene-BC332_05278	GRMZM2G320305_P01	MYB_related family protein	Ferredoxin--NADP reductase%2C chloroplastic	176	Under-dominance	High-parental dominance
gene-BC332_07116	Vradi05g12900.1	MYB_related family protein	hypothetical protein	176	Under-dominance	High-parental dominance
gene-BC332_09925	DCAR_007584	MYB_related family protein	NADP-dependent malic enzyme%2C chloroplastic	176	Under-dominance	High-parental dominance
gene-BC332_13682	Sme2.5_05369.1_g00001.1	MYB_related family protein	Potassium channel GORK	176	Under-dominance	High-parental dominance
gene-BC332_21769	Araip.YX9Q9	MYB_related family protein	hypothetical protein	176	Under-dominance	High-parental dominance
gene-BC332_22854	CCG025544.1	MYB_related family protein	Glucomannan 4-beta-mannosyltransferase 2	176	Under-dominance	High-parental dominance
novel.5504	maker-scaffold02338-snap-gene-0.27-mRNA-1	MYB_related family protein	- && - && -	176	Under-dominance	High-parental dominance
gene-BC332_00754	PSME_00044429-RA	MYB_related family protein	Abscisic acid receptor PYL1	176	Under-dominance	Additivity
novel.5303	Sme2.5_05369.1_g00001.1	MYB_related family protein	- && C0LGD7.2 RecName: Full=Probable LRR receptor-like serine/threonine-protein kinase At1g06840; Flags: Precursor && PF07714:Protein tyrosine kinase	176	Over-dominance	Over-dominance
gene-BC332_03654	BGIOSGA035841-PA	MYB_related family protein	BTB/POZ domain-containing protein	176	Over-dominance	Over-dominance
gene-BC332_10167	Itr_sc000748.1_g00024.1	MYB_related family protein	hypothetical protein	176	Over-dominance	Over-dominance
gene-BC332_20051	Itr_sc000748.1_g00024.1	MYB_related family protein	Receptor-like serine/threonine-protein kinase SD1-7	176	Over-dominance	Over-dominance
gene-BC332_30672	DCAR_007584	MYB_related family protein	NADP-dependent malic enzyme%2C chloroplastic	176	Over-dominance	Over-dominance
gene-BC332_31106	PSME_00044429-RA	MYB_related family protein	Abscisic acid receptor PYL3	176	Over-dominance	Over-dominance
gene-BC332_03251	EMT20798	MYB_related family protein	hypothetical protein	176	Over-dominance	Low-parental dominance
gene-BC332_05493	ONHigh-parental dominanceA02G03520.1	MYB_related family protein	ATP synthase subunit beta%2C mitochondrial	176	Over-dominance	Low-parental dominance
gene-BC332_08563	462864640	MYB_related family protein	Mitogen-actated protein kinase kinase 9	176	Over-dominance	Low-parental dominance
gene-BC332_09582	CA03g35440	MYB_related family protein	hypothetical protein	176	Over-dominance	Low-parental dominance
gene-BC332_12675	EMT28005	MYB_related family protein	Ubiquitin-conjugating enzyme E2 7	176	Over-dominance	Low-parental dominance
gene-BC332_22838	TRAES3BF061700120CFD_t1	MYB_related family protein	hypothetical protein	176	Over-dominance	Low-parental dominance
gene-BC332_26430	CA10g16610	MYB_related family protein	hypothetical protein	176	Over-dominance	Low-parental dominance
gene-BC332_29001	Sp_073850_Low-parental dominancemz.t1	MYB_related family protein	GABA transporter 1	176	Over-dominance	Low-parental dominance
gene-BC332_29142	CA11g18740	MYB_related family protein	hypothetical protein	176	Over-dominance	Low-parental dominance
novel.5830	Sme2.5_05369.1_g00001.1	MYB_related family protein	- && P93295.1 RecName: Full=Uncharacterized mitochondrial protein AtMg00310; AltName: Full=ORF154 && -	176	Over-dominance	Low-parental dominance
gene-BC332_20053	Itr_sc000748.1_g00024.1	MYB_related family protein	G-type lectin S-receptor-like serine/threonine-protein kinase	176	Over-dominance	High-parental dominance
gene-BC332_04876	Itr_sc000748.1_g00024.1	MYB_related family protein	G-type lectin S-receptor-like serine/threonine-protein kinase	176	Over-dominance	High-parental dominance
gene-BC332_17050	Sme2.5_00418.1_g00007.1	MYB_related family protein	ATP-binding cassette sub-family F member 2	176	Over-dominance	High-parental dominance
gene-BC332_19173	Itr_sc000748.1_g00024.1	MYB_related family protein	G-type lectin S-receptor-like serine/threonine-protein kinase	176	Over-dominance	High-parental dominance
novel.3782	Sme2.5_05369.1_g00001.1	MYB_related family protein	- && Q8RXN0.1 RecName: Full=ABC transporter G family member 11; Short=ABC transporter ABCG.11; Short=AtABCG11; AltName: Full=Protein CUTICULAR DEFECT AND ORGAN FUSION 1; AltName: Full=Protein DESPERADO; AltName: Full=Protein PERMEABLE LEAVES 1; AltName: F	176	Over-dominance	High-parental dominance
novel.7383	Sp_073850_Low-parental dominancemz.t1	MYB_related family protein	- && P92934.1 RecName: Full=Amino acid permease 6; AltName: Full=Amino acid transporter AAP6 && -	176	Over-dominance	High-parental dominance
gene-BC332_00785	CA00g61570	MYB_related family protein	Transcription factor MYB82	176	Over-dominance	High-parental dominance
gene-BC332_00921	Zjn_sc00020.1.g02760.1.am.mk	MYB_related family protein	hypothetical protein	176	Over-dominance	High-parental dominance
gene-BC332_03406	PGSC0003DMP400037187	MYB_related family protein	Protein REVEILLE 7-like	176	Over-dominance	High-parental dominance
gene-BC332_03859	MDP0000253370	MYB_related family protein	putate prolyl 4-hydroxylase 7	176	Over-dominance	High-parental dominance
gene-BC332_05080	CA02g18810	MYB_related family protein	Protein REVEILLE 2	176	Over-dominance	High-parental dominance
gene-BC332_05397	EMT20798	MYB_related family protein	hypothetical protein	176	Over-dominance	High-parental dominance
gene-BC332_10165	Itr_sc000748.1_g00024.1	MYB_related family protein	hypothetical protein	176	Over-dominance	High-parental dominance
gene-BC332_11452	Zjn_sc00020.1.g02760.1.am.mk	MYB_related family protein	Heavy metal-associated isoprenylated plant protein 26	176	Over-dominance	High-parental dominance
gene-BC332_14192	XP_009785792.1	MYB_related family protein	Telomere repeat-binding protein 5	176	Over-dominance	High-parental dominance
gene-BC332_16646	CA06g19450	MYB_related family protein	Transcription factor MYB1R1	176	Over-dominance	High-parental dominance
gene-BC332_19808	Sp_073850_Low-parental dominancemz.t1	MYB_related family protein	putate amino acid permease 7	176	Over-dominance	High-parental dominance
gene-BC332_19809	Sp_073850_Low-parental dominancemz.t1	MYB_related family protein	putate amino acid permease 7	176	Over-dominance	High-parental dominance
gene-BC332_20163	Itr_sc000748.1_g00024.1	MYB_related family protein	putate LRR receptor-like serine/threonine-protein kinase	176	Over-dominance	High-parental dominance
gene-BC332_20164	Itr_sc000748.1_g00024.1	MYB_related family protein	putate LRR receptor-like serine/threonine-protein kinase	176	Over-dominance	High-parental dominance
gene-BC332_21524	CA08g07630	MYB_related family protein	Protein REVEILLE 3	176	Over-dominance	High-parental dominance
gene-BC332_21901	OPUNC05G25400.1	MYB_related family protein	hypothetical protein	176	Over-dominance	High-parental dominance
gene-BC332_22592	Sp_073850_Low-parental dominancemz.t1	MYB_related family protein	Lysine histidine transporter-like 8	176	Over-dominance	High-parental dominance
gene-BC332_24632	PGSC0003DMP400000664	MYB_related family protein	Transcription factor DARICATA	176	Over-dominance	High-parental dominance
gene-BC332_25315	XP_016502131.1	MYB_related family protein	hypothetical protein	176	Over-dominance	High-parental dominance
gene-BC332_25408	EMT28005	MYB_related family protein	Ubiquitin-conjugating enzyme E2-17 kDa	176	Over-dominance	High-parental dominance
gene-BC332_25950	Zjn_sc00020.1.g02760.1.am.mk	MYB_related family protein	hypothetical protein	176	Over-dominance	High-parental dominance
gene-BC332_26256	XP_009600201.1	MYB_related family protein	Protein REVEILLE 6	176	Over-dominance	High-parental dominance
gene-BC332_27381	OPUNC05G25400.1	MYB_related family protein	Proline-rich receptor-like protein kinase PERK13	176	Over-dominance	High-parental dominance
gene-BC332_28208	Peaxi162Scf01390g00031.1	MYB_related family protein	hypothetical protein	176	Over-dominance	High-parental dominance
novel.3682	Achn202071	MYB_related family protein	- && F4HSX9.1 RecName: Full=Protein KINESIN LIGHT CHAIN-RELATED 3 && PF02271:Ubiquinol-cytochrome C reductase complex 14kD subunit|PF03859:CG-1 domain	176	Over-dominance	High-parental dominance
novel.3769	Sopen06g026850.1	MYB_related family protein	- && Q9LDD4.1 RecName: Full=AT-rich interacte domain-containing protein 2; Short=ARID domain-containing protein 2; AltName: Full=ARID and ELM2 domain-containing protein 2 && -	176	Over-dominance	High-parental dominance
gene-BC332_17307	PGSC0003DMP400052776	MYB_related family protein	Telomere repeat-binding protein 2	176	Over-dominance	Additivity
gene-BC332_14388	Zmw_sc01797.1.g00110.1	MYB_related family protein	hypothetical protein	176	Over-dominance	Additivity
gene-BC332_18926	Lus10007348	MYB_related family protein	putate xyloglucan endotransglucosylase/hydrolase protein 5	176	Low-parental dominance	Under-dominance
gene-BC332_08437	Zjn_sc00020.1.g02760.1.am.mk	MYB_related family protein	hypothetical protein	176	Low-parental dominance	Over-dominance
gene-BC332_09609	Sme2.5_05108.1_g00003.1	MYB_related family protein	hypothetical protein	176	Low-parental dominance	Over-dominance
gene-BC332_08636	Ote100209250011	MYB_related family protein	Small heat shock protein%2C chloroplastic	176	Low-parental dominance	Low-parental dominance
gene-BC332_14161	Zpz_sc02040.1.g00010.1.sm.mk	MYB_related family protein	hypothetical protein	176	Low-parental dominance	Low-parental dominance
gene-BC332_25623	PSME_00044429-RA	MYB_related family protein	Abscisic acid receptor PYL6	176	Low-parental dominance	Low-parental dominance
gene-BC332_28819	462864640	MYB_related family protein	Serine/threonine-protein kinase Nek5	176	Low-parental dominance	Low-parental dominance
novel.4396	EMT04248	MYB_related family protein	- && Q8L716.2 RecName: Full=Splicing factor U2af large subunit B; AltName: Full=U2 auxiliary factor 65 kDa subunit B; AltName: Full=U2 small nuclear ribonucleoprotein auxiliary factor large subunit B; Short=U2 snRNP auxiliary factor large subunit B && PF0	176	Low-parental dominance	Low-parental dominance
gene-BC332_00013	GSBRNA2T00073198001	MYB_related family protein	Soluble inorganic pyrophosphatase	176	Low-parental dominance	High-parental dominance
gene-BC332_04368	Itr_sc000748.1_g00024.1	MYB_related family protein	hypothetical protein	176	Low-parental dominance	High-parental dominance
gene-BC332_22472	CA00g64330	MYB_related family protein	hypothetical protein	176	Low-parental dominance	High-parental dominance
gene-BC332_23099	Zmw_sc01566.1.g00260.1	MYB_related family protein	Polygalacturonase inhibitor	176	Low-parental dominance	High-parental dominance
gene-BC332_24477	Zjn_sc00020.1.g02760.1.am.mk	MYB_related family protein	hypothetical protein	176	Low-parental dominance	High-parental dominance
gene-BC332_26743	Sme2.5_05369.1_g00001.1	MYB_related family protein	hypothetical protein	176	Low-parental dominance	High-parental dominance
gene-BC332_29000	CCG025544.1	MYB_related family protein	putate mannan synthase 9	176	Low-parental dominance	High-parental dominance
gene-BC332_29309	Zjn_sc00020.1.g02760.1.am.mk	MYB_related family protein	hypothetical protein	176	Low-parental dominance	High-parental dominance
novel.1096	Sme2.5_05369.1_g00001.1	MYB_related family protein	- && - && -	176	Low-parental dominance	High-parental dominance
novel.3161	Zmw_sc01797.1.g00110.1	MYB_related family protein	- && - && -	176	Low-parental dominance	High-parental dominance
gene-BC332_14141	Zmw_sc01797.1.g00110.1	MYB_related family protein	hypothetical protein	176	Low-parental dominance	Additivity
gene-BC332_14970	Rsa1.0_03996.1_g00001.1	MYB_related family protein	Pleiotropic drug resistance protein 3	176	Low-parental dominance	Additivity
novel.3426	Achn050491	MYB_related family protein	- && - && -	176	Low-parental dominance	Additivity
gene-BC332_08560	EMT20798	MYB_related family protein	hypothetical protein	176	High-parental dominance	Over-dominance
gene-BC332_06279	Rsa1.0_03996.1_g00001.1	MYB_related family protein	hypothetical protein	176	High-parental dominance	Low-parental dominance
gene-BC332_15632	CA06g22370	MYB_related family protein	Transcription factor MYB1R1	176	High-parental dominance	Low-parental dominance
gene-BC332_34031	Rsa1.0_03996.1_g00001.1	MYB_related family protein	hypothetical protein	176	High-parental dominance	Low-parental dominance
gene-BC332_34141	Achn077281	MYB_related family protein	Polyubiquitin	176	High-parental dominance	Low-parental dominance
novel.2418	Sme2.5_06000.1_g00003.1	MYB_related family protein	- && O82485.1 RecName: Full=Oligopeptide transporter 7; Short=AtOPT7 && PF04101:Glycosyltransferase family 28 C-terminal domain|PF03033:Glycosyltransferase family 28 N-terminal domain|PF03169:OPT oligopeptide transporter protein	176	High-parental dominance	Low-parental dominance
novel.5590	mrna28104.1-v1.0-hybrid	MYB_related family protein	- && P93224.1 RecName: Full=Non-specific lipid-transfer protein 2; Short=LTP 2; Flags: Precursor && -	176	High-parental dominance	Low-parental dominance
gene-BC332_04370	Itr_sc000748.1_g00024.1	MYB_related family protein	hypothetical protein	176	High-parental dominance	Low-parental dominance
novel.2288	CA04g16260	MYB_related family protein	- && Q7LHG5.2 RecName: Full=Transposon Ty3-I Gag-Pol polyprotein; AltName: Full=Gag3-Pol3; AltName: Full=Transposon Ty3-2 TYA-TYB polyprotein; Contains: RecName: Full=Capsid protein; Short=CA; AltName: Full=p24; Contains: RecName: Full=Spacer peptide p3;	176	High-parental dominance	Low-parental dominance
gene-BC332_00272	Sp_073850_Low-parental dominancemz.t1	MYB_related family protein	putate GABA transporter 2	176	High-parental dominance	High-parental dominance
gene-BC332_10052	Sp_073850_Low-parental dominancemz.t1	MYB_related family protein	Lysine histidine transporter 1	176	High-parental dominance	High-parental dominance
gene-BC332_33666	Rsa1.0_03996.1_g00001.1	MYB_related family protein	hypothetical protein	176	High-parental dominance	High-parental dominance
novel.568	MDP0000537549	MYB_related family protein	- && Q9SU91.1 RecName: Full=Probable acyl-[acyl-carrier-protein]--UDP-N-acetylglucosamine O-acyltransferase, mitochondrial; Short=UDP-N-acetylglucosamine acyltransferase; AltName: Full=Protein LIPID X A; Short=AtLpxA; Flags: Precursor && PF13720:Udp N-ace	176	High-parental dominance	High-parental dominance
novel.637	EMT33404	MYB_related family protein	- && Q2RAK2.1 RecName: Full=Pyruvate kinase 1, cytosolic; Short=OsPK1 >B8BJ39.1 RecName: Full=Pyruvate kinase 1, cytosolic; Short=OsPK1 && PF00224:Pyruvate kinase, barrel domain|PF02887:Pyruvate kinase, alpha/beta domain	176	High-parental dominance	High-parental dominance
gene-BC332_08087	CA06g18030	MYB_related family protein	DNA mismatch repair protein MSH3	176	High-parental dominance	High-parental dominance
gene-BC332_23901	EMT28005	MYB_related family protein	putate ubiquitin-conjugating enzyme E2 26	176	High-parental dominance	High-parental dominance
gene-BC332_32838	Medtr0036s0260.1	MYB_related family protein	putate zinc metalloprotease EGY3%2C chloroplastic	176	High-parental dominance	High-parental dominance
gene-BC332_34608	Araip.YX9Q9	MYB_related family protein	Kinesin KP1	176	High-parental dominance	High-parental dominance
novel.5815	Sme2.5_05369.1_g00001.1	MYB_related family protein	- && - && -	176	High-parental dominance	High-parental dominance
gene-BC332_10521	Achn077281	MYB_related family protein	hypothetical protein	176	High-parental dominance	Additivity
gene-BC332_17756	Itr_sc000748.1_g00024.1	MYB_related family protein	G-type lectin S-receptor-like serine/threonine-protein kinase	176	High-parental dominance	Additivity
gene-BC332_18140	Itr_sc000748.1_g00024.1	MYB_related family protein	hypothetical protein	176	High-parental dominance	Additivity
gene-BC332_18154	Itr_sc000748.1_g00024.1	MYB_related family protein	G-type lectin S-receptor-like serine/threonine-protein kinase	176	High-parental dominance	Additivity
gene-BC332_23158	PH01001490G0340	MYB_related family protein	L-ascorbate peroxidase 2%2C cytosolic	176	High-parental dominance	Additivity
gene-BC332_01710	Sme2.5_05369.1_g00001.1	MYB_related family protein	TMV resistance protein N	176	High-parental dominance	Additivity
gene-BC332_03494	FANhyb_rscf00000348.1.g00004.1	MYB_related family protein	putate prolyl 4-hydroxylase 9	176	High-parental dominance	Additivity
gene-BC332_32359	Achn077281	MYB_related family protein	Polyubiquitin	176	High-parental dominance	Additivity
novel.2512	OPUNC05G25400.1	MYB_related family protein	- && Q9ZUE0.2 RecName: Full=Proline-rich receptor-like protein kinase PERK12; AltName: Full=Proline-rich extensin-like receptor kinase 12; Short=AtPERK12; AltName: Full=Protein INFLORESCENCE GROWTH INHIBITOR 1 && PF00069:Protein kinase domain	176	Additivity	Low-parental dominance
novel.5750	Sme2.5_05369.1_g00001.1	MYB_related family protein	- && - && -	176	Additivity	Low-parental dominance
gene-BC332_04759	Achn111201	MYB_related family protein	putate PAP-specific phosphatase%2C mitochondrial	176	Additivity	High-parental dominance
gene-BC332_05585	OPUNC05G25400.1	MYB_related family protein	Nodulation receptor kinase	176	Additivity	High-parental dominance
gene-BC332_06040	Zmw_sc01566.1.g00260.1	MYB_related family protein	Polygalacturonase inhibitor	176	Additivity	High-parental dominance
gene-BC332_24018	Tp57577_TGAC_v2_mRNA8161	MYB_related family protein	hypothetical protein	176	Additivity	High-parental dominance
novel.2932	FANhyb_rscf00000065.1.g00001.1	MYB_related family protein	- && Q9SF40.1 RecName: Full=60S ribosomal protein L4-1; Short=L1 && -	176	Additivity	High-parental dominance
novel.4943	Sme2.5_05369.1_g00001.1	MYB_related family protein	- && - && -	176	Additivity	High-parental dominance
novel.6532	Sme2.5_05369.1_g00001.1	MYB_related family protein	- && Q9M350.2 RecName: Full=Gamma-tubulin complex component 4; Short=AtGCP4; Short=GCP-4 && PF04130:Spc97 / Spc98 family	176	Additivity	High-parental dominance
gene-BC332_01155	Sme2.5_05369.1_g00001.1	MYB_related family protein	ABC transporter C family member 1	176	Additivity	Additivity
gene-BC332_03841	EMT28005	MYB_related family protein	Ubiquitin-conjugating enzyme E2 2	176	Additivity	Additivity
gene-BC332_14159	Zmw_sc01797.1.g00110.1	MYB_related family protein	hypothetical protein	176	Additivity	Additivity
gene-BC332_14170	Zmw_sc01797.1.g00110.1	MYB_related family protein	hypothetical protein	176	Additivity	Additivity
gene-BC332_31006	EMT28005	MYB_related family protein	SUMO-conjugating enzyme UBC9	176	Additivity	Additivity
gene-BC332_34635	CA00g94850	MYB_related family protein	14 kDa zinc-binding protein	176	Additivity	Additivity
novel.2031	OGLUM01G41620.1	MYB_related family protein	- && Q8SAB7.1 RecName: Full=Guanine nucleotide exchange factor SPIKE 1 && -	176	Additivity	Additivity
novel.3231	Sme2.5_05369.1_g00001.1	MYB_related family protein	- && Q9FLP9.1 RecName: Full=GDP-L-galactose phosphorylase 2; AltName: Full=Protein VITAMIN C DEFECTE 5 && -	176	Additivity	Additivity
novel.6897	Itr_sc001764.1_g00003.1	MYB_related family protein	- && P92519.1 RecName: Full=Uncharacterized mitochondrial protein AtMg00810; AltName: Full=ORF240b && PF07727:Reverse transcriptase (RNA-dependent DNA polymerase)|PF13976:GAG-pre-integrase domain	176	Additivity	Additivity
gene-BC332_00521	MDP0000238851	ERF family protein	FAM10 family protein	128	Under-dominance	Under-dominance
gene-BC332_03212	XP_010105262.1	ERF family protein	Obg-like ATPase 1	128	Under-dominance	Under-dominance
gene-BC332_03217	Sopen11g017580.1	ERF family protein	hypothetical protein	128	Under-dominance	Under-dominance
gene-BC332_05303	EMT22546	ERF family protein	T-complex protein 1 subunit zeta	128	Under-dominance	Under-dominance
gene-BC332_14256	TRIUR3_18522-P1	ERF family protein	putate glutathione S-transferase DHAR4	128	Under-dominance	Under-dominance
gene-BC332_14512	GSVHigh-parental dominanceT01018226001	ERF family protein	DnaJ protein ERDJ3B	128	Under-dominance	Under-dominance
gene-BC332_15273	EMT22546	ERF family protein	T-complex protein 1 subunit theta	128	Under-dominance	Under-dominance
gene-BC332_29609	Zpz_sc02354.1.g00080.1.am.mk	ERF family protein	EH domain-containing protein 2	128	Under-dominance	Under-dominance
gene-BC332_29610	Zpz_sc02354.1.g00080.1.am.mk	ERF family protein	EH domain-containing protein 1	128	Under-dominance	Under-dominance
gene-BC332_02715	DCAR_013815	ERF family protein	Glucose-1-phosphate adenylyltransferase large subunit 1%2C chloroplastic	128	Under-dominance	Over-dominance
gene-BC332_23452	Bradi3g42627.5.p	ERF family protein	Chlorophyll a-b binding protein CP29.1%2C chloroplastic	128	Under-dominance	Over-dominance
gene-BC332_24373	Bradi3g42627.5.p	ERF family protein	Chlorophyll a-b binding protein 37%2C chloroplastic	128	Under-dominance	Over-dominance
novel.2018	440731	ERF family protein	- && F4I907.1 RecName: Full=Glyoxylate/succinic semialdehyde reductase 2, chloroplastic; Short=AtGLYR2; Short=AtGR2; Short=SSA reductase 2; Flags: Precursor && PF14833:NAD-binding of NADP-dependent 3-hydroxyisobutyrate dehydrogenase|PF03446:NAD binding do	128	Under-dominance	Over-dominance
novel.5940	Sopen11g017580.1	ERF family protein	- && - && -	128	Under-dominance	Over-dominance
gene-BC332_00018	Pbr002083.1	ERF family protein	Glucan endo-1%2C3-beta-glucosidase 11	128	Under-dominance	Low-parental dominance
gene-BC332_00646	RrC3821_p2	ERF family protein	hypothetical protein	128	Under-dominance	Low-parental dominance
gene-BC332_03534	KFK31601.1	ERF family protein	hypothetical protein	128	Under-dominance	Low-parental dominance
gene-BC332_05129	Rsa1.0_03034.1_g00001.1	ERF family protein	L-ascorbate oxidase -like protein	128	Under-dominance	Low-parental dominance
gene-BC332_06929	Sphfalx0091s0015.1.p	ERF family protein	hypothetical protein	128	Under-dominance	Low-parental dominance
gene-BC332_09104	KN538953.1_FGP014	ERF family protein	Glycine--tRNA ligase	128	Under-dominance	Low-parental dominance
gene-BC332_12033	EMT22546	ERF family protein	T-complex protein 1 subunit epsilon	128	Under-dominance	Low-parental dominance
gene-BC332_12829	KN538953.1_FGP014	ERF family protein	Glycine--tRNA ligase	128	Under-dominance	Low-parental dominance
gene-BC332_17054	EMT22546	ERF family protein	T-complex protein 1 subunit beta	128	Under-dominance	Low-parental dominance
gene-BC332_21543	Sopen11g017580.1	ERF family protein	hypothetical protein	128	Under-dominance	Low-parental dominance
gene-BC332_22876	Csa06g039080.1	ERF family protein	hypothetical protein	128	Under-dominance	Low-parental dominance
gene-BC332_25946	Sopen11g017580.1	ERF family protein	60S ribosomal protein L23a	128	Under-dominance	Low-parental dominance
gene-BC332_29072	EMT22546	ERF family protein	T-complex protein 1 subunit beta	128	Under-dominance	Low-parental dominance
gene-BC332_31625	Rsa1.0_03034.1_g00001.1	ERF family protein	L-ascorbate oxidase -like protein	128	Under-dominance	Low-parental dominance
gene-BC332_31722	XP_009771234.1	ERF family protein	hypothetical protein	128	Under-dominance	Low-parental dominance
gene-BC332_33888	GSBRNA2T00115180001	ERF family protein	Aspartate--tRNA ligase%2C cytoplasmic	128	Under-dominance	Low-parental dominance
gene-BC332_34917	Bradi3g42627.5.p	ERF family protein	Chlorophyll a-b binding protein 3C%2C chloroplastic	128	Under-dominance	Low-parental dominance
novel.4213	Itr_sc000795.1_g00005.1	ERF family protein	- && - && -	128	Under-dominance	Low-parental dominance
gene-BC332_04228	Bradi3g42627.5.p	ERF family protein	Chlorophyll a-b binding protein 3C%2C chloroplastic	128	Under-dominance	High-parental dominance
gene-BC332_04229	Bradi3g42627.5.p	ERF family protein	Chlorophyll a-b binding protein 3C%2C chloroplastic	128	Under-dominance	High-parental dominance
gene-BC332_04231	Bradi3g42627.5.p	ERF family protein	Chlorophyll a-b binding protein 3C%2C chloroplastic	128	Under-dominance	High-parental dominance
gene-BC332_04233	Bradi3g42627.5.p	ERF family protein	Chlorophyll a-b binding protein 3C%2C chloroplastic	128	Under-dominance	High-parental dominance
gene-BC332_04234	Bradi3g42627.5.p	ERF family protein	Chlorophyll a-b binding protein 3C%2C chloroplastic	128	Under-dominance	High-parental dominance
gene-BC332_04235	Bradi3g42627.5.p	ERF family protein	Chlorophyll a-b binding protein 3C%2C chloroplastic	128	Under-dominance	High-parental dominance
gene-BC332_10144	Bradi3g42627.5.p	ERF family protein	Chlorophyll a-b binding protein 3C%2C chloroplastic	128	Under-dominance	High-parental dominance
gene-BC332_10145	Bradi3g42627.5.p	ERF family protein	Chlorophyll a-b binding protein 3C%2C chloroplastic	128	Under-dominance	High-parental dominance
gene-BC332_13369	Achn350331	ERF family protein	Mitochondrial uncoupling protein 6	128	Under-dominance	High-parental dominance
gene-BC332_13685	CA05g11070	ERF family protein	Ethylene-response transcription factor 1B	128	Under-dominance	High-parental dominance
gene-BC332_13923	Prupe.3G009400.1.p	ERF family protein	Aquaporin PIP1-1	128	Under-dominance	High-parental dominance
gene-BC332_16666	Sopen11g017580.1	ERF family protein	Isochorismate synthase%2C chloroplastic	128	Under-dominance	High-parental dominance
gene-BC332_18053	Glyma.13G227100.1.p	ERF family protein	hypothetical protein	128	Under-dominance	High-parental dominance
gene-BC332_19822	Csa06g039080.1	ERF family protein	Fructose-bisphosphate aldolase%2C cytoplasmic isozyme	128	Under-dominance	High-parental dominance
gene-BC332_23060	Prupe.3G009400.1.p	ERF family protein	Aquaporin PIP2-1	128	Under-dominance	High-parental dominance
gene-BC332_26195	Sopen11g017580.1	ERF family protein	L-type lectin-domain containing receptor kinase S.4	128	Under-dominance	High-parental dominance
gene-BC332_29451	676755556	ERF family protein	Nud hydrolase 17%2C mitochondrial	128	Under-dominance	High-parental dominance
gene-BC332_31640	evm.TU.contig_30133.1	ERF family protein	putate beta-1%2C3-galactosyltransferase 2	128	Under-dominance	High-parental dominance
gene-BC332_04444	676766060	ERF family protein	putate indole-3-acetic acid-amido synthetase GH3.8	128	Over-dominance	Under-dominance
gene-BC332_11380	PSME_00043254-RA	ERF family protein	hypothetical protein	128	Over-dominance	Under-dominance
gene-BC332_11923	CA04g18380	ERF family protein	Ethylene-response transcription factor RAP2-1	128	Over-dominance	Over-dominance
gene-BC332_09206	GSMUA_Achr7P16060_001	ERF family protein	hypothetical protein	128	Over-dominance	Over-dominance
gene-BC332_11448	Cc01_g03550	ERF family protein	hypothetical protein	128	Over-dominance	Over-dominance
gene-BC332_12734	Bv5_101120_supk.t1	ERF family protein	Sugar transport protein 7	128	Over-dominance	Over-dominance
gene-BC332_16511	TRIUR3_04273-P1	ERF family protein	Cinnamoyl-CoA reductase 1	128	Over-dominance	Over-dominance
gene-BC332_18874	Lj5g3v1697360.1	ERF family protein	ATP-dependent 6-phosphofructokinase 3	128	Over-dominance	Over-dominance
gene-BC332_24925	EMT28879	ERF family protein	putate LRR receptor-like serine/threonine-protein kinase	128	Over-dominance	Over-dominance
gene-BC332_27380	Achn009241	ERF family protein	putate phospholipid-transporting ATPase 11	128	Over-dominance	Over-dominance
gene-BC332_12747	GSVHigh-parental dominanceT01018226001	ERF family protein	Chaperone protein dnaJ 2	128	Over-dominance	Low-parental dominance
gene-BC332_14011	GSVHigh-parental dominanceT01032785001	ERF family protein	Zinc transporter 6	128	Over-dominance	Low-parental dominance
gene-BC332_23677	XP_013601330.1	ERF family protein	hypothetical protein	128	Over-dominance	Low-parental dominance
gene-BC332_31969	SMil_00007993-RA_Salv	ERF family protein	hypothetical protein	128	Over-dominance	Low-parental dominance
gene-BC332_07589	Pbr002083.1	ERF family protein	hypothetical protein	128	Over-dominance	High-parental dominance
gene-BC332_26572	Kaladp0839s0004.1.p	ERF family protein	Cysteine-rich receptor-like protein kinase 25	128	Over-dominance	High-parental dominance
gene-BC332_27571	Sopen11g017580.1	ERF family protein	Chitin-binding lectin 1	128	Over-dominance	High-parental dominance
novel.1907	TRIUR3_11943-P1	ERF family protein	- && F4JTB3.1 RecName: Full=Protein DETOXIFICATION 35; Short=AtDTX35; AltName: Full=Multidrug and toxic compound extrusion protein 35; Short=MATE protein 35; AltName: Full=Protein DETOXIFYING EFFLUX CARRIER 35; Short=Protein DTX5; AltName: Full=Protein FL	128	Over-dominance	High-parental dominance
gene-BC332_00658	Gh_D13G0036	ERF family protein	Histone-lysine N-methyltransferase%2C H3 lysine-9 specific SUVH6	128	Over-dominance	High-parental dominance
gene-BC332_00819	676725992	ERF family protein	hypothetical protein	128	Over-dominance	High-parental dominance
gene-BC332_01945	Ahy008704	ERF family protein	Inacte beta-amylase 9	128	Over-dominance	High-parental dominance
gene-BC332_03054	676725992	ERF family protein	hypothetical protein	128	Over-dominance	High-parental dominance
gene-BC332_04260	TRIUR3_31251-P1	ERF family protein	hypothetical protein	128	Over-dominance	High-parental dominance
gene-BC332_06778	Dca52842.1	ERF family protein	Serine/threonine-protein phosphatase PP1	128	Over-dominance	High-parental dominance
gene-BC332_07024	Bv5_101120_supk.t1	ERF family protein	Sugar transport protein 13	128	Over-dominance	High-parental dominance
gene-BC332_07883	Bv5_101120_supk.t1	ERF family protein	Hexose carrier protein HEX6	128	Over-dominance	High-parental dominance
gene-BC332_09438	GSBRNA2T00143349001	ERF family protein	hypothetical protein	128	Over-dominance	High-parental dominance
gene-BC332_10399	Kaladp0839s0004.1.p	ERF family protein	Cysteine-rich receptor-like protein kinase 25	128	Over-dominance	High-parental dominance
gene-BC332_11482	Cc01_g03550	ERF family protein	hypothetical protein	128	Over-dominance	High-parental dominance
gene-BC332_12506	CA05g01840	ERF family protein	hypothetical protein	128	Over-dominance	High-parental dominance
gene-BC332_15847	Sopen11g017580.1	ERF family protein	hypothetical protein	128	Over-dominance	High-parental dominance
gene-BC332_19731	DCAR_013815	ERF family protein	Vacuolar cation/proton exchanger 2	128	Over-dominance	High-parental dominance
gene-BC332_22295	ONHigh-parental dominanceA06G05580.1	ERF family protein	Caffeoyl-CoA O-methyltransferase 6	128	Over-dominance	High-parental dominance
gene-BC332_24262	evm.TU.contig_30133.1	ERF family protein	putate beta-1%2C3-galactosyltransferase 1	128	Over-dominance	High-parental dominance
gene-BC332_25869	EMT28879	ERF family protein	putate leucine-rich repeat receptor-like serine/threonine-protein kinase	128	Over-dominance	High-parental dominance
novel.6151	Sopen04g022770.1	ERF family protein	- && - && -	128	Over-dominance	High-parental dominance
novel.7215	GSBRNA2T00143349001	ERF family protein	- && - && -	128	Over-dominance	High-parental dominance
gene-BC332_07465	Sopen11g017580.1	ERF family protein	putate galactinol--sucrose galactosyltransferase 1	128	Over-dominance	Additivity
gene-BC332_14038	Rsa1.0_03034.1_g00001.1	ERF family protein	Laccase-5	128	Low-parental dominance	Low-parental dominance
gene-BC332_24097	DCAR_013815	ERF family protein	Glucose-1-phosphate adenylyltransferase small subunit%2C chloroplastic	128	Low-parental dominance	Low-parental dominance
gene-BC332_27366	Achn181331	ERF family protein	hypothetical protein	128	Low-parental dominance	Low-parental dominance
gene-BC332_05960	Zjn_sc00086.1.g02330.1.am.mk	ERF family protein	ABC transporter B family member 18	128	Low-parental dominance	High-parental dominance
gene-BC332_09610	Itr_sc000795.1_g00005.1	ERF family protein	hypothetical protein	128	Low-parental dominance	High-parental dominance
gene-BC332_10101	Glyma.13G227100.1.p	ERF family protein	hypothetical protein	128	Low-parental dominance	High-parental dominance
novel.1703	Sopen11g017580.1	ERF family protein	- && P10978.1 RecName: Full=Retrovirus-related Pol polyprotein from transposon TNT 1-94; Includes: RecName: Full=Protease; Includes: RecName: Full=Reverse transcriptase; Includes: RecName: Full=Endonuclease && PF13976:GAG-pre-integrase domain|PF00665:Inte	128	Low-parental dominance	High-parental dominance
novel.2566	TRIUR3_11943-P1	ERF family protein	- && Q9FKQ1.1 RecName: Full=Protein DETOXIFICATION 27; Short=AtDTX27; AltName: Full=Multidrug and toxic compound extrusion protein 27; Short=MATE protein 27 && PF01554:MatE	128	Low-parental dominance	High-parental dominance
gene-BC332_01122	Pbr002083.1	ERF family protein	Glucan endo-1%2C3-beta-glucosidase 5	128	High-parental dominance	Low-parental dominance
novel.999	Rsa1.0_03034.1_g00001.1	ERF family protein	- && Q8VZA1.1 RecName: Full=Laccase-11; AltName: Full=Benzenediol:oxygen oxidoreductase 11; AltName: Full=Diphenol oxidase 11; AltName: Full=Urishiol oxidase 11; Flags: Precursor && PF07731:Multicopper oxidase	128	High-parental dominance	Low-parental dominance
gene-BC332_21887	orange1.1g005229m	ERF family protein	hypothetical protein	128	High-parental dominance	Low-parental dominance
gene-BC332_11821	Sopen11g017580.1	ERF family protein	Serine carboxypeptidase-like 17	128	High-parental dominance	High-parental dominance
novel.133	676777512	ERF family protein	- && Q9C9D0.1 RecName: Full=Cytosolic sulfotransferase 16; Short=AtSOT16; AltName: Full=Desulfoglucosinolate sulfotransferase A; Short=AtST5a; AltName: Full=Protein CORONATINE INDUCED 7 && PF00685:Sulfotransferase domain	128	High-parental dominance	High-parental dominance
novel.1533	676777512	ERF family protein	- && P52836.2 RecName: Full=Flavonol 3-sulfotransferase; Short=F3-ST && PF00685:Sulfotransferase domain	128	High-parental dominance	High-parental dominance
novel.2847	Rsa1.0_03034.1_g00001.1	ERF family protein	- && Q9FLB5.1 RecName: Full=Laccase-12; AltName: Full=Benzenediol:oxygen oxidoreductase 12; AltName: Full=Diphenol oxidase 12; AltName: Full=Urishiol oxidase 12; Flags: Precursor && PF07731:Multicopper oxidase	128	High-parental dominance	High-parental dominance
novel.3659	DCAR_013815	ERF family protein	- && Q8L783.1 RecName: Full=Vacuolar cation/proton exchanger 5; AltName: Full=Ca(2+)/H(+) antiporter CAX5; AltName: Full=Ca(2+)/H(+) exchanger 5; AltName: Full=Protein CATION EXCHANGER 5 && PF01699:Sodium/calcium exchanger protein	128	High-parental dominance	High-parental dominance
novel.4522	676779274	ERF family protein	- && Q9SUV2.1 RecName: Full=Probable sugar phosphate/phosphate translocator At4g32390 && -	128	High-parental dominance	High-parental dominance
novel.7782	Achn271311	ERF family protein	- && P42054.2 RecName: Full=Outer plastidial membrane protein porin; AltName: Full=Voltage-dependent anion-selecte channel protein; Short=VDAC && -	128	High-parental dominance	High-parental dominance
novel.966	Sopen11g017580.1	ERF family protein	- && F4HQ05.1 RecName: Full=Protein DETOXIFICATION 8; Short=AtDTX8; AltName: Full=Multidrug and toxic compound extrusion protein 8; Short=MATE protein 8 && PF01554:MatE	128	High-parental dominance	High-parental dominance
gene-BC332_14737	Medtr4g134870.1	ERF family protein	Zeaxanthin epoxidase%2C chloroplastic	128	High-parental dominance	High-parental dominance
novel.3038	Lj5g3v1697360.1	ERF family protein	- && Q3EBC8.2 RecName: Full=Endoribonuclease Dicer homolog 2; AltName: Full=Dicer-like protein 2; Short=AtDCL2 && -	128	High-parental dominance	High-parental dominance
gene-BC332_10175	EMT28879	ERF family protein	hypothetical protein	128	High-parental dominance	Additivity
gene-BC332_14037	Rsa1.0_03034.1_g00001.1	ERF family protein	Laccase-5	128	High-parental dominance	Additivity
gene-BC332_23061	Prupe.3G009400.1.p	ERF family protein	Aquaporin PIP2-1	128	High-parental dominance	Additivity
novel.1383	Sopen11g017580.1	ERF family protein	- && - && PF00098:Zinc knuckle	128	High-parental dominance	Additivity
novel.4927	EMT23900	ERF family protein	- && Q9M658.1 RecName: Full=Helicase protein MOM1; AltName: Full=Protein MAINTENANCE OF METHYLATION; AltName: Full=Protein MORPHEUS MOLECULE 1 && PF00176:SNF2 family N-terminal domain	128	High-parental dominance	Additivity
novel.6343	676777512	ERF family protein	- && Q9M1V1.1 RecName: Full=Cytosolic sulfotransferase 6; Short=AtSOT6; AltName: Full=sulfotransferase 3b; Short=AtST3b && PF00685:Sulfotransferase domain	128	High-parental dominance	Additivity
gene-BC332_16943	Bv5_101120_supk.t1	ERF family protein	Inositol transporter 1	128	High-parental dominance	Additivity
novel.5867	Sopen11g017580.1	ERF family protein	- && P10978.1 RecName: Full=Retrovirus-related Pol polyprotein from transposon TNT 1-94; Includes: RecName: Full=Protease; Includes: RecName: Full=Reverse transcriptase; Includes: RecName: Full=Endonuclease && PF05970:PIF1-like helicase|PF00665:Integrase	128	High-parental dominance	Additivity
gene-BC332_12143	Bradi3g42627.5.p	ERF family protein	hypothetical protein	128	Additivity	High-parental dominance
gene-BC332_26380	DCAR_013815	ERF family protein	Vacuolar cation/proton exchanger 2	128	Additivity	High-parental dominance
novel.1583	XP_016447462.1	ERF family protein	- && - && -	128	Additivity	High-parental dominance
gene-BC332_11048	Rsa1.0_05367.1_g00003.1	ERF family protein	putate serine/threonine-protein kinase	128	Additivity	Additivity
gene-BC332_27211	KN538737.1_FGP011	ERF family protein	hypothetical protein	128	Additivity	Additivity
novel.1823	DCAR_013815	ERF family protein	- && P23509.2 RecName: Full=Glucose-1-phosphate adenylyltransferase small subunit, chloroplastic/amyloplastic; AltName: Full=ADP-glucose pyrophosphorylase; AltName: Full=ADP-glucose synthase; AltName: Full=AGPase B; AltName: Full=Alpha-D-glucose-1-phospha	128	Additivity	Additivity
novel.2174	Sopen11g017580.1	ERF family protein	- && - && -	128	Additivity	Additivity
novel.4012	Sopen11g017580.1	ERF family protein	- && - && -	128	Additivity	Additivity
novel.6497	XP_009771234.1	ERF family protein	- && O65583.2 RecName: Full=Uridine kinase-like protein 4; Includes: RecName: Full=Uridine kinase; Short=UK; Includes: RecName: Full=Putate uracil phosphoribosyltransferase; Short=UPRTase; AltName: Full=UMP pyrophosphorylase && -	128	Additivity	Additivity
novel.6719	Rsa1.0_03034.1_g00001.1	ERF family protein	- && Q9FLB5.1 RecName: Full=Laccase-12; AltName: Full=Benzenediol:oxygen oxidoreductase 12; AltName: Full=Diphenol oxidase 12; AltName: Full=Urishiol oxidase 12; Flags: Precursor && -	128	Additivity	Additivity
novel.7358	Sopen11g017580.1	ERF family protein	- && - && -	128	Additivity	Additivity
gene-BC332_02439	KHN00243.1	WRKY family protein	Protein S-acyltransferase 18	118	Under-dominance	Under-dominance
gene-BC332_04650	Vradi06g11150.1	WRKY family protein	Nucleobase-ascorbate transporter 7	118	Under-dominance	Under-dominance
gene-BC332_05011	GSMUA_Achr8P15080_001	WRKY family protein	H/ACA ribonucleoprotein complex subunit 4	118	Under-dominance	Under-dominance
gene-BC332_24380	Sme2.5_00196.1_g00004.1	WRKY family protein	Thymidine kinase	118	Under-dominance	Under-dominance
gene-BC332_32422	KFK35572.1	WRKY family protein	hypothetical protein	118	Under-dominance	Under-dominance
gene-BC332_10469	Aqcoe2G051500.1.p	WRKY family protein	hypothetical protein	118	Under-dominance	Over-dominance
gene-BC332_28292	Aco009877.1	WRKY family protein	DNA-damage-repair/toleration protein	118	Under-dominance	Over-dominance
gene-BC332_33254	Aqcoe2G051500.1.p	WRKY family protein	hypothetical protein	118	Under-dominance	Over-dominance
gene-BC332_00155	678392851	WRKY family protein	Monodehydroascorbate reductase%2C chloroplastic	118	Under-dominance	Low-parental dominance
gene-BC332_06158	OGLUM12G00050.4	WRKY family protein	Phosphate carrier protein%2C mitochondrial	118	Under-dominance	Low-parental dominance
gene-BC332_07345	PH01004450G0140	WRKY family protein	60S ribosomal protein L23	118	Under-dominance	Low-parental dominance
gene-BC332_08849	Medtr0130s0060.1	WRKY family protein	hypothetical protein	118	Under-dominance	Low-parental dominance
gene-BC332_09857	OGLUM12G00050.4	WRKY family protein	putate mitochondrial adenine nucleotide transporter BTL1	118	Under-dominance	Low-parental dominance
gene-BC332_10190	Aco009877.1	WRKY family protein	hypothetical protein	118	Under-dominance	Low-parental dominance
gene-BC332_14660	PH01004450G0140	WRKY family protein	60S ribosomal protein L23	118	Under-dominance	Low-parental dominance
gene-BC332_17322	OGLUM12G01270.1	WRKY family protein	Protein TOC75%2C chloroplastic	118	Under-dominance	Low-parental dominance
gene-BC332_21566	Zpz_sc01718.1.g00030.1.am.mk	WRKY family protein	hypothetical protein	118	Under-dominance	Low-parental dominance
gene-BC332_26043	Niben101Scf25537g00002.1	WRKY family protein	hypothetical protein	118	Under-dominance	Low-parental dominance
gene-BC332_29318	Sme2.5_00196.1_g00004.1	WRKY family protein	Thymidine kinase	118	Under-dominance	Low-parental dominance
novel.3819	KZV25770.1	WRKY family protein	- && Q8H1S6.1 RecName: Full=U2 small nuclear ribonucleoprotein B'' 2; Short=U2 snRNP B'' 2 && PF00076:RNA recognition motif. (a.k.a. RRM, RBD, or RNP domain)	118	Under-dominance	Low-parental dominance
novel.7069	PH01000622G0760	WRKY family protein	- && Q8L3Z8.1 RecName: Full=Protein FIZZY-RELATED 2; AltName: Full=Cell cycle switch protein CCS52A1 && -	118	Under-dominance	Low-parental dominance
gene-BC332_16095	676758502	WRKY family protein	50S ribosomal protein L21%2C chloroplastic	118	Under-dominance	High-parental dominance
gene-BC332_25104	678452482	WRKY family protein	Mannan endo-1%2C4-beta-mannosidase 2	118	Under-dominance	High-parental dominance
gene-BC332_26331	Pp3c2_23590V3.6.p	WRKY family protein	Oxygen-evolving enhancer protein 2%2C chloroplastic	118	Under-dominance	High-parental dominance
gene-BC332_30829	mrna31843.1-v1.0-hybrid	WRKY family protein	Endoglucanase 2	118	Under-dominance	High-parental dominance
gene-BC332_20791	Tp57577_TGAC_v2_mRNA12733	WRKY family protein	putate sarcosine oxidase	118	Under-dominance	Additivity
gene-BC332_26419	Sme2.5_06310.1_g00004.1	WRKY family protein	UDP-glycosyltransferase 73C1	118	Under-dominance	Additivity
gene-BC332_09121	OGLUM03G34520.2	WRKY family protein	UDP-glucose 6-dehydrogenase 5	118	Over-dominance	Under-dominance
gene-BC332_08362	Medtr1g077760.1	WRKY family protein	Protein yippee-like	118	Over-dominance	Over-dominance
gene-BC332_09968	Aco009877.1	WRKY family protein	hypothetical protein	118	Over-dominance	Over-dominance
gene-BC332_17109	FANhyb_rscf00000217.1.g00006.1	WRKY family protein	putate serine/threonine-protein kinase RLCKUnder-dominance	118	Over-dominance	Over-dominance
gene-BC332_21090	CA08g03020	WRKY family protein	putate WRKY transcription factor 13	118	Over-dominance	Over-dominance
gene-BC332_23442	Sme2.5_02587.1_g00015.1	WRKY family protein	putate WRKY transcription factor 26	118	Over-dominance	Over-dominance
gene-BC332_25457	Aco009877.1	WRKY family protein	hypothetical protein	118	Over-dominance	Over-dominance
gene-BC332_32954	FANhyb_rscf00000217.1.g00006.1	WRKY family protein	hypothetical protein	118	Over-dominance	Over-dominance
novel.1380	Aco009877.1	WRKY family protein	- && Q1MX30.1 RecName: Full=Receptor kinase-like protein Xa21; Contains: RecName: Full=Receptor kinase-like protein Xa21, processed; Flags: Precursor && PF13855:Leucine rich repeat|PF00069:Protein kinase domain	118	Over-dominance	Over-dominance
novel.2341	Aco009877.1	WRKY family protein	- && Q1MX30.1 RecName: Full=Receptor kinase-like protein Xa21; Contains: RecName: Full=Receptor kinase-like protein Xa21, processed; Flags: Precursor && PF13855:Leucine rich repeat|PF00069:Protein kinase domain|PF07714:Protein tyrosine kinase	118	Over-dominance	Over-dominance
novel.2386	Aco009877.1	WRKY family protein	- && Q2R2D5.1 RecName: Full=Receptor kinase-like protein Xa21; Contains: RecName: Full=Receptor kinase-like protein Xa21, processed; Flags: Precursor && PF13855:Leucine rich repeat|PF00069:Protein kinase domain	118	Over-dominance	Over-dominance
novel.2387	Aco009877.1	WRKY family protein	- && Q1MX30.1 RecName: Full=Receptor kinase-like protein Xa21; Contains: RecName: Full=Receptor kinase-like protein Xa21, processed; Flags: Precursor && PF13855:Leucine rich repeat|PF00069:Protein kinase domain	118	Over-dominance	Over-dominance
novel.7663	Aco009877.1	WRKY family protein	- && Q1MX30.1 RecName: Full=Receptor kinase-like protein Xa21; Contains: RecName: Full=Receptor kinase-like protein Xa21, processed; Flags: Precursor && PF00069:Protein kinase domain|PF13855:Leucine rich repeat	118	Over-dominance	Over-dominance
gene-BC332_12037	Pahal.H01961.1	WRKY family protein	Mitogen-actated protein kinase kinase kinase YODA	118	Over-dominance	Low-parental dominance
novel.4870	Sme2.5_06310.1_g00004.1	WRKY family protein	- && Q9AT54.1 RecName: Full=Scopoletin glucosyltransferase; AltName: Full=Phenylpropanoid:glucosyltransferase 1 && PF00201:UDP-glucoronosyl and UDP-glucosyl transferase	118	Over-dominance	Low-parental dominance
novel.7332	AT4G12020.1	WRKY family protein	- && - && -	118	Over-dominance	Low-parental dominance
gene-BC332_22421	TRIUR3_12546-P1	WRKY family protein	Long chain acyl-CoA synthetase 2	118	Over-dominance	High-parental dominance
novel.5881	Aco009877.1	WRKY family protein	- && Q1MX30.1 RecName: Full=Receptor kinase-like protein Xa21; Contains: RecName: Full=Receptor kinase-like protein Xa21, processed; Flags: Precursor && PF00069:Protein kinase domain|PF13855:Leucine rich repeat	118	Over-dominance	High-parental dominance
novel.7060	Sopen05g009000.1	WRKY family protein	- && Q9FIT8.2 RecName: Full=ADP-ribosylation factor GTPase-actating protein AGD1; Short=ARF GAP AGD1; AltName: Full=Protein ARF-GAP DOMAIN 1; Short=AtAGD1 && -	118	Over-dominance	High-parental dominance
gene-BC332_12489	Aco009877.1	WRKY family protein	hypothetical protein	118	Over-dominance	High-parental dominance
gene-BC332_19784	KFK35572.1	WRKY family protein	hypothetical protein	118	Over-dominance	High-parental dominance
gene-BC332_31593	CA07g11490	WRKY family protein	WRKY transcription factor 6	118	Over-dominance	High-parental dominance
novel.2058	Aco009877.1	WRKY family protein	- && Q1MX30.1 RecName: Full=Receptor kinase-like protein Xa21; Contains: RecName: Full=Receptor kinase-like protein Xa21, processed; Flags: Precursor && PF13855:Leucine rich repeat|PF07714:Protein tyrosine kinase	118	Over-dominance	High-parental dominance
novel.2103	Aco009877.1	WRKY family protein	- && Q1MX30.1 RecName: Full=Receptor kinase-like protein Xa21; Contains: RecName: Full=Receptor kinase-like protein Xa21, processed; Flags: Precursor && PF00069:Protein kinase domain|PF13855:Leucine rich repeat	118	Over-dominance	High-parental dominance
gene-BC332_00268	CA01g01280	WRKY family protein	putate WRKY transcription factor 46	118	Over-dominance	High-parental dominance
gene-BC332_04224	Aco009877.1	WRKY family protein	LRR receptor-like serine/threonine-protein kinase FLS2	118	Over-dominance	High-parental dominance
gene-BC332_05111	CA02g18540	WRKY family protein	WRKY transcription factor 6	118	Over-dominance	High-parental dominance
gene-BC332_06783	Pavir.7NG095000.1.p	WRKY family protein	putate inorganic phosphate transporter 1-5	118	Over-dominance	High-parental dominance
gene-BC332_08569	OGLUM12G00050.4	WRKY family protein	Phosphate carrier protein%2C mitochondrial	118	Over-dominance	High-parental dominance
gene-BC332_09231	XP_010923015.1	WRKY family protein	hypothetical protein	118	Over-dominance	High-parental dominance
gene-BC332_10254	Aco009877.1	WRKY family protein	hypothetical protein	118	Over-dominance	High-parental dominance
gene-BC332_10350	Aco009877.1	WRKY family protein	hypothetical protein	118	Over-dominance	High-parental dominance
gene-BC332_11096	Aco009877.1	WRKY family protein	hypothetical protein	118	Over-dominance	High-parental dominance
gene-BC332_11134	Thecc1EG021580t1	WRKY family protein	F-box protein SKP2A	118	Over-dominance	High-parental dominance
gene-BC332_12456	Aco009877.1	WRKY family protein	hypothetical protein	118	Over-dominance	High-parental dominance
gene-BC332_19520	GSMUA_Achr2P20130_001	WRKY family protein	Protein MEI2-like 5	118	Over-dominance	High-parental dominance
gene-BC332_20350	CA01g34470	WRKY family protein	hypothetical protein	118	Over-dominance	High-parental dominance
gene-BC332_20450	CA01g29700	WRKY family protein	putate WRKY transcription factor 7	118	Over-dominance	High-parental dominance
gene-BC332_25057	AA10G00404	WRKY family protein	hypothetical protein	118	Over-dominance	High-parental dominance
gene-BC332_25981	Sme2.5_06310.1_g00004.1	WRKY family protein	UDP-glycosyltransferase 73C5	118	Over-dominance	High-parental dominance
gene-BC332_26315	Vang05g09490.1	WRKY family protein	hypothetical protein	118	Over-dominance	High-parental dominance
gene-BC332_27634	CA03g32070	WRKY family protein	hypothetical protein	118	Over-dominance	High-parental dominance
gene-BC332_28621	FANhyb_rscf00000217.1.g00006.1	WRKY family protein	putate serine/threonine-protein kinase RLCKUnder-dominance	118	Over-dominance	High-parental dominance
novel.2053	Aco009877.1	WRKY family protein	- && Q9LRP3.1 RecName: Full=Probable receptor-like protein kinase At3g17420; Flags: Precursor && PF00069:Protein kinase domain	118	Over-dominance	High-parental dominance
novel.2352	Aco009877.1	WRKY family protein	- && Q1MX30.1 RecName: Full=Receptor kinase-like protein Xa21; Contains: RecName: Full=Receptor kinase-like protein Xa21, processed; Flags: Precursor && PF00069:Protein kinase domain|PF13855:Leucine rich repeat	118	Over-dominance	High-parental dominance
novel.2379	Aco009877.1	WRKY family protein	- && Q1MX30.1 RecName: Full=Receptor kinase-like protein Xa21; Contains: RecName: Full=Receptor kinase-like protein Xa21, processed; Flags: Precursor && PF13855:Leucine rich repeat|PF00069:Protein kinase domain	118	Over-dominance	High-parental dominance
novel.6930	Aco009877.1	WRKY family protein	- && Q1MX30.1 RecName: Full=Receptor kinase-like protein Xa21; Contains: RecName: Full=Receptor kinase-like protein Xa21, processed; Flags: Precursor && PF13855:Leucine rich repeat|PF00069:Protein kinase domain	118	Over-dominance	High-parental dominance
gene-BC332_20208	KFK35572.1	WRKY family protein	hypothetical protein	118	Low-parental dominance	Low-parental dominance
gene-BC332_34006	Aco012507.1	WRKY family protein	Protein TRANSPORT INHIBITOR RESPONSE 1	118	Low-parental dominance	Low-parental dominance
gene-BC332_16012	mrna31843.1-v1.0-hybrid	WRKY family protein	Endoglucanase 16	118	Low-parental dominance	High-parental dominance
gene-BC332_20003	Aco009877.1	WRKY family protein	putate leucine-rich repeat receptor-like protein kinase	118	Low-parental dominance	High-parental dominance
gene-BC332_25895	Sme2.5_04517.1_g00003.1	WRKY family protein	ATP-dependent zinc metalloprotease FTSH 3%2C mitochondrial	118	Low-parental dominance	High-parental dominance
novel.2107	Aco009877.1	WRKY family protein	- && Q1MX30.1 RecName: Full=Receptor kinase-like protein Xa21; Contains: RecName: Full=Receptor kinase-like protein Xa21, processed; Flags: Precursor && PF13855:Leucine rich repeat|PF00069:Protein kinase domain|PF07714:Protein tyrosine kinase	118	Low-parental dominance	High-parental dominance
gene-BC332_10352	Aco009877.1	WRKY family protein	hypothetical protein	118	High-parental dominance	Over-dominance
gene-BC332_12896	TRIUR3_28246-P1	WRKY family protein	hypothetical protein	118	High-parental dominance	High-parental dominance
gene-BC332_34242	Neem_2071_f_3	WRKY family protein	hypothetical protein	118	High-parental dominance	High-parental dominance
gene-BC332_34243	MDP0000578301	WRKY family protein	hypothetical protein	118	High-parental dominance	High-parental dominance
gene-BC332_34480	MDP0000578301	WRKY family protein	hypothetical protein	118	High-parental dominance	High-parental dominance
gene-BC332_34801	MDP0000578301	WRKY family protein	hypothetical protein	118	High-parental dominance	High-parental dominance
novel.2071	Aco009877.1	WRKY family protein	- && Q1MX30.1 RecName: Full=Receptor kinase-like protein Xa21; Contains: RecName: Full=Receptor kinase-like protein Xa21, processed; Flags: Precursor && PF13855:Leucine rich repeat|PF00069:Protein kinase domain	118	High-parental dominance	High-parental dominance
novel.2383	Aco009877.1	WRKY family protein	- && Q1MX30.1 RecName: Full=Receptor kinase-like protein Xa21; Contains: RecName: Full=Receptor kinase-like protein Xa21, processed; Flags: Precursor && PF07714:Protein tyrosine kinase|PF13855:Leucine rich repeat	118	High-parental dominance	High-parental dominance
novel.6137	Gh_A07G0263	WRKY family protein	- && Q9LK40.1 RecName: Full=DNA-directed RNA polymerases and V subunit 2; AltName: Full=DNA-directed RNA polymerase D subunit 2a; Short=AtNRPD2a; Short=Nuclear RNA polymerase D 2a; AltName: Full=Nuclear RNA polymerase E 2; AltName: Full=Protein DEFECTI	118	High-parental dominance	High-parental dominance
novel.6867	Rsa1.0_01894.1_g00003.1	WRKY family protein	- && P92519.1 RecName: Full=Uncharacterized mitochondrial protein AtMg00810; AltName: Full=ORF240b && PF13976:GAG-pre-integrase domain|PF00665:Integrase core domain|PF07727:Reverse transcriptase (RNA-dependent DNA polymerase)	118	High-parental dominance	High-parental dominance
gene-BC332_01915	AA10G00404	WRKY family protein	hypothetical protein	118	High-parental dominance	High-parental dominance
gene-BC332_10217	Aco009877.1	WRKY family protein	hypothetical protein	118	High-parental dominance	High-parental dominance
gene-BC332_10353	Aco009877.1	WRKY family protein	hypothetical protein	118	High-parental dominance	High-parental dominance
gene-BC332_10416	Aco009877.1	WRKY family protein	hypothetical protein	118	High-parental dominance	High-parental dominance
gene-BC332_10436	Aco009877.1	WRKY family protein	hypothetical protein	118	High-parental dominance	High-parental dominance
gene-BC332_10468	FANhyb_rscf00000217.1.g00006.1	WRKY family protein	hypothetical protein	118	High-parental dominance	High-parental dominance
gene-BC332_12328	FANhyb_rscf00003540.1.g00001.1	WRKY family protein	hypothetical protein	118	High-parental dominance	High-parental dominance
gene-BC332_12440	Aco009877.1	WRKY family protein	hypothetical protein	118	High-parental dominance	High-parental dominance
gene-BC332_26882	Neem_2071_f_3	WRKY family protein	hypothetical protein	118	High-parental dominance	High-parental dominance
gene-BC332_26942	Neem_2071_f_3	WRKY family protein	hypothetical protein	118	High-parental dominance	High-parental dominance
gene-BC332_31289	Traes_5AL_B4E8A3115.2	WRKY family protein	Ankyrin repeat-containing protein	118	High-parental dominance	High-parental dominance
novel.105	Sopen05g009000.1	WRKY family protein	- && - && -	118	High-parental dominance	High-parental dominance
gene-BC332_10435	Aco009877.1	WRKY family protein	hypothetical protein	118	High-parental dominance	Additivity
novel.1746	Rsa1.0_01894.1_g00003.1	WRKY family protein	- && P04146.3 RecName: Full=Copia protein; AltName: Full=Gag-int-pol protein; Contains: RecName: Full=Copia VLP protein; Contains: RecName: Full=Copia protease && PF13976:GAG-pre-integrase domain|PF00665:Integrase core domain	118	High-parental dominance	Additivity
novel.6117	Rsa1.0_01894.1_g00003.1	WRKY family protein	- && - && -	118	High-parental dominance	Additivity
gene-BC332_02753	OGLUM12G00050.4	WRKY family protein	hypothetical protein	118	Additivity	High-parental dominance
gene-BC332_19001	OGLUM03G34520.2	WRKY family protein	UDP-glucose 6-dehydrogenase 1	118	Additivity	High-parental dominance
gene-BC332_26848	MDP0000578301	WRKY family protein	hypothetical protein	118	Additivity	High-parental dominance
gene-BC332_26881	MDP0000578301	WRKY family protein	hypothetical protein	118	Additivity	High-parental dominance
gene-BC332_26940	MDP0000578301	WRKY family protein	hypothetical protein	118	Additivity	High-parental dominance
gene-BC332_33364	Aco009877.1	WRKY family protein	hypothetical protein	118	Additivity	High-parental dominance
novel.2075	Aco009877.1	WRKY family protein	- && C0LGT6.1 RecName: Full=LRR receptor-like serine/threonine-protein kinase EFR; AltName: Full=Elongation factor Tu receptor; Short=EF-Tu receptor; Flags: Precursor && PF07714:Protein tyrosine kinase	118	Additivity	High-parental dominance
novel.2384	Aco009877.1	WRKY family protein	- && Q1MX30.1 RecName: Full=Receptor kinase-like protein Xa21; Contains: RecName: Full=Receptor kinase-like protein Xa21, processed; Flags: Precursor && PF00069:Protein kinase domain	118	Additivity	High-parental dominance
novel.6606	Rsa1.0_01894.1_g00003.1	WRKY family protein	- && P10978.1 RecName: Full=Retrovirus-related Pol polyprotein from transposon TNT 1-94; Includes: RecName: Full=Protease; Includes: RecName: Full=Reverse transcriptase; Includes: RecName: Full=Endonuclease && PF07727:Reverse transcriptase (RNA-dependent	118	Additivity	High-parental dominance
gene-BC332_18136	AA10G00404	WRKY family protein	hypothetical protein	118	Additivity	Additivity
gene-BC332_30263	Aco009877.1	WRKY family protein	hypothetical protein	118	Additivity	Additivity
novel.3760	GSBRNA2T00076300001	WRKY family protein	- && Q6Z8C8.1 RecName: Full=Cyclin-dependent kinase F-4; Short=CDKF;4; AltName: Full=Serine/threonine-protein kinase MHK-like protein 2 && PF00069:Protein kinase domain	118	Additivity	Additivity
novel.6052	Rsa1.0_01894.1_g00003.1	WRKY family protein	- && - && PF13976:GAG-pre-integrase domain	118	Additivity	Additivity
gene-BC332_01212	Tp57577_TGAC_v2_mRNA14116	NAC family protein	putate lysine-specific demethylase JMJD5	116	Under-dominance	Under-dominance
gene-BC332_06036	KN539001.1_FGP003	NAC family protein	Tubulin alpha-1 chain	116	Under-dominance	Under-dominance
gene-BC332_15587	TRAES3BF073600100CFD_t1	NAC family protein	Syntaxin-related protein KNOLLE	116	Under-dominance	Under-dominance
gene-BC332_16805	Sme2.5_01725.1_g00009.1	NAC family protein	hypothetical protein	116	Under-dominance	Under-dominance
gene-BC332_19946	MDP0000320566	NAC family protein	Pectinesterase 2.1	116	Under-dominance	Under-dominance
gene-BC332_21080	Zjn_sc00028.1.g03130.1.am.mk	NAC family protein	Serine/threonine-protein kinase Aurora-1	116	Under-dominance	Under-dominance
gene-BC332_22595	ONHigh-parental dominanceA04G14230.1	NAC family protein	Pentatricopeptide repeat-containing protein%2C mitochondrial	116	Under-dominance	Under-dominance
gene-BC332_26159	KN539001.1_FGP003	NAC family protein	Tubulin beta-2 chain	116	Under-dominance	Under-dominance
gene-BC332_31117	Zjn_sc00028.1.g03130.1.am.mk	NAC family protein	Serine/threonine-protein kinase Aurora-1	116	Under-dominance	Under-dominance
gene-BC332_01430	EPS67213.1	NAC family protein	Lignin-forming anionic peroxidase	116	Under-dominance	Over-dominance
gene-BC332_03584	PGSC0003DMP400015241	NAC family protein	putate NAC domain-containing protein 94	116	Under-dominance	Over-dominance
gene-BC332_06090	Gh_D11G0701	NAC family protein	Serine/threonine-protein kinase D6PKL3	116	Under-dominance	Over-dominance
gene-BC332_25952	Zpz_sc00196.1.g00070.1.am.mk	NAC family protein	12-oxophytodienoate reductase 1	116	Under-dominance	Over-dominance
gene-BC332_00542	MDP0000320566	NAC family protein	putate pectinesterase 68	116	Under-dominance	Low-parental dominance
gene-BC332_02681	PSME_00031843-RA	NAC family protein	DNA replication licensing factor MCM7	116	Under-dominance	Low-parental dominance
gene-BC332_03368	LPERR04G12800.1	NAC family protein	Pentatricopeptide repeat-containing protein%2C mitochondrial	116	Under-dominance	Low-parental dominance
gene-BC332_04130	PEQU_11640	NAC family protein	40S ribosomal protein S4	116	Under-dominance	Low-parental dominance
gene-BC332_04821	Achn219111	NAC family protein	Eukaryotic translation initiation factor 3 subunit D	116	Under-dominance	Low-parental dominance
gene-BC332_05829	mrna04249.1-v1.0-hybrid	NAC family protein	hypothetical protein	116	Under-dominance	Low-parental dominance
gene-BC332_08409	ORUFI04G17470.1	NAC family protein	Pentatricopeptide repeat-containing protein	116	Under-dominance	Low-parental dominance
gene-BC332_09117	Cotton_A_09649_BGI-A2_v1.0	NAC family protein	40S ribosomal protein S19-2	116	Under-dominance	Low-parental dominance
gene-BC332_12117	KN539001.1_FGP003	NAC family protein	Tubulin beta-2 chain	116	Under-dominance	Low-parental dominance
gene-BC332_14195	Achn212001	NAC family protein	hypothetical protein	116	Under-dominance	Low-parental dominance
gene-BC332_14790	PEQU_11640	NAC family protein	40S ribosomal protein S4	116	Under-dominance	Low-parental dominance
gene-BC332_14795	PEQU_11640	NAC family protein	40S ribosomal protein S4	116	Under-dominance	Low-parental dominance
gene-BC332_15105	KN539001.1_FGP003	NAC family protein	Tubulin beta-2 chain	116	Under-dominance	Low-parental dominance
gene-BC332_17345	KN539001.1_FGP003	NAC family protein	Tubulin beta-2 chain	116	Under-dominance	Low-parental dominance
gene-BC332_17431	mrna27940.1-v1.0-hybrid	NAC family protein	hypothetical protein	116	Under-dominance	Low-parental dominance
gene-BC332_21026	MDP0000428265	NAC family protein	Elongation factor 2	116	Under-dominance	Low-parental dominance
gene-BC332_22484	TRAES3BF073600100CFD_t1	NAC family protein	hypothetical protein	116	Under-dominance	Low-parental dominance
gene-BC332_31002	mrna09127.1-v1.0-hybrid	NAC family protein	Polyadenylate-binding protein 2	116	Under-dominance	Low-parental dominance
gene-BC332_32556	Cc01_g08720	NAC family protein	Short-chain dehydrogenase reductase 3b	116	Under-dominance	Low-parental dominance
gene-BC332_32557	Cc01_g08720	NAC family protein	Short-chain dehydrogenase reductase 4	116	Under-dominance	Low-parental dominance
gene-BC332_33724	MDP0000265073	NAC family protein	hypothetical protein	116	Under-dominance	Low-parental dominance
gene-BC332_04802	Tp57577_TGAC_v2_mRNA39490	NAC family protein	hypothetical protein	116	Under-dominance	High-parental dominance
gene-BC332_04932	MDP0000320566	NAC family protein	Pectinesterase/pectinesterase inhibitor 18	116	Under-dominance	High-parental dominance
gene-BC332_08983	mrna27940.1-v1.0-hybrid	NAC family protein	Serine/threonine-protein kinase HT1	116	Under-dominance	High-parental dominance
gene-BC332_11339	EPS67213.1	NAC family protein	Peroxidase 12	116	Under-dominance	High-parental dominance
gene-BC332_11348	Cc01_g08720	NAC family protein	Momilactone A synthase	116	Under-dominance	High-parental dominance
gene-BC332_17743	GSMUA_Achr6P31580_001	NAC family protein	Haloacid dehalogenase-like hydrolase domain-containing protein	116	Under-dominance	High-parental dominance
gene-BC332_21495	MDP0000191614	NAC family protein	(+)-neomenthol dehydrogenase	116	Under-dominance	High-parental dominance
gene-BC332_30193	MDP0000320566	NAC family protein	putate pectinesterase/pectinesterase inhibitor 51	116	Under-dominance	High-parental dominance
novel.7235	Peaxi162Scf00091g00074.1	NAC family protein	- && - && -	116	Under-dominance	High-parental dominance
novel.7785	MDP0000191614	NAC family protein	- && Q9M2E2.1 RecName: Full=(+)-neomenthol dehydrogenase; AltName: Full=Menthone:neomenthol reductase; AltName: Full=Short-chain dehydrogenase/reductase 1; Short=AtSDR1 && -	116	Under-dominance	High-parental dominance
gene-BC332_11338	EPS67213.1	NAC family protein	Peroxidase 12	116	Under-dominance	Additivity
gene-BC332_19964	Zmw_sc00276.1.g00230.1	NAC family protein	hypothetical protein	116	Over-dominance	Over-dominance
gene-BC332_05194	Peinf101Scf00562g09013.1	NAC family protein	Acidic endochitinase Q	116	Over-dominance	Over-dominance
gene-BC332_07746	CA00g46270	NAC family protein	Protein CUP-SHAPED COTYLEDON 3	116	Over-dominance	Over-dominance
gene-BC332_11729	Achn335281	NAC family protein	Receptor-like protein kinase HAIKU2	116	Over-dominance	Over-dominance
gene-BC332_12067	CA04g20070	NAC family protein	hypothetical protein	116	Over-dominance	Over-dominance
novel.5143	EPS67213.1	NAC family protein	- && - && PF00141:Peroxidase	116	Over-dominance	Over-dominance
gene-BC332_08697	MDP0000265073	NAC family protein	hypothetical protein	116	Over-dominance	Low-parental dominance
gene-BC332_13804	Csa07g061600.1	NAC family protein	putate chalcone--flavonone isomerase 3	116	Over-dominance	Low-parental dominance
gene-BC332_19584	676784632	NAC family protein	hypothetical protein	116	Over-dominance	Low-parental dominance
gene-BC332_24598	ORUFI04G32600.3	NAC family protein	hypothetical protein	116	Over-dominance	Low-parental dominance
gene-BC332_32597	KZV39672.1	NAC family protein	Pyridoxine/pyridoxamine 5'-phosphate oxidase 1%2C chloroplastic	116	Over-dominance	Low-parental dominance
gene-BC332_15748	Zmw_sc00881.1.g00060.1	NAC family protein	hypothetical protein	116	Over-dominance	High-parental dominance
gene-BC332_31069	Cc01_g08720	NAC family protein	hypothetical protein	116	Over-dominance	High-parental dominance
novel.4000	Zjn_sc00028.1.g03130.1.am.mk	NAC family protein	- && O04893.1 RecName: Full=Alpha-glucosidase; AltName: Full=Maltase; Flags: Precursor && PF01055:Glycosyl hydrolases family 31|PF00036:EF hand	116	Over-dominance	High-parental dominance
gene-BC332_00115	CCG000365.1	NAC family protein	Cytochrome 86A4	116	Over-dominance	High-parental dominance
gene-BC332_02421	OMERI12G01050.1	NAC family protein	hypothetical protein	116	Over-dominance	High-parental dominance
gene-BC332_03785	FANhyb_rscf00000139.1.g00001.1	NAC family protein	hypothetical protein	116	Over-dominance	High-parental dominance
gene-BC332_05223	mrna24179.1-v1.0-hybrid	NAC family protein	hypothetical protein	116	Over-dominance	High-parental dominance
gene-BC332_06094	mrna27940.1-v1.0-hybrid	NAC family protein	hypothetical protein	116	Over-dominance	High-parental dominance
gene-BC332_06096	Do024028.1	NAC family protein	hypothetical protein	116	Over-dominance	High-parental dominance
gene-BC332_09278	PSME_00012282-RA	NAC family protein	Protein ECERIFERUM 3	116	Over-dominance	High-parental dominance
gene-BC332_13076	KFK41460.1	NAC family protein	Polygalacturonase	116	Over-dominance	High-parental dominance
gene-BC332_13931	XP_010536267.1	NAC family protein	Protein phosphatase 2C 37	116	Over-dominance	High-parental dominance
gene-BC332_24048	CA09g12970	NAC family protein	NAC domain-containing protein 55	116	Over-dominance	High-parental dominance
gene-BC332_25672	PGSC0003DMP400019203	NAC family protein	NAC domain-containing protein 2	116	Over-dominance	High-parental dominance
gene-BC332_27721	Zpz_sc00801.1.g00050.1.am.mk	NAC family protein	hypothetical protein	116	Over-dominance	High-parental dominance
gene-BC332_28606	Gh_D11G0701	NAC family protein	Phototropin-1	116	Over-dominance	High-parental dominance
gene-BC332_29837	MDP0000266267	NAC family protein	putate E3 ubiquitin-protein ligase ARI7	116	Over-dominance	High-parental dominance
gene-BC332_32507	CA08g15460	NAC family protein	hypothetical protein	116	Over-dominance	High-parental dominance
gene-BC332_09784	Achn004841	NAC family protein	Deacetoxyvindoline 4-hydroxylase	116	Over-dominance	Additivity
novel.4898	Csa09g067970.1	NAC family protein	- && O74362.1 RecName: Full=Pre-rRNA-processing protein esf2; AltName: Full=18S rRNA factor 2 && PF00076:RNA recognition motif. (a.k.a. RRM, RBD, or RNP domain)	116	Low-parental dominance	Under-dominance
gene-BC332_23133	EPS67213.1	NAC family protein	hypothetical protein	116	Low-parental dominance	Over-dominance
gene-BC332_04009	ONHigh-parental dominanceA05G06750.1	NAC family protein	putate tRNA N6-adenosine threonylcarbamoyltransferase	116	Low-parental dominance	Low-parental dominance
gene-BC332_24679	Gh_D11G0701	NAC family protein	hypothetical protein	116	Low-parental dominance	Low-parental dominance
gene-BC332_26012	GSBRNA2T00136766001	NAC family protein	Polyadenylate-binding protein 7	116	Low-parental dominance	Low-parental dominance
gene-BC332_11133	KN540176.1_FGP005	NAC family protein	Chaperone protein dnaJ 10	116	Low-parental dominance	High-parental dominance
gene-BC332_19146	EPS67213.1	NAC family protein	Peroxidase 3	116	Low-parental dominance	High-parental dominance
novel.7370	MDP0000294614	NAC family protein	- && Q9SND9.1 RecName: Full=Uncharacterized acetyltransferase At3g50280 && PF02458:Transferase family	116	Low-parental dominance	High-parental dominance
gene-BC332_06800	Achn004841	NAC family protein	1-aminocyclopropane-1-carboxylate oxidase -like protein 6	116	High-parental dominance	Over-dominance
gene-BC332_03453	Zjn_sc00028.1.g03130.1.am.mk	NAC family protein	Calcium-dependent protein kinase 21	116	High-parental dominance	Low-parental dominance
gene-BC332_09783	Achn004841	NAC family protein	Deacetoxyvindoline 4-hydroxylase	116	High-parental dominance	Low-parental dominance
gene-BC332_05064	Zpz_sc00801.1.g00050.1.am.mk	NAC family protein	hypothetical protein	116	High-parental dominance	High-parental dominance
gene-BC332_16867	CA06g21590	NAC family protein	NAC domain-containing protein 14	116	High-parental dominance	High-parental dominance
gene-BC332_20487	MDP0000294614	NAC family protein	hypothetical protein	116	High-parental dominance	High-parental dominance
gene-BC332_33694	ORUFI12G02480.1	NAC family protein	putate carboxylesterase 12	116	High-parental dominance	High-parental dominance
novel.3616	Sme2.5_00756.1_g00007.1	NAC family protein	- && - && -	116	High-parental dominance	High-parental dominance
novel.5954	Peaxi162Scf00091g00074.1	NAC family protein	- && - && -	116	High-parental dominance	High-parental dominance
gene-BC332_09787	Potri.T074200.1	NAC family protein	hypothetical protein	116	High-parental dominance	High-parental dominance
gene-BC332_13235	MDP0000265073	NAC family protein	hypothetical protein	116	High-parental dominance	High-parental dominance
gene-BC332_13850	OMERI12G01050.1	NAC family protein	hypothetical protein	116	High-parental dominance	High-parental dominance
gene-BC332_20593	Ciclev10031100m	NAC family protein	hypothetical protein	116	High-parental dominance	High-parental dominance
gene-BC332_21500	MDP0000191614	NAC family protein	(+)-neomenthol dehydrogenase	116	High-parental dominance	High-parental dominance
novel.3310	FANhyb_rscf00000673.1.g00001.1	NAC family protein	- && - && -	116	High-parental dominance	High-parental dominance
gene-BC332_07092	Jcr4S00282.90	NAC family protein	Beta-glucosidase 11	116	High-parental dominance	Additivity
gene-BC332_27861	mrna27940.1-v1.0-hybrid	NAC family protein	Serine/threonine-protein kinase HT1	116	High-parental dominance	Additivity
novel.1752	Zpz_sc00801.1.g00050.1.am.mk	NAC family protein	- && P94026.1 RecName: Full=Ribulose-1,5 bisphosphate carboxylase/oxygenase large subunit N-methyltransferase, chloroplastic; AltName: Full=[Ribulose-bisphosphate carboxylase]-lysine N-methyltransferase; Short=RuBisCO LSMT; Short=RuBisCO methyltransferase	116	High-parental dominance	Additivity
novel.2603	XP_009594623.1	NAC family protein	- && - && -	116	High-parental dominance	Additivity
novel.4852	Potri.T074200.1	NAC family protein	- && Q40392.1 RecName: Full=TMV resistance protein N && PF00931:NB-ARC domain|PF01582:TIR domain	116	High-parental dominance	Additivity
gene-BC332_03737	mrna04249.1-v1.0-hybrid	NAC family protein	SPX domain-containing protein 4	116	Additivity	Low-parental dominance
gene-BC332_06365	KFK41460.1	NAC family protein	hypothetical protein	116	Additivity	High-parental dominance
novel.6594	CCG001083.1	NAC family protein	- && Q40392.1 RecName: Full=TMV resistance protein N && -	116	Additivity	High-parental dominance
gene-BC332_13847	OMERI12G01050.1	NAC family protein	hypothetical protein	116	Additivity	Additivity
gene-BC332_17946	MDP0000320566	NAC family protein	putate pectinesterase 53	116	Additivity	Additivity
gene-BC332_27346	GSBRNA2T00098300001	NAC family protein	putate transmembrane ascorbate ferrireductase 4	116	Additivity	Additivity
gene-BC332_28657	MDP0000265073	NAC family protein	hypothetical protein	116	Additivity	Additivity
gene-BC332_34686	CCG000365.1	NAC family protein	hypothetical protein	116	Additivity	Additivity
novel.3360	GRMZM2G386163_P01	NAC family protein	- && - && -	116	Additivity	Additivity
novel.4029	EMT13761	NAC family protein	- && P33491.1 RecName: Full=Auxin-binding protein T92; Short=ABP; Flags: Precursor && PF02041:Auxin binding protein	116	Additivity	Additivity
novel.5318	Sme2.5_07064.1_g00002.1	NAC family protein	- && Q9C8C1.1 RecName: Full=Protein LIKE COV 2 && -	116	Additivity	Additivity
novel.6216	GSMUA_Achr4P07150_001	NAC family protein	- && F4HWY6.1 RecName: Full=Myosin-11; AltName: Full=Myosin XI E; Short=AtXIE && PF02736:Myosin N-terminal SH3-like domain	116	Additivity	Additivity
novel.6595	CCG001083.1	NAC family protein	- && Q40392.1 RecName: Full=TMV resistance protein N && PF13855:Leucine rich repeat	116	Additivity	Additivity
gene-BC332_02243	676740550	B3 family protein	histone H3.2	110	Under-dominance	Under-dominance
gene-BC332_02438	676740550	B3 family protein	histone H3.2	110	Under-dominance	Under-dominance
gene-BC332_02534	676740550	B3 family protein	histone H3.2	110	Under-dominance	Under-dominance
gene-BC332_02592	676740550	B3 family protein	histone H3.2	110	Under-dominance	Under-dominance
gene-BC332_02748	676740550	B3 family protein	histone H3.2	110	Under-dominance	Under-dominance
gene-BC332_04581	676740550	B3 family protein	histone H3.2	110	Under-dominance	Under-dominance
gene-BC332_09252	MDP0000309784	B3 family protein	Calnexin -like protein	110	Under-dominance	Under-dominance
gene-BC332_10018	CA04g19000	B3 family protein	B3 domain-containing protein	110	Under-dominance	Under-dominance
gene-BC332_14836	CA06g03070	B3 family protein	putate B3 domain-containing protein	110	Under-dominance	Under-dominance
gene-BC332_16064	KZV54549.1	B3 family protein	Cyclin-A2-1	110	Under-dominance	Under-dominance
gene-BC332_19894	678360908	B3 family protein	hypothetical protein	110	Under-dominance	Under-dominance
gene-BC332_22052	Lus10025533	B3 family protein	hypothetical protein	110	Under-dominance	Under-dominance
gene-BC332_22268	CA00g41390	B3 family protein	B3 domain-containing protein	110	Under-dominance	Under-dominance
gene-BC332_22374	678360908	B3 family protein	hypothetical protein	110	Under-dominance	Under-dominance
gene-BC332_23141	678360908	B3 family protein	Kinesin-like protein KIN12B	110	Under-dominance	Under-dominance
gene-BC332_23543	mrna07861.1-v1.0-hybrid	B3 family protein	hypothetical protein	110	Under-dominance	Under-dominance
gene-BC332_28809	678360908	B3 family protein	Phragmoplast orienting kinesin-1	110	Under-dominance	Under-dominance
gene-BC332_29917	676740550	B3 family protein	histone H3.2	110	Under-dominance	Under-dominance
gene-BC332_31520	676773256	B3 family protein	Ubiquitin-conjugating enzyme E2 J1	110	Under-dominance	Under-dominance
gene-BC332_31720	KZV54549.1	B3 family protein	Cyclin-A1-1	110	Under-dominance	Under-dominance
gene-BC332_02081	Vang02g01940.3	B3 family protein	putate protein phosphatase 2C 48	110	Under-dominance	Over-dominance
gene-BC332_16419	FANhyb_rscf00002064.1.g00002.1	B3 family protein	hypothetical protein	110	Under-dominance	Over-dominance
gene-BC332_21155	FANhyb_rscf00002064.1.g00002.1	B3 family protein	hypothetical protein	110	Under-dominance	Over-dominance
gene-BC332_33638	XP_010107958.1	B3 family protein	Ferredoxin--nitrite reductase%2C chloroplastic	110	Under-dominance	Over-dominance
gene-BC332_00828	Csa09g088800.1	B3 family protein	Ubiquitin carboxyl-terminal hydrolase 20	110	Under-dominance	Low-parental dominance
gene-BC332_02238	676740550	B3 family protein	histone H3.2	110	Under-dominance	Low-parental dominance
gene-BC332_02535	676740550	B3 family protein	histone H3.2	110	Under-dominance	Low-parental dominance
gene-BC332_02538	676740550	B3 family protein	histone H3.2	110	Under-dominance	Low-parental dominance
gene-BC332_03048	678360908	B3 family protein	60S ribosomal protein L37a	110	Under-dominance	Low-parental dominance
gene-BC332_04270	FANhyb_rscf00002064.1.g00002.1	B3 family protein	hypothetical protein	110	Under-dominance	Low-parental dominance
gene-BC332_09074	Dca56676.1	B3 family protein	Replication protein A 70 kDa DNA-binding subunit B	110	Under-dominance	Low-parental dominance
gene-BC332_11980	LPERR01G24090.1	B3 family protein	hypothetical protein	110	Under-dominance	Low-parental dominance
gene-BC332_14982	676762620	B3 family protein	hypothetical protein	110	Under-dominance	Low-parental dominance
gene-BC332_16451	XP_009588506.1	B3 family protein	Pyrophosphate-energized vacuolar membrane proton pump	110	Under-dominance	Low-parental dominance
gene-BC332_17061	mrna17107.1-v1.0-hybrid	B3 family protein	60S ribosomal protein L12-1	110	Under-dominance	Low-parental dominance
gene-BC332_17419	676762620	B3 family protein	hypothetical protein	110	Under-dominance	Low-parental dominance
gene-BC332_20483	Rsa1.0_01633.1_g00001.1	B3 family protein	40S ribosomal protein S6-1	110	Under-dominance	Low-parental dominance
gene-BC332_21564	676740550	B3 family protein	histone H3-like centromeric protein hH3v	110	Under-dominance	Low-parental dominance
gene-BC332_31020	KZV54549.1	B3 family protein	putate cyclin-A3-1	110	Under-dominance	Low-parental dominance
gene-BC332_31340	Rsa1.0_01633.1_g00001.1	B3 family protein	40S ribosomal protein S6-1	110	Under-dominance	Low-parental dominance
gene-BC332_32147	MDP0000283274	B3 family protein	putate protein phosphatase 2C 5	110	Under-dominance	Low-parental dominance
gene-BC332_09243	mrna12617.1-v1.0-hybrid	B3 family protein	hypothetical protein	110	Under-dominance	High-parental dominance
gene-BC332_15138	mrna20854.1-v1.0-hybrid	B3 family protein	Delta-1-pyrroline-5-carboxylate synthase	110	Under-dominance	High-parental dominance
gene-BC332_16485	MDP0000309784	B3 family protein	Calnexin -like protein	110	Under-dominance	High-parental dominance
gene-BC332_22194	CA01g31320	B3 family protein	hypothetical protein	110	Under-dominance	High-parental dominance
gene-BC332_33884	mrna24052.1-v1.0-hybrid	B3 family protein	Aspartate--tRNA ligase%2C cytoplasmic	110	Over-dominance	Under-dominance
gene-BC332_27038	Thecc1EG000515t1	B3 family protein	hypothetical protein	110	Over-dominance	Over-dominance
gene-BC332_10287	676713104	B3 family protein	Sphingosine kinase 1	110	Over-dominance	Over-dominance
gene-BC332_12026	MDP0000252727	B3 family protein	Serpin-ZX	110	Over-dominance	Over-dominance
gene-BC332_04438	Thecc1EG000515t1	B3 family protein	Isoflavone 2'-hydroxylase	110	Over-dominance	Low-parental dominance
gene-BC332_19131	XP_013628248.1	B3 family protein	Glutamate receptor 3.7	110	Over-dominance	Low-parental dominance
gene-BC332_04682	CA02g16520	B3 family protein	hypothetical protein	110	Over-dominance	Low-parental dominance
novel.302	Dca56676.1	B3 family protein	- && - && PF05970:PIF1-like helicase	110	Over-dominance	Low-parental dominance
gene-BC332_19984	Niben101Scf01272g00016.1	B3 family protein	hypothetical protein	110	Over-dominance	High-parental dominance
gene-BC332_23206	Thecc1EG000515t1	B3 family protein	hypothetical protein	110	Over-dominance	High-parental dominance
gene-BC332_01372	Csa09g088800.1	B3 family protein	Ubiquitin carboxyl-terminal hydrolase 22	110	Over-dominance	High-parental dominance
gene-BC332_07262	MDP0000266051	B3 family protein	putate indole-3-pyruvate monooxygenase YUCCA10	110	Over-dominance	High-parental dominance
gene-BC332_12003	Peinf101Scf00657g08019.1	B3 family protein	hypothetical protein	110	Over-dominance	High-parental dominance
gene-BC332_19242	mrna24052.1-v1.0-hybrid	B3 family protein	hypothetical protein	110	Over-dominance	High-parental dominance
gene-BC332_21740	KN540082.1_FGP001	B3 family protein	hypothetical protein	110	Over-dominance	High-parental dominance
gene-BC332_25829	DCAR_006236	B3 family protein	Ammonium transporter 2 member 2	110	Over-dominance	High-parental dominance
gene-BC332_28615	676713104	B3 family protein	hypothetical protein	110	Over-dominance	High-parental dominance
gene-BC332_30985	Achn131561	B3 family protein	Protein WEAK CHLOROPLAST MOVEMENT UNDER BLUE LIGHT 1	110	Over-dominance	High-parental dominance
gene-BC332_33693	XP_009622138.1	B3 family protein	hypothetical protein	110	Over-dominance	High-parental dominance
gene-BC332_05245	Csa15g044640.1	B3 family protein	hypothetical protein	110	Over-dominance	Additivity
gene-BC332_17118	Thecc1EG000515t1	B3 family protein	hypothetical protein	110	Over-dominance	Additivity
gene-BC332_04439	Thecc1EG000515t1	B3 family protein	Isoflavone 2'-hydroxylase	110	Low-parental dominance	Low-parental dominance
gene-BC332_04685	KZV51983.1	B3 family protein	Anaphase-promoting complex subunit 4	110	Low-parental dominance	Low-parental dominance
gene-BC332_15711	CCG018340.1	B3 family protein	hypothetical protein	110	Low-parental dominance	Low-parental dominance
gene-BC332_17759	CA03g25050	B3 family protein	hypothetical protein	110	Low-parental dominance	Low-parental dominance
gene-BC332_31930	DCAR_025729	B3 family protein	Cell number regulator 10	110	Low-parental dominance	High-parental dominance
novel.3761	Sopen04g007580.1	B3 family protein	- && - && -	110	Low-parental dominance	High-parental dominance
novel.5942	Sme2.5_02819.1_g00002.1	B3 family protein	- && P10978.1 RecName: Full=Retrovirus-related Pol polyprotein from transposon TNT 1-94; Includes: RecName: Full=Protease; Includes: RecName: Full=Reverse transcriptase; Includes: RecName: Full=Endonuclease && PF07727:Reverse transcriptase (RNA-dependent	110	Low-parental dominance	High-parental dominance
gene-BC332_11883	Thecc1EG000515t1	B3 family protein	hypothetical protein	110	Low-parental dominance	Additivity
gene-BC332_00959	XP_016487495.1	B3 family protein	Carotenoid 9%2C10(9'%2C10')-cleavage dioxygenase 1	110	High-parental dominance	Over-dominance
gene-BC332_11993	Thecc1EG000515t1	B3 family protein	Cytochrome 82A3	110	High-parental dominance	High-parental dominance
gene-BC332_13036	Lus10025533	B3 family protein	Pentatricopeptide repeat-containing protein%2C chloroplastic	110	High-parental dominance	High-parental dominance
gene-BC332_17760	CA03g24740	B3 family protein	hypothetical protein	110	High-parental dominance	High-parental dominance
gene-BC332_22387	CA08g17790	B3 family protein	hypothetical protein	110	High-parental dominance	High-parental dominance
novel.4013	Dca56676.1	B3 family protein	- && - && PF05970:PIF1-like helicase	110	High-parental dominance	High-parental dominance
novel.5182	XP_009622138.1	B3 family protein	- && - && -	110	High-parental dominance	High-parental dominance
novel.6817	Sopen00g003940.1	B3 family protein	- && - && -	110	High-parental dominance	High-parental dominance
novel.77	XP_009622138.1	B3 family protein	- && - && -	110	High-parental dominance	High-parental dominance
gene-BC332_02581	678360908	B3 family protein	hypothetical protein	110	High-parental dominance	High-parental dominance
gene-BC332_04683	676713104	B3 family protein	Sphingosine kinase 2	110	High-parental dominance	High-parental dominance
gene-BC332_20580	Sopen00g003940.1	B3 family protein	hypothetical protein	110	High-parental dominance	High-parental dominance
gene-BC332_22371	Sopen08g002450.1	B3 family protein	hypothetical protein	110	High-parental dominance	High-parental dominance
gene-BC332_33828	678360908	B3 family protein	Kinesin KP1	110	High-parental dominance	High-parental dominance
gene-BC332_12285	678360908	B3 family protein	Kinesin KP1	110	High-parental dominance	Additivity
novel.3098	Csa09g088800.1	B3 family protein	- && Q9FPS2.1 RecName: Full=Ubiquitin carboxyl-terminal hydrolase 25; AltName: Full=Deubiquitinating enzyme 25; Short=AtUBP25; AltName: Full=Ubiquitin thioesterase 25; AltName: Full=Ubiquitin-specific-processing protease 25 && -	110	High-parental dominance	Additivity
novel.3810	Sopen00g003940.1	B3 family protein	- && - && PF01585:G-patch domain	110	High-parental dominance	Additivity
novel.390	676713104	B3 family protein	- && F2Y4A3.1 RecName: Full=Sphingosine kinase 2 && -	110	High-parental dominance	Additivity
novel.457	Dca56676.1	B3 family protein	- && P70730.2 RecName: Full=ATP-dependent Clp protease ATP-binding subunit ClpX && -	110	High-parental dominance	Additivity
novel.530	Sopen00g003940.1	B3 family protein	- && - && PF00665:Integrase core domain	110	High-parental dominance	Additivity
novel.7466	898397	B3 family protein	- && Q94CC0.1 RecName: Full=Uncharacterized protein At5g49945; Flags: Precursor && -	110	High-parental dominance	Additivity
novel.1515	XP_009622138.1	B3 family protein	- && - && -	110	High-parental dominance	Additivity
gene-BC332_12408	678360908	B3 family protein	Kinesin KP1	110	Additivity	Low-parental dominance
gene-BC332_02783	DCAR_025679	B3 family protein	hypothetical protein	110	Additivity	High-parental dominance
gene-BC332_20747	Csa17g039240.1	B3 family protein	hypothetical protein	110	Additivity	High-parental dominance
gene-BC332_33101	mrna07861.1-v1.0-hybrid	B3 family protein	hypothetical protein	110	Additivity	High-parental dominance
novel.2004	XP_009622138.1	B3 family protein	- && - && -	110	Additivity	High-parental dominance
novel.5302	Sopen00g003940.1	B3 family protein	- && Q8I7P9.1 RecName: Full=Retrovirus-related Pol polyprotein from transposon opus; Includes: RecName: Full=Protease; Includes: RecName: Full=Reverse transcriptase; Includes: RecName: Full=Endonuclease && PF00665:Integrase core domain|PF10536:Plant mobil	110	Additivity	High-parental dominance
gene-BC332_02021	Peaxi162Scf00045g01644.1	B3 family protein	Dirigent protein 3	110	Additivity	Additivity
gene-BC332_15537	KZV51983.1	B3 family protein	Respiratory burst oxidase -like protein A	110	Additivity	Additivity
gene-BC332_15949	DCAR_002967	B3 family protein	Mitochondrial carnitine/acylcarnitine carrier-like protein	110	Additivity	Additivity
gene-BC332_20525	GSBRNA2T00099890001	B3 family protein	Cell dision cycle 20.4%2C cofactor of APC complex	110	Additivity	Additivity
novel.2964	XP_009622138.1	B3 family protein	- && - && -	110	Additivity	Additivity
novel.3553	CA06g03820	B3 family protein	- && - && PF02362:B3 DNA binding domain	110	Additivity	Additivity
novel.6118	Sopen10g020570.1	B3 family protein	- && - && -	110	Additivity	Additivity
novel.6148	Rsa1.0_00333.1_g00003.1	B3 family protein	- && - && -	110	Additivity	Additivity
gene-BC332_09351	GSMUA_Achr7P21740_001	MYB family protein	Zinc finger protein VAR3%2C chloroplastic	81	Under-dominance	Under-dominance
gene-BC332_16337	GSMUA_Achr8P25970_001	MYB family protein	hypothetical protein	81	Under-dominance	Under-dominance
gene-BC332_18314	CA00g22820	MYB family protein	Transcription factor MYB82	81	Under-dominance	Under-dominance
gene-BC332_18776	Manes.01G259600.1.p	MYB family protein	DEAD-box ATP-dependent RNA helicase 9	81	Under-dominance	Under-dominance
gene-BC332_06087	Zosma2g01900.1	MYB family protein	hypothetical protein	81	Under-dominance	Low-parental dominance
gene-BC332_07950	Tp57577_TGAC_v2_mRNA33623	MYB family protein	Monocopper oxidase-like protein SKS2	81	Under-dominance	Low-parental dominance
gene-BC332_16036	Sme2.5_05193.1_g00003.1	MYB family protein	60S ribosomal protein L18a	81	Under-dominance	Low-parental dominance
gene-BC332_16520	FANhyb_rscf00000010.1.g00028.1	MYB family protein	40S ribosomal protein S7	81	Under-dominance	Low-parental dominance
gene-BC332_16526	Cc04_g06620	MYB family protein	Guanine nucleotide-binding protein subunit beta-like protein	81	Under-dominance	Low-parental dominance
gene-BC332_16710	Sme2.5_05193.1_g00003.1	MYB family protein	60S ribosomal protein L17-1	81	Under-dominance	Low-parental dominance
gene-BC332_18778	TRIUR3_13997-P1	MYB family protein	hypothetical protein	81	Under-dominance	Low-parental dominance
gene-BC332_20895	Manes.01G259600.1.p	MYB family protein	DEAD-box ATP-dependent RNA helicase 15	81	Under-dominance	Low-parental dominance
gene-BC332_21354	CA08g06170	MYB family protein	Transcriptional actator Myb	81	Under-dominance	Low-parental dominance
gene-BC332_21573	Manes.01G259600.1.p	MYB family protein	DEAD-box ATP-dependent RNA helicase 31	81	Under-dominance	Low-parental dominance
gene-BC332_24406	Manes.01G259600.1.p	MYB family protein	DEAD-box ATP-dependent RNA helicase 53	81	Under-dominance	Low-parental dominance
gene-BC332_31559	Sme2.5_05193.1_g00003.1	MYB family protein	hypothetical protein	81	Under-dominance	Low-parental dominance
gene-BC332_33023	ONHigh-parental dominanceA04G19030.1	MYB family protein	Chaperone protein DnaJ	81	Under-dominance	Low-parental dominance
gene-BC332_33100	Zmw_sc04743.1.g00060.1	MYB family protein	hypothetical protein	81	Under-dominance	Low-parental dominance
novel.3724	Sme2.5_05193.1_g00003.1	MYB family protein	- && F4ILR7.1 RecName: Full=DExH-box ATP-dependent RNA helicase DExH1 && -	81	Under-dominance	Low-parental dominance
novel.821	Cc04_g06620	MYB family protein	- && Q75LV5.1 RecName: Full=U3 snoRNP-associated protein-like YAOH; AltName: Full=Protein YAO homolog && -	81	Under-dominance	Low-parental dominance
gene-BC332_00206	Sme2.5_05193.1_g00003.1	MYB family protein	30S ribosomal protein S6 alpha%2C chloroplastic	81	Under-dominance	High-parental dominance
gene-BC332_00517	Sme2.5_00297.1_g00019.1	MYB family protein	hypothetical protein	81	Under-dominance	High-parental dominance
gene-BC332_22781	Sopen10g033340.1	MYB family protein	hypothetical protein	81	Under-dominance	High-parental dominance
gene-BC332_17589	CA06g27890	MYB family protein	Myb-related protein Zm1	81	Under-dominance	Additivity
gene-BC332_33179	Achn012091	MYB family protein	Basic blue protein	81	Under-dominance	Additivity
gene-BC332_01332	Zmw_sc00539.1.g00330.1	MYB family protein	putate carboxylesterase 8	81	Over-dominance	Under-dominance
gene-BC332_04434	CA02g14840	MYB family protein	Transcription factor MYB44	81	Over-dominance	Under-dominance
gene-BC332_09110	Sme2.5_00297.1_g00019.1	MYB family protein	Flavonoid 3'-monooxygenase	81	Over-dominance	Under-dominance
gene-BC332_11532	MDP0000574942	MYB family protein	Protein EXORDIUM-like 2	81	Over-dominance	Under-dominance
gene-BC332_11900	CA00g75700	MYB family protein	Transcriptional actator Myb	81	Over-dominance	Under-dominance
gene-BC332_12046	CA04g19220	MYB family protein	Transcriptional actator Myb	81	Over-dominance	Under-dominance
gene-BC332_14511	CA06g00320	MYB family protein	Transcription factor MYB12	81	Over-dominance	Under-dominance
gene-BC332_15961	Sme2.5_00297.1_g00019.1	MYB family protein	hypothetical protein	81	Over-dominance	Over-dominance
gene-BC332_33881	MDP0000574942	MYB family protein	Protein EXORDIUM-like 3	81	Over-dominance	Low-parental dominance
novel.1111	Sopen05g003120.1	MYB family protein	- && Q56WM6.1 RecName: Full=Rop guanine nucleotide exchange factor 14; Short=AtRopGEF14; AltName: Full=Rho of plants guanine nucleotide exchange factor 14 && PF03759:PRONE (Plant-specific Rop nucleotide exchanger)	81	Over-dominance	Low-parental dominance
novel.553	Sme2.5_05193.1_g00003.1	MYB family protein	- && - && PF03473:MOSC domain	81	Over-dominance	Low-parental dominance
gene-BC332_05719	Sme2.5_00297.1_g00019.1	MYB family protein	Geraniol 8-hydroxylase	81	Over-dominance	High-parental dominance
gene-BC332_23207	Sme2.5_00297.1_g00019.1	MYB family protein	hypothetical protein	81	Over-dominance	High-parental dominance
gene-BC332_01151	Sme2.5_05193.1_g00003.1	MYB family protein	ABC transporter C family member 2	81	Over-dominance	High-parental dominance
gene-BC332_05721	Sme2.5_00297.1_g00019.1	MYB family protein	Geraniol 8-hydroxylase	81	Over-dominance	High-parental dominance
gene-BC332_17123	CA06g24340	MYB family protein	Transcription factor MYB59	81	Over-dominance	High-parental dominance
gene-BC332_17981	Do001369.1	MYB family protein	hypothetical protein	81	Over-dominance	High-parental dominance
gene-BC332_20334	FANhyb_rscf00000921.1.g00001.1	MYB family protein	hypothetical protein	81	Over-dominance	High-parental dominance
gene-BC332_25527	CA10g08070	MYB family protein	Myb-related protein Hv1	81	Over-dominance	High-parental dominance
gene-BC332_27997	Medtr6g015455.1	MYB family protein	hypothetical protein	81	Over-dominance	High-parental dominance
gene-BC332_29023	Sme2.5_00297.1_g00019.1	MYB family protein	Flavonoid 3'%2C5'-hydroxylase	81	Over-dominance	High-parental dominance
gene-BC332_29911	Zpz_sc00650.1.g00320.1.am.mk	MYB family protein	Glycosyltransferase family protein 64 protein C5	81	Over-dominance	High-parental dominance
gene-BC332_33151	Sme2.5_04867.1_g00002.1	MYB family protein	hypothetical protein	81	Over-dominance	High-parental dominance
novel.2172	Manes.01G259600.1.p	MYB family protein	- && Q7XJN0.1 RecName: Full=DEAD-box ATP-dependent RNA helicase 17 && PF00270:DEAD/DEAH box helicase	81	Over-dominance	High-parental dominance
novel.792	Rsa1.0_00145.1_g00025.1	MYB family protein	- && Q8LGJ5.1 RecName: Full=Plant cysteine oxidase 2 && PF07847:Protein of unknown function (DUF1637)	81	Over-dominance	High-parental dominance
gene-BC332_26988	Sme2.5_00297.1_g00019.1	MYB family protein	Cytochrome 98A2	81	Over-dominance	Additivity
gene-BC332_00996	SapurV1A.0816s0150.1.p	MYB family protein	Cell dision cycle 5-like protein	81	Over-dominance	Additivity
gene-BC332_09251	Rsa1.0_00145.1_g00025.1	MYB family protein	hypothetical protein	81	Over-dominance	Additivity
gene-BC332_00096	mrna18416.1-v1.0-hybrid	MYB family protein	hypothetical protein	81	Low-parental dominance	Under-dominance
gene-BC332_12648	Sme2.5_00297.1_g00019.1	MYB family protein	Cytochrome	81	Low-parental dominance	Low-parental dominance
gene-BC332_03690	Sme2.5_00297.1_g00019.1	MYB family protein	Geraniol 8-hydroxylase	81	Low-parental dominance	High-parental dominance
gene-BC332_05005	Ote100033380001	MYB family protein	hypothetical protein	81	Low-parental dominance	High-parental dominance
gene-BC332_09941	GSMUA_Achr8P25970_001	MYB family protein	hypothetical protein	81	Low-parental dominance	High-parental dominance
gene-BC332_18821	Sp_046550_watp.t1	MYB family protein	Peroxidase 28	81	Low-parental dominance	High-parental dominance
novel.5506	Sme2.5_05193.1_g00003.1	MYB family protein	- && Q9FG93.1 RecName: Full=Alpha-mannosidase I MNS4 && -	81	Low-parental dominance	Additivity
novel.5597	Sme2.5_05193.1_g00003.1	MYB family protein	- && - && -	81	Low-parental dominance	Additivity
gene-BC332_20854	Csa05g013080.1	MYB family protein	hypothetical protein	81	High-parental dominance	Low-parental dominance
gene-BC332_16752	Oropetium_20150105_04720A	MYB family protein	hypothetical protein	81	High-parental dominance	High-parental dominance
novel.4186	Sme2.5_05193.1_g00003.1	MYB family protein	- && - && -	81	High-parental dominance	High-parental dominance
novel.7657	MDP0000173550	MYB family protein	- && - && -	81	High-parental dominance	High-parental dominance
novel.2035	Medtr6g015455.1	MYB family protein	- && Q9FI14.1 RecName: Full=Disease resistance protein TAO1; AltName: Full=Protein TARGET OF AVRB OPERATION 1 && PF00931:NB-ARC domain	81	High-parental dominance	High-parental dominance
novel.354	FANhyb_rscf00000921.1.g00001.1	MYB family protein	- && Q498F0.1 RecName: Full=WD repeat-containing protein 44 && -	81	High-parental dominance	High-parental dominance
gene-BC332_03687	Sme2.5_00297.1_g00019.1	MYB family protein	Geraniol 8-hydroxylase	81	High-parental dominance	Additivity
gene-BC332_03688	Sme2.5_00297.1_g00019.1	MYB family protein	Geraniol 8-hydroxylase	81	High-parental dominance	Additivity
gene-BC332_04345	Sme2.5_05193.1_g00003.1	MYB family protein	hypothetical protein	81	High-parental dominance	Additivity
gene-BC332_26754	MDP0000131822	MYB family protein	hypothetical protein	81	High-parental dominance	Additivity
novel.4666	MDP0000173550	MYB family protein	- && - && -	81	High-parental dominance	Additivity
gene-BC332_08485	Sme2.5_00297.1_g00019.1	MYB family protein	Cytochrome 89A9	81	High-parental dominance	Additivity
novel.2542	Medtr6g015455.1	MYB family protein	- && Q40392.1 RecName: Full=TMV resistance protein N && -	81	High-parental dominance	Additivity
novel.3297	PGSC0003DMP400053853	MYB family protein	- && - && -	81	High-parental dominance	Additivity
gene-BC332_11227	Sme2.5_05193.1_g00003.1	MYB family protein	hypothetical protein	81	Additivity	Low-parental dominance
gene-BC332_01152	Sme2.5_05193.1_g00003.1	MYB family protein	ABC transporter C family member 11	81	Additivity	High-parental dominance
novel.7009	LPERR01G31650.2	MYB family protein	- && P21820.1 RecName: Full=Triosephosphate isomerase, cytosolic; Short=TIM; Short=Triose-phosphate isomerase && PF00121:Triosephosphate isomerase	81	Additivity	High-parental dominance
gene-BC332_00101	mrna18416.1-v1.0-hybrid	MYB family protein	hypothetical protein	81	Additivity	Additivity
novel.2202	Sme2.5_05193.1_g00003.1	MYB family protein	- && Q9LV81.1 RecName: Full=Probable mitochondrial adenine nucleotide transporter BTL3; AltName: Full=Adenine nucleotide transporter BT1-like protein 3 && -	81	Additivity	Additivity
novel.357	GSMUA_Achr7P10520_001	MYB family protein	- && - && -	81	Additivity	Additivity
gene-BC332_05545	gw1.6.118.1	C2H2 family protein	Microtubule-associated protein RP/EB family member 1B	77	Under-dominance	Under-dominance
gene-BC332_15084	MDP0000321222	C2H2 family protein	hypothetical protein	77	Under-dominance	Under-dominance
gene-BC332_20067	CA07g18620	C2H2 family protein	hypothetical protein	77	Under-dominance	Under-dominance
gene-BC332_21154	Kalax.0830s0002.1.p	C2H2 family protein	Protein arginine N-methyltransferase PRMT10	77	Under-dominance	Under-dominance
gene-BC332_23073	Achn193931	C2H2 family protein	DnaJ protein P58IPK -like protein	77	Under-dominance	Under-dominance
gene-BC332_25627	PH01004616G0090	C2H2 family protein	hypothetical protein	77	Under-dominance	Under-dominance
gene-BC332_26146	TRIUR3_30162-P1	C2H2 family protein	Sulfoquinovosyl transferase SQD2	77	Under-dominance	Under-dominance
gene-BC332_28395	Jcr4S00100.10	C2H2 family protein	Signal peptide peptidase 1	77	Under-dominance	Under-dominance
gene-BC332_32157	XP_010094455.1	C2H2 family protein	DnaJ -like protein subfamily B member 6	77	Under-dominance	Under-dominance
gene-BC332_28474	NNU_007607-RA	C2H2 family protein	hypothetical protein	77	Under-dominance	Over-dominance
gene-BC332_03079	XP_013906482.1	C2H2 family protein	hypothetical protein	77	Under-dominance	Low-parental dominance
gene-BC332_09299	Zmw_sc06582.1.g00020.1	C2H2 family protein	hypothetical protein	77	Under-dominance	Low-parental dominance
gene-BC332_10099	Gorai.005G137100.8	C2H2 family protein	hypothetical protein	77	Under-dominance	Low-parental dominance
gene-BC332_10594	Itr_sc000026.1_g00057.1	C2H2 family protein	40S ribosomal protein S15a	77	Under-dominance	Low-parental dominance
gene-BC332_10615	Achn022801	C2H2 family protein	40S ribosomal protein S2-1	77	Under-dominance	Low-parental dominance
gene-BC332_10802	Oropetium_20150105_06388A	C2H2 family protein	plasmodesmata callose-binding protein 3	77	Under-dominance	Low-parental dominance
gene-BC332_12584	mrna03614.1-v1.0-hybrid	C2H2 family protein	hypothetical protein	77	Under-dominance	Low-parental dominance
gene-BC332_15770	Itr_sc000026.1_g00057.1	C2H2 family protein	40S ribosomal protein S15a	77	Under-dominance	Low-parental dominance
gene-BC332_15826	Achn022801	C2H2 family protein	40S ribosomal protein S2-1	77	Under-dominance	Low-parental dominance
gene-BC332_17374	mrna03614.1-v1.0-hybrid	C2H2 family protein	hypothetical protein	77	Under-dominance	Low-parental dominance
gene-BC332_21438	XP_010087948.1	C2H2 family protein	Origin of replication complex subunit 5	77	Under-dominance	Low-parental dominance
gene-BC332_22970	AA60G00097	C2H2 family protein	hypothetical protein	77	Under-dominance	Low-parental dominance
gene-BC332_02689	mrna03614.1-v1.0-hybrid	C2H2 family protein	putate beta-D-xylosidase 2	77	Under-dominance	High-parental dominance
gene-BC332_10046	462857618	C2H2 family protein	Thioredoxin-like 4%2C chloroplastic	77	Under-dominance	High-parental dominance
gene-BC332_12215	FANhyb_rscf00001142.1.g00004.1	C2H2 family protein	ATP-dependent zinc metalloprotease FTSH%2C chloroplastic	77	Under-dominance	High-parental dominance
gene-BC332_17734	GSMUA_Achr10P03980_001	C2H2 family protein	BTB/POZ and TAZ domain-containing protein 2	77	Under-dominance	High-parental dominance
gene-BC332_19257	TRIUR3_22095-P1	C2H2 family protein	Protochlorophyllide reductase%2C chloroplastic	77	Under-dominance	High-parental dominance
gene-BC332_20008	TRIUR3_22095-P1	C2H2 family protein	Protochlorophyllide reductase%2C chloroplastic	77	Under-dominance	High-parental dominance
gene-BC332_29324	Oropetium_20150105_06388A	C2H2 family protein	Glucan endo-1%2C3-beta-glucosidase 4	77	Under-dominance	High-parental dominance
novel.257	MDP0000305771	C2H2 family protein	- && - && -	77	Under-dominance	High-parental dominance
gene-BC332_27365	Rsa1.0_06292.1_g00001.1	C2H2 family protein	putate galacturonosyltransferase-like 6	77	Under-dominance	Additivity
gene-BC332_29597	Zmw_sc06582.1.g00020.1	C2H2 family protein	hypothetical protein	77	Over-dominance	Under-dominance
gene-BC332_06211	Zmw_sc06582.1.g00020.1	C2H2 family protein	hypothetical protein	77	Over-dominance	Under-dominance
gene-BC332_15224	OMERI07G16710.1	C2H2 family protein	hypothetical protein	77	Over-dominance	Over-dominance
gene-BC332_16461	CA00g69310	C2H2 family protein	Zinc finger protein 4	77	Over-dominance	Over-dominance
gene-BC332_24678	Pbr031344.1	C2H2 family protein	hypothetical protein	77	Over-dominance	Over-dominance
gene-BC332_25583	Neem_1766_f_3	C2H2 family protein	hypothetical protein	77	Over-dominance	Over-dominance
gene-BC332_32232	Sopen02g036600.1	C2H2 family protein	DUF21 domain-containing protein	77	Over-dominance	Over-dominance
gene-BC332_32543	MDP0000181937	C2H2 family protein	hypothetical protein	77	Over-dominance	Over-dominance
novel.4272	Zmw_sc05604.1.g00100.1	C2H2 family protein	- && Q9SI09.1 RecName: Full=Probable E3 ubiquitin-protein ligase XERICO && PF13639:Ring finger domain	77	Over-dominance	Over-dominance
novel.5365	Zmw_sc05604.1.g00100.1	C2H2 family protein	- && Q9SI09.1 RecName: Full=Probable E3 ubiquitin-protein ligase XERICO && PF13639:Ring finger domain	77	Over-dominance	Over-dominance
gene-BC332_01951	Gh_A09G2473	C2H2 family protein	Superoxide dismutase [Cu-Zn]	77	Over-dominance	Low-parental dominance
gene-BC332_15491	462913740	C2H2 family protein	Short-chain dehydrogenase TIC 32%2C chloroplastic	77	Over-dominance	Low-parental dominance
gene-BC332_21033	FANhyb_rscf00001142.1.g00004.1	C2H2 family protein	ATP-dependent zinc metalloprotease FTSH 4%2C mitochondrial	77	Over-dominance	Low-parental dominance
gene-BC332_08960	mrna26081.1-v1.0-hybrid	C2H2 family protein	hypothetical protein	77	Over-dominance	High-parental dominance
gene-BC332_15343	Zmw_sc01201.1.g00120.1	C2H2 family protein	hypothetical protein	77	Over-dominance	High-parental dominance
gene-BC332_01168	KZV28906.1	C2H2 family protein	Cryptochrome DASH%2C chloroplastic/mitochondrial	77	Over-dominance	High-parental dominance
gene-BC332_11676	Cotton_A_20833_BGI-A2_v1.0	C2H2 family protein	hypothetical protein	77	Over-dominance	High-parental dominance
gene-BC332_11903	WALNUT_00009823-RA	C2H2 family protein	hypothetical protein	77	Over-dominance	High-parental dominance
gene-BC332_14742	CA08g16870	C2H2 family protein	hypothetical protein	77	Over-dominance	High-parental dominance
gene-BC332_17124	Mapoly0032s0007.1.p	C2H2 family protein	Protein UPSTREAM OF FLC	77	Over-dominance	High-parental dominance
gene-BC332_19537	Achn244501	C2H2 family protein	putate galacturonosyltransferase 15	77	Over-dominance	High-parental dominance
gene-BC332_22315	RrC793_p1	C2H2 family protein	hypothetical protein	77	Over-dominance	High-parental dominance
gene-BC332_24581	GSBRNA2T00025691001	C2H2 family protein	Casein kinase I isoform epsilon	77	Over-dominance	High-parental dominance
gene-BC332_26361	Sopen09g003830.1	C2H2 family protein	hypothetical protein	77	Over-dominance	High-parental dominance
novel.3621	XP_016501769.1	C2H2 family protein	- && - && -	77	Over-dominance	High-parental dominance
gene-BC332_00911	Spipo12G0053800	C2H2 family protein	putate acyl-actating enzyme 2	77	Low-parental dominance	Low-parental dominance
gene-BC332_05130	KZV46403.1	C2H2 family protein	Glucan endo-1%2C3-beta-glucosidase 1	77	Low-parental dominance	Low-parental dominance
gene-BC332_12981	Lsa017014	C2H2 family protein	Homoserine kinase	77	Low-parental dominance	Low-parental dominance
gene-BC332_24246	Pbr030871.1	C2H2 family protein	hypothetical protein	77	Low-parental dominance	Low-parental dominance
novel.1496	PSME_00030087-RA	C2H2 family protein	- && F4ILR7.1 RecName: Full=DExH-box ATP-dependent RNA helicase DExH1 && -	77	Low-parental dominance	Low-parental dominance
novel.2453	XP_009790722.1	C2H2 family protein	- && - && -	77	Low-parental dominance	Low-parental dominance
gene-BC332_04722	Pp3c11_480V3.3.p	C2H2 family protein	DEAD-box ATP-dependent RNA helicase 18	77	Low-parental dominance	High-parental dominance
gene-BC332_22082	kfl00029_0340	C2H2 family protein	hypothetical protein	77	Low-parental dominance	High-parental dominance
gene-BC332_27957	EcC042108.10	C2H2 family protein	Non-functional NADPH-dependent codeinone reductase 2	77	Low-parental dominance	Additivity
gene-BC332_13090	XP_009600793.1	C2H2 family protein	Zinc finger protein 4	77	High-parental dominance	Low-parental dominance
novel.6612	Sme2.5_01070.1_g00005.1	C2H2 family protein	- && - && PF00098:Zinc knuckle	77	High-parental dominance	Low-parental dominance
novel.6782	Pbr031344.1	C2H2 family protein	- && Q94A51.1 RecName: Full=U-box domain-containing protein 32; AltName: Full=Plant U-box protein 32 && PF04564:U-box domain	77	High-parental dominance	High-parental dominance
gene-BC332_07021	Spipo12G0053800	C2H2 family protein	Long chain acyl-CoA synthetase 6%2C peroxisomal	77	High-parental dominance	High-parental dominance
gene-BC332_31578	mrna29552.1-v1.0-hybrid	C2H2 family protein	hypothetical protein	77	High-parental dominance	High-parental dominance
gene-BC332_01987	Traes_3DL_8407DBC44.1	C2H2 family protein	DNA polymerase eta	77	High-parental dominance	Additivity
gene-BC332_06713	Sopen02g036600.1	C2H2 family protein	hypothetical protein	77	High-parental dominance	Additivity
gene-BC332_26543	XP_010558920.1	C2H2 family protein	Tropinone reductase 2	77	High-parental dominance	Additivity
novel.4459	Cc10_g10570	C2H2 family protein	- && Q9FIR1.1 RecName: Full=AT-hook motif nuclear-localized protein 8 && -	77	High-parental dominance	Additivity
gene-BC332_28716	mrna03614.1-v1.0-hybrid	C2H2 family protein	hypothetical protein	77	Additivity	Additivity
novel.3343	PH01004616G0090	C2H2 family protein	- && - && -	77	Additivity	Additivity
novel.4800	CA07g20950	C2H2 family protein	- && - && PF13912:C2H2-type zinc finger	77	Additivity	Additivity
gene-BC332_00852	DCAR_019739	C3H family protein	Protein disulfide isomerase-like 1-4	77	Under-dominance	Under-dominance
gene-BC332_04944	Mapoly0012s0190.1.p	C3H family protein	hypothetical protein	77	Under-dominance	Under-dominance
gene-BC332_16257	Sopen06g022470.1	C3H family protein	hypothetical protein	77	Under-dominance	Under-dominance
gene-BC332_19054	DCAR_019739	C3H family protein	Protein disulfide-isomerase like 2-2	77	Under-dominance	Under-dominance
gene-BC332_28173	Csa15g002520.1	C3H family protein	E3 ubiquitin-protein ligase ORTHRUS 2	77	Under-dominance	Under-dominance
gene-BC332_32476	Phvul.006G183400.1	C3H family protein	hypothetical protein	77	Under-dominance	Under-dominance
gene-BC332_20322	mrna31023.1-v1.0-hybrid	C3H family protein	Protein NRT1/ PTR FAMILY 6.3	77	Under-dominance	Over-dominance
gene-BC332_24298	mrna31023.1-v1.0-hybrid	C3H family protein	Protein NRT1/ PTR FAMILY 6.4	77	Under-dominance	Over-dominance
gene-BC332_00653	Neem_9897_f_1	C3H family protein	hypothetical protein	77	Under-dominance	Low-parental dominance
gene-BC332_07159	XP_004485808.1	C3H family protein	hypothetical protein	77	Under-dominance	Low-parental dominance
gene-BC332_13026	676731062	C3H family protein	hypothetical protein	77	Under-dominance	Low-parental dominance
gene-BC332_17102	mrna31023.1-v1.0-hybrid	C3H family protein	Protein NRT1/ PTR FAMILY 2.7	77	Under-dominance	Low-parental dominance
gene-BC332_20694	676783504	C3H family protein	Exonuclease 1	77	Under-dominance	Low-parental dominance
gene-BC332_22122	RrC1188_p3	C3H family protein	NADPH-dependent pterin aldehyde reductase	77	Under-dominance	Low-parental dominance
gene-BC332_22353	Araha.10997s0001.1.p	C3H family protein	hypothetical protein	77	Under-dominance	Low-parental dominance
gene-BC332_26866	CA10g20930	C3H family protein	Zinc finger CCCH domain-containing protein 14	77	Under-dominance	Low-parental dominance
gene-BC332_29817	Zpz_sc02922.1.g00050.1.am.mk	C3H family protein	Dicarboxylate transporter 2.1%2C chloroplastic	77	Under-dominance	Low-parental dominance
gene-BC332_30539	RrC1188_p3	C3H family protein	hypothetical protein	77	Under-dominance	Low-parental dominance
novel.2476	Niben101Scf03753g00007.1	C3H family protein	- && Q38884.2 RecName: Full=Eukaryotic translation initiation factor 3 subunit I; Short=eIF3i; AltName: Full=Eukaryotic translation initiation factor 3 subunit 2; AltName: Full=TGF-beta receptor-interacting protein 1; Short=TRIP-1; AltName: Full=eIF-3-bet	77	Under-dominance	Low-parental dominance
gene-BC332_01957	Oropetium_20150105_23793A	C3H family protein	hypothetical protein	77	Under-dominance	High-parental dominance
gene-BC332_06725	DCAR_019739	C3H family protein	Thioredoxin M-type%2C chloroplastic	77	Under-dominance	High-parental dominance
gene-BC332_11823	KZV23174.1	C3H family protein	Serine carboxypeptidase-like 17	77	Under-dominance	High-parental dominance
gene-BC332_13897	RrC2946_p1	C3H family protein	Phosphoinositide phospholipase C 6	77	Under-dominance	High-parental dominance
gene-BC332_18976	HL.SW.v1.0.G011196.1	C3H family protein	Zinc finger CCCH domain-containing protein 53	77	Under-dominance	High-parental dominance
gene-BC332_19177	FANhyb_rscf00000373.1.g00002.1	C3H family protein	hypothetical protein	77	Under-dominance	High-parental dominance
gene-BC332_19277	Kalax.1731s0001.1.p	C3H family protein	Clathrin light chain 1	77	Under-dominance	High-parental dominance
gene-BC332_28768	CCG001802.1	C3H family protein	hypothetical protein	77	Under-dominance	High-parental dominance
gene-BC332_19157	FANhyb_rscf00000373.1.g00002.1	C3H family protein	G-type lectin S-receptor-like serine/threonine-protein kinase	77	Over-dominance	Under-dominance
gene-BC332_17489	mrna31023.1-v1.0-hybrid	C3H family protein	Protein NRT1/ PTR FAMILY 6.3	77	Over-dominance	Over-dominance
gene-BC332_15490	Oropetium_20150105_23793A	C3H family protein	hypothetical protein	77	Over-dominance	Over-dominance
gene-BC332_08507	kfl00432_0070	C3H family protein	hypothetical protein	77	Over-dominance	Over-dominance
gene-BC332_11451	MDP0000304584	C3H family protein	hypothetical protein	77	Over-dominance	Over-dominance
gene-BC332_17702	XP_013629268.1	C3H family protein	hypothetical protein	77	Over-dominance	Over-dominance
gene-BC332_25454	BGIOSGA023566-PA	C3H family protein	ABC transporter C family member 5	77	Over-dominance	Over-dominance
gene-BC332_33131	Sphfalx0184s0015.1.p	C3H family protein	hypothetical protein	77	Over-dominance	Over-dominance
gene-BC332_02133	Lj3g3v3006550.1	C3H family protein	Splicing factor U2af small subunit B	77	Over-dominance	Low-parental dominance
gene-BC332_05840	KZV23174.1	C3H family protein	Serine carboxypeptidase-like 25	77	Over-dominance	Low-parental dominance
gene-BC332_17035	PSME_00039964-RA	C3H family protein	Cytokinin riboside 5'-monophosphate phosphoribohydrolase LOG4	77	Over-dominance	Low-parental dominance
novel.6765	DCAR_016000	C3H family protein	- && - && -	77	Over-dominance	Low-parental dominance
gene-BC332_30918	KZV23174.1	C3H family protein	hypothetical protein	77	Over-dominance	High-parental dominance
gene-BC332_17349	CA06g25370	C3H family protein	hypothetical protein	77	Over-dominance	High-parental dominance
gene-BC332_23444	Kalax.0605s0014.1.p	C3H family protein	Clathrin light chain 1	77	Over-dominance	High-parental dominance
gene-BC332_15213	RrC2946_p1	C3H family protein	Phosphoinositide phospholipase C 6	77	Over-dominance	High-parental dominance
gene-BC332_16428	NNU_006122-RA	C3H family protein	hypothetical protein	77	Over-dominance	High-parental dominance
gene-BC332_24648	PGSC0003DMP400000692	C3H family protein	Zinc finger CCCH domain-containing protein 49	77	Over-dominance	High-parental dominance
gene-BC332_25976	orange1.1g044941m	C3H family protein	hypothetical protein	77	Over-dominance	High-parental dominance
gene-BC332_27231	XP_015889091.1	C3H family protein	hypothetical protein	77	Over-dominance	High-parental dominance
gene-BC332_28421	Pbr005182.1	C3H family protein	Triacylglycerol lipase 1	77	Over-dominance	High-parental dominance
gene-BC332_29771	PGSC0003DMP400028358	C3H family protein	Zinc finger CCCH domain-containing protein 33	77	Over-dominance	High-parental dominance
gene-BC332_33944	RrC2946_p1	C3H family protein	Phosphoinositide phospholipase C 6	77	Over-dominance	High-parental dominance
novel.1370	BGIOSGA023566-PA	C3H family protein	- && Q9FG08.2 RecName: Full=Histone-lysine N-methyltransferase ATXR4; AltName: Full=Protein SET DOMAIN GROUP 38; AltName: Full=Trithorax-related protein 4; Short=TRX-related protein 4; Flags: Precursor && PF04434:SWIM zinc finger	77	Over-dominance	High-parental dominance
novel.1649	C.cajan_09493	C3H family protein	- && - && -	77	Over-dominance	High-parental dominance
gene-BC332_21409	XP_004485809.1	C3H family protein	hypothetical protein	77	Over-dominance	Additivity
gene-BC332_17100	mrna31023.1-v1.0-hybrid	C3H family protein	Protein NRT1/ PTR FAMILY 2.7	77	Low-parental dominance	Low-parental dominance
novel.2707	FANhyb_rscf00000373.1.g00002.1	C3H family protein	- && Q9SXB4.1 RecName: Full=G-type lectin S-receptor-like serine/threonine-protein kinase At1g11300; Flags: Precursor && PF00954:S-locus glycoprotein domain	77	Low-parental dominance	Low-parental dominance
gene-BC332_01712	CA09g17320	C3H family protein	hypothetical protein	77	Low-parental dominance	High-parental dominance
gene-BC332_08687	orange1.1g044941m	C3H family protein	Caffeic acid 3-O-methyltransferase	77	Low-parental dominance	High-parental dominance
gene-BC332_09992	DCAR_019739	C3H family protein	Triacylglycerol lipase 2	77	Low-parental dominance	High-parental dominance
gene-BC332_11827	KZV23174.1	C3H family protein	Serine carboxypeptidase-like 18	77	Low-parental dominance	High-parental dominance
gene-BC332_24560	CA09g17320	C3H family protein	hypothetical protein	77	Low-parental dominance	High-parental dominance
gene-BC332_04608	XP_011397921.1	C3H family protein	D-tyrosyl-tRNA(Tyr) deacylase 1	77	Low-parental dominance	Additivity
gene-BC332_29446	KZV23174.1	C3H family protein	Serine carboxypeptidase-like 2	77	Low-parental dominance	Additivity
gene-BC332_23697	KZV23174.1	C3H family protein	Serine carboxypeptidase-like 9	77	High-parental dominance	Under-dominance
gene-BC332_28999	Lj3g3v3006550.1	C3H family protein	Splicing factor U2af small subunit A	77	High-parental dominance	Under-dominance
gene-BC332_27300	CA09g17320	C3H family protein	hypothetical protein	77	High-parental dominance	Low-parental dominance
gene-BC332_06601	Mapoly0012s0190.1.p	C3H family protein	Myosin-7	77	High-parental dominance	High-parental dominance
gene-BC332_12199	DCAR_023169	C3H family protein	Prolyl endopeptidase	77	High-parental dominance	High-parental dominance
gene-BC332_17937	CA09g17320	C3H family protein	hypothetical protein	77	High-parental dominance	High-parental dominance
gene-BC332_24505	CA09g17320	C3H family protein	hypothetical protein	77	High-parental dominance	High-parental dominance
gene-BC332_30510	PDK_30s873781g005	C3H family protein	Purple acid phosphatase 13	77	High-parental dominance	High-parental dominance
novel.644	BGIOSGA023566-PA	C3H family protein	- && - && PF04434:SWIM zinc finger	77	High-parental dominance	High-parental dominance
novel.1648	Cc00_g12990	C3H family protein	- && - && -	77	High-parental dominance	High-parental dominance
gene-BC332_11112	MDP0000298233	C3H family protein	hypothetical protein	77	High-parental dominance	Additivity
gene-BC332_24557	CA09g17320	C3H family protein	hypothetical protein	77	High-parental dominance	Additivity
gene-BC332_34356	CA09g17320	C3H family protein	hypothetical protein	77	High-parental dominance	Additivity
gene-BC332_24553	CA09g17320	C3H family protein	hypothetical protein	77	High-parental dominance	Additivity
gene-BC332_24555	CA09g17320	C3H family protein	hypothetical protein	77	High-parental dominance	Additivity
gene-BC332_11824	KZV23174.1	C3H family protein	Serine carboxypeptidase-like 17	77	Additivity	High-parental dominance
gene-BC332_12895	CA09g17320	C3H family protein	hypothetical protein	77	Additivity	High-parental dominance
gene-BC332_06423	CA09g17320	C3H family protein	hypothetical protein	77	Additivity	Additivity
gene-BC332_13533	CCG011654.1	C3H family protein	Potassium transporter 13	77	Additivity	Additivity
gene-BC332_24435	CA09g17320	C3H family protein	hypothetical protein	77	Additivity	Additivity
gene-BC332_24504	CA09g17320	C3H family protein	hypothetical protein	77	Additivity	Additivity
gene-BC332_24566	CA09g17320	C3H family protein	hypothetical protein	77	Additivity	Additivity
gene-BC332_25873	RrC2946_p1	C3H family protein	Phosphoinositide phospholipase C 6	77	Additivity	Additivity
novel.2142	BGIOSGA023566-PA	C3H family protein	- && - && PF04434:SWIM zinc finger	77	Additivity	Additivity
novel.4680	BGIOSGA023566-PA	C3H family protein	- && - && -	77	Additivity	Additivity
novel.5038	Achn368071	C3H family protein	- && P14381.1 RecName: Full=Transposon TX1 uncharacterized 149 kDa protein; AltName: Full=ORF 2 && -	77	Additivity	Additivity
novel.5432	augustus_masked-scaffold06090-abinit-gene-0.2-mRNA-1	C3H family protein	- && - && -	77	Additivity	Additivity
gene-BC332_01511	mrna18483.1-v1.0-hybrid	M-type_MADS family protein	G2/mitotic-specific cyclin S13-6	76	Under-dominance	Under-dominance
gene-BC332_10453	mrna18483.1-v1.0-hybrid	M-type_MADS family protein	Cyclin-B2-4	76	Under-dominance	Under-dominance
gene-BC332_12223	PDK_30s657581g001	M-type_MADS family protein	hypothetical protein	76	Under-dominance	Under-dominance
gene-BC332_12227	mrna18483.1-v1.0-hybrid	M-type_MADS family protein	Cyclin-B2-3	76	Under-dominance	Under-dominance
gene-BC332_15642	mrna18483.1-v1.0-hybrid	M-type_MADS family protein	G2/mitotic-specific cyclin-2	76	Under-dominance	Under-dominance
gene-BC332_26708	mrna18483.1-v1.0-hybrid	M-type_MADS family protein	G2/mitotic-specific cyclin-1	76	Under-dominance	Under-dominance
gene-BC332_26983	mrna18483.1-v1.0-hybrid	M-type_MADS family protein	G2/mitotic-specific cyclin S13-6	76	Under-dominance	Under-dominance
gene-BC332_29233	676773852	M-type_MADS family protein	hypothetical protein	76	Under-dominance	Under-dominance
gene-BC332_20037	Csa04g009800.1	M-type_MADS family protein	60S ribosomal protein L8	76	Under-dominance	Low-parental dominance
gene-BC332_20060	Csa04g009800.1	M-type_MADS family protein	60S ribosomal protein L8	76	Under-dominance	Low-parental dominance
gene-BC332_24638	Achn093911	M-type_MADS family protein	1-aminocyclopropane-1-carboxylate synthase	76	Under-dominance	Low-parental dominance
gene-BC332_30440	Csa13g034280.1	M-type_MADS family protein	Nucleolar protein 58	76	Under-dominance	Low-parental dominance
novel.4031	Zmw_sc03182.1.g00040.1	M-type_MADS family protein	- && Q9SKT3.1 RecName: Full=Secretory carrier-associated membrane protein 1; Short=AtSC1; Short=Secretory carrier membrane protein 1 && PF04144:SCAMP family	76	Under-dominance	Low-parental dominance
novel.5643	KHN26160.1	M-type_MADS family protein	- && Q7LHG5.2 RecName: Full=Transposon Ty3-I Gag-Pol polyprotein; AltName: Full=Gag3-Pol3; AltName: Full=Transposon Ty3-2 TYA-TYB polyprotein; Contains: RecName: Full=Capsid protein; Short=CA; AltName: Full=p24; Contains: RecName: Full=Spacer peptide p3;	76	Under-dominance	Low-parental dominance
gene-BC332_03253	XP_010558909.1	M-type_MADS family protein	hypothetical protein	76	Under-dominance	High-parental dominance
gene-BC332_03751	MDP0000315764	M-type_MADS family protein	hypothetical protein	76	Under-dominance	High-parental dominance
gene-BC332_08249	Pbr006809.1	M-type_MADS family protein	hypothetical protein	76	Under-dominance	High-parental dominance
gene-BC332_16579	NNU_000849-RA	M-type_MADS family protein	Chlorophyll a-b binding protein 4%2C chloroplastic	76	Under-dominance	High-parental dominance
gene-BC332_26790	Vang09g00860.1	M-type_MADS family protein	Transcription initiation factor IIB	76	Under-dominance	High-parental dominance
gene-BC332_28234	676773852	M-type_MADS family protein	putate pentatricopeptide repeat-containing protein	76	Under-dominance	High-parental dominance
gene-BC332_31517	Araip.YZ8MT	M-type_MADS family protein	hypothetical protein	76	Under-dominance	High-parental dominance
novel.7156	Araip.DW8GW	M-type_MADS family protein	- && P42732.1 RecName: Full=30S ribosomal protein S13, chloroplastic; AltName: Full=CS13; Flags: Precursor && PF00416:Ribosomal protein S13/S18	76	Under-dominance	High-parental dominance
novel.3177	Sme2.5_12535.1_g00003.1	M-type_MADS family protein	- && - && -	76	Under-dominance	Additivity
gene-BC332_09159	Araip.0P3IP	M-type_MADS family protein	hypothetical protein	76	Over-dominance	Over-dominance
gene-BC332_18401	Araip.R0AG2	M-type_MADS family protein	hypothetical protein	76	Over-dominance	Over-dominance
gene-BC332_12520	Araip.TBD1T	M-type_MADS family protein	Microtubule-associated protein 70-1	76	Over-dominance	Low-parental dominance
gene-BC332_03874	Gh_Sca005019G01	M-type_MADS family protein	hypothetical protein	76	Over-dominance	Low-parental dominance
gene-BC332_07089	Tp57577_TGAC_v2_mRNA22346	M-type_MADS family protein	ABC transporter C family member 8	76	Over-dominance	Low-parental dominance
gene-BC332_19319	Achn093911	M-type_MADS family protein	Tyrosine aminotransferase	76	Over-dominance	Low-parental dominance
gene-BC332_22197	PSME_00043819-RA	M-type_MADS family protein	Oligopeptide transporter 3	76	Over-dominance	Low-parental dominance
gene-BC332_29905	Araip.16HZH	M-type_MADS family protein	hypothetical protein	76	Over-dominance	Low-parental dominance
novel.1839	Dca52167.1	M-type_MADS family protein	- && F4I366.1 RecName: Full=DNA-directed RNA polymerase I subunit 2; AltName: Full=DNA-directed RNA polymerase I subunit RPA2; Short=DNA polymerase I subunit A2; AltName: Full=Nuclear RNA polymerase A2 && -	76	Over-dominance	Low-parental dominance
novel.5565	Dca52167.1	M-type_MADS family protein	- && P04146.3 RecName: Full=Copia protein; AltName: Full=Gag-int-pol protein; Contains: RecName: Full=Copia VLP protein; Contains: RecName: Full=Copia protease && PF07727:Reverse transcriptase (RNA-dependent DNA polymerase)	76	Over-dominance	Low-parental dominance
novel.6753	Sme2.5_12535.1_g00003.1	M-type_MADS family protein	- && Q9LYS2.2 RecName: Full=ABC transporter C family member 10; Short=ABC transporter ABCC.10; Short=AtABCC10; AltName: Full=ATP-energized glutathione S-conjugate pump 14; AltName: Full=Glutathione S-conjugate-transporting ATPase 14; AltName: Full=Multidr	76	Over-dominance	Low-parental dominance
novel.6920	Csa06g026430.1	M-type_MADS family protein	- && Q8GYE0.2 RecName: Full=SEC12-like protein 1; AltName: Full=Protein PHOSPHATE TRANSPORTER TRAFFIC FACILITATOR 1; Short=PHF-1 && -	76	Over-dominance	Low-parental dominance
novel.7385	Achn270051	M-type_MADS family protein	- && F4JJT9.1 RecName: Full=Aspartate--tRNA ligase, chloroplastic/mitochondrial; AltName: Full=Aspartyl-tRNA synthetase; Short=AspRS && -	76	Over-dominance	High-parental dominance
gene-BC332_05656	Sme2.5_06967.1_g00001.1	M-type_MADS family protein	Formin-like protein 1	76	Over-dominance	High-parental dominance
gene-BC332_12104	mrna27834.1-v1.0-hybrid	M-type_MADS family protein	hypothetical protein	76	Over-dominance	High-parental dominance
gene-BC332_18506	PSME_00045960-RA	M-type_MADS family protein	DNA mismatch repair protein MSH7	76	Over-dominance	High-parental dominance
gene-BC332_18990	678320713	M-type_MADS family protein	Cytochrome and DOMON domain-containing protein	76	Over-dominance	High-parental dominance
gene-BC332_24974	Achn093911	M-type_MADS family protein	Tyrosine aminotransferase	76	Over-dominance	High-parental dominance
gene-BC332_30158	PSME_00040474-RA	M-type_MADS family protein	putate receptor protein kinase TMK1	76	Over-dominance	High-parental dominance
gene-BC332_34475	Tp57577_TGAC_v2_mRNA22346	M-type_MADS family protein	ABC transporter B family member 27	76	Over-dominance	High-parental dominance
novel.2436	LOC_Os11g12360.1	M-type_MADS family protein	- && - && -	76	Over-dominance	High-parental dominance
novel.408	Eucgr.E02489.1.p	M-type_MADS family protein	- && Q9FUR2.2 RecName: Full=Type I inositol polyphosphate 5-phosphatase 2; Short=At5PTase2 && -	76	Over-dominance	High-parental dominance
novel.3796	LOC_Os11g12360.1	M-type_MADS family protein	- && - && -	76	Over-dominance	Additivity
gene-BC332_01436	Araip.R0AG2	M-type_MADS family protein	hypothetical protein	76	Over-dominance	Additivity
novel.3172	Sme2.5_12535.1_g00003.1	M-type_MADS family protein	- && - && -	76	Low-parental dominance	Over-dominance
gene-BC332_01163	XP_016436586.1	M-type_MADS family protein	Patatin-17	76	Low-parental dominance	Low-parental dominance
gene-BC332_20147	mrna18483.1-v1.0-hybrid	M-type_MADS family protein	Cyclin-B1-3	76	Low-parental dominance	High-parental dominance
gene-BC332_33898	Csa14g037510.1	M-type_MADS family protein	hypothetical protein	76	Low-parental dominance	Additivity
gene-BC332_25077	Achn093911	M-type_MADS family protein	Tyrosine aminotransferase	76	High-parental dominance	Low-parental dominance
novel.3312	676773852	M-type_MADS family protein	- && P93008.1 RecName: Full=DEAD-box ATP-dependent RNA helicase 21 && PF00270:DEAD/DEAH box helicase	76	High-parental dominance	Low-parental dominance
novel.4641	LOC_Os11g12360.1	M-type_MADS family protein	- && - && -	76	High-parental dominance	High-parental dominance
novel.5846	Dca52167.1	M-type_MADS family protein	- && P10978.1 RecName: Full=Retrovirus-related Pol polyprotein from transposon TNT 1-94; Includes: RecName: Full=Protease; Includes: RecName: Full=Reverse transcriptase; Includes: RecName: Full=Endonuclease && PF07727:Reverse transcriptase (RNA-dependent	76	High-parental dominance	High-parental dominance
novel.7391	Achn270051	M-type_MADS family protein	- && F4JJT9.1 RecName: Full=Aspartate--tRNA ligase, chloroplastic/mitochondrial; AltName: Full=Aspartyl-tRNA synthetase; Short=AspRS && -	76	High-parental dominance	High-parental dominance
novel.868	XP_016443217.1	M-type_MADS family protein	- && - && -	76	High-parental dominance	High-parental dominance
gene-BC332_11017	PGSC0003DMP400032740	M-type_MADS family protein	MADS-box transcription factor 26	76	High-parental dominance	High-parental dominance
gene-BC332_11708	PSME_00043819-RA	M-type_MADS family protein	Oligopeptide transporter 6	76	High-parental dominance	High-parental dominance
gene-BC332_31034	676753166	M-type_MADS family protein	hypothetical protein	76	High-parental dominance	High-parental dominance
novel.2245	Eucgr.E02489.1.p	M-type_MADS family protein	- && Q8H0Z6.1 RecName: Full=Type inositol polyphosphate 5-phosphatase 3; Short=At5PTase3 && -	76	High-parental dominance	High-parental dominance
novel.2381	Dca52167.1	M-type_MADS family protein	- && P92519.1 RecName: Full=Uncharacterized mitochondrial protein AtMg00810; AltName: Full=ORF240b && PF07727:Reverse transcriptase (RNA-dependent DNA polymerase)	76	High-parental dominance	High-parental dominance
novel.6275	LOC_Os11g12360.1	M-type_MADS family protein	- && P37707.1 RecName: Full=B2 protein && -	76	High-parental dominance	Additivity
gene-BC332_22932	Achn093911	M-type_MADS family protein	Nicotianamine aminotransferase A	76	High-parental dominance	Additivity
gene-BC332_34845	Achn093911	M-type_MADS family protein	putate aminotransferase TAT2	76	High-parental dominance	Additivity
novel.2340	Dca52167.1	M-type_MADS family protein	- && - && -	76	High-parental dominance	Additivity
novel.4706	LOC_Os11g12360.1	M-type_MADS family protein	- && - && -	76	Additivity	Low-parental dominance
gene-BC332_01006	Vradi11g00410.1	M-type_MADS family protein	hypothetical protein	76	Additivity	High-parental dominance
novel.4020	XP_009799760.1	M-type_MADS family protein	- && - && -	76	Additivity	High-parental dominance
novel.7100	Dca52167.1	M-type_MADS family protein	- && P10978.1 RecName: Full=Retrovirus-related Pol polyprotein from transposon TNT 1-94; Includes: RecName: Full=Protease; Includes: RecName: Full=Reverse transcriptase; Includes: RecName: Full=Endonuclease && -	76	Additivity	High-parental dominance
novel.1973	LOC_Os11g12360.1	M-type_MADS family protein	- && Q5RFB0.2 RecName: Full=Aminoacylase-1; Short=ACY-1; AltName: Full=N-acyl-L-amino-acid amidohydrolase && PF01546:Peptidase family M20/M25/M40	76	Additivity	Additivity
novel.2036	Dca52167.1	M-type_MADS family protein	- && P92519.1 RecName: Full=Uncharacterized mitochondrial protein AtMg00810; AltName: Full=ORF240b && PF07727:Reverse transcriptase (RNA-dependent DNA polymerase)	76	Additivity	Additivity
novel.2164	Sopen06g014360.1	M-type_MADS family protein	- && - && -	76	Additivity	Additivity
novel.2917	Sme2.5_12535.1_g00003.1	M-type_MADS family protein	- && Q0JHU5.1 RecName: Full=Elicitor-response protein 1; Short=OsERG1; AltName: Full=17 kDa phloem protein; AltName: Full=Fungal elicitor immediate early-response gene 1 protein; Short=FIERG1; AltName: Full=RPP17 >A2WWV5.2 RecName: Full=Elicitor-respo	76	Additivity	Additivity
novel.6775	LOC_Os11g12360.1	M-type_MADS family protein	- && - && PF12937:F-box-like	76	Additivity	Additivity
novel.7356	XP_016454637.1	M-type_MADS family protein	- && P92519.1 RecName: Full=Uncharacterized mitochondrial protein AtMg00810; AltName: Full=ORF240b && -	76	Additivity	Additivity
gene-BC332_34383	Potri.012G137500.1	FAR1 family protein	hypothetical protein	64	Under-dominance	Under-dominance
gene-BC332_06931	mrna13309.1-v1.0-hybrid	FAR1 family protein	Protein IQ-DOMAIN 31	64	Under-dominance	Over-dominance
gene-BC332_16694	PDK_30s6550916g003	FAR1 family protein	Serine/threonine protein phosphatase 2A 55 kDa regulatory subunit B beta isoform	64	Under-dominance	Over-dominance
gene-BC332_10315	Aradu.9Q4WD	FAR1 family protein	Thioredoxin reductase 1	64	Under-dominance	Low-parental dominance
gene-BC332_14456	MDP0000218395	FAR1 family protein	60S ribosomal protein L6	64	Under-dominance	Low-parental dominance
gene-BC332_15805	MDP0000533379	FAR1 family protein	Replication factor C subunit 5	64	Under-dominance	Low-parental dominance
gene-BC332_20212	Aradu.M0KHJ	FAR1 family protein	hypothetical protein	64	Under-dominance	Low-parental dominance
gene-BC332_25919	Peinf101Scf00301g02015.1	FAR1 family protein	Steroid 5-alpha-reductase DET2	64	Under-dominance	Low-parental dominance
gene-BC332_26598	LOC_Os11g05340.1	FAR1 family protein	hypothetical protein	64	Under-dominance	Low-parental dominance
gene-BC332_27219	KN538871.1_FGP005	FAR1 family protein	3-isopropylmalate dehydrogenase%2C chloroplastic	64	Under-dominance	Low-parental dominance
gene-BC332_29197	EMT26392	FAR1 family protein	Cell dision cycle protein 48 -like protein	64	Under-dominance	Low-parental dominance
gene-BC332_29600	MDP0000218395	FAR1 family protein	60S ribosomal protein L6-1	64	Under-dominance	Low-parental dominance
gene-BC332_02738	Peaxi162Scf00170g01227.1	FAR1 family protein	hypothetical protein	64	Under-dominance	High-parental dominance
gene-BC332_04093	SapurV1A.0196s0190.1.p	FAR1 family protein	putate ribose-5-phosphate isomerase 4%2C chloroplastic	64	Under-dominance	High-parental dominance
gene-BC332_05935	Itr_sc004833.1_g00001.1	FAR1 family protein	Glucan endo-1%2C3-beta-glucosidase	64	Under-dominance	High-parental dominance
gene-BC332_12757	Phvul.002G126900.1	FAR1 family protein	Alpha-glucosidase	64	Under-dominance	High-parental dominance
gene-BC332_13675	Potri.006G039800.1	FAR1 family protein	putate ribose-5-phosphate isomerase 2	64	Under-dominance	High-parental dominance
gene-BC332_16351	KHN11326.1	FAR1 family protein	hypothetical protein	64	Under-dominance	High-parental dominance
gene-BC332_18663	MDP0000408462	FAR1 family protein	hypothetical protein	64	Under-dominance	High-parental dominance
gene-BC332_22529	FANhyb_rscf00000068.1.g00012.1	FAR1 family protein	putate fructose-bisphosphate aldolase 2%2C chloroplastic	64	Under-dominance	High-parental dominance
novel.4404	Achn032341	FAR1 family protein	- && Q8GYN9.2 RecName: Full=1,4-dihydroxy-2-naphthoyl-CoA synthase, peroxisomal; Short=DHNS; AltName: Full=Enoyl-CoA hydratase/isomerase D; Short=ECHID; AltName: Full=Naphthoate synthase && PF00378:Enoyl-CoA hydratase/isomerase	64	Under-dominance	High-parental dominance
novel.495	Peinf101Scf00421g16012.1	FAR1 family protein	- && O65020.2 RecName: Full=Ethylene-overproduction protein 1; AltName: Full=Protein ETHYLENE OVERPRODUCER 1; Short=Protein ETO1 && -	64	Under-dominance	High-parental dominance
gene-BC332_18379	MDP0000300795	FAR1 family protein	Histone-lysine N-methyltransferase ASHH1	64	Over-dominance	Under-dominance
gene-BC332_03596	Jcr4S00206.70	FAR1 family protein	hypothetical protein	64	Over-dominance	Over-dominance
gene-BC332_05045	TRIUR3_27758-P1	FAR1 family protein	hypothetical protein	64	Over-dominance	Over-dominance
gene-BC332_05148	Jcr4S00206.70	FAR1 family protein	hypothetical protein	64	Over-dominance	Over-dominance
gene-BC332_22632	MDP0000318339	FAR1 family protein	Calcium-dependent protein kinase 5	64	Over-dominance	Over-dominance
gene-BC332_30079	Peinf101Scf00301g02015.1	FAR1 family protein	hypothetical protein	64	Over-dominance	Over-dominance
novel.5951	LOC_Os11g05340.1	FAR1 family protein	- && Q9LFA4.1 RecName: Full=IQ domain-containing protein IQM3; AltName: Full=IQ motif-containing protein 3 && -	64	Over-dominance	Over-dominance
gene-BC332_14135	Medtr7g113010.1	FAR1 family protein	hypothetical protein	64	Over-dominance	Low-parental dominance
gene-BC332_00972	Phvul.002G126900.1	FAR1 family protein	hypothetical protein	64	Over-dominance	Low-parental dominance
gene-BC332_09366	MDP0000259867	FAR1 family protein	Calcium-binding allergen Ole e 8	64	Over-dominance	Low-parental dominance
gene-BC332_12351	676720782	FAR1 family protein	hypothetical protein	64	Over-dominance	Low-parental dominance
novel.12	EMT26392	FAR1 family protein	- && Q6NW58.2 RecName: Full=Spastin && PF00004:ATPase family associated with various cellular actities (AAA)	64	Over-dominance	Low-parental dominance
novel.1528	MDP0000220752	FAR1 family protein	- && Q9XHS0.1 RecName: Full=40S ribosomal protein S12 && -	64	Over-dominance	Low-parental dominance
gene-BC332_08662	BGIOSGA009723-PA	FAR1 family protein	Metal-nicotianamine transporter YSL1	64	Over-dominance	High-parental dominance
gene-BC332_04088	MDP0000247737	FAR1 family protein	putate UDP-arabinose 4-epimerase 3	64	Over-dominance	High-parental dominance
gene-BC332_14139	Medtr7g113010.1	FAR1 family protein	hypothetical protein	64	Over-dominance	High-parental dominance
gene-BC332_17823	Peinf101Scf00594g17028.1	FAR1 family protein	hypothetical protein	64	Over-dominance	High-parental dominance
gene-BC332_30211	676720782	FAR1 family protein	hypothetical protein	64	Over-dominance	High-parental dominance
gene-BC332_29009	MDP0000247737	FAR1 family protein	UDP-D-apiose/UDP-D-xylose synthase	64	Low-parental dominance	Low-parental dominance
gene-BC332_03075	LOC_Os02g29640.1	FAR1 family protein	Protein ECERIFERUM 1	64	Low-parental dominance	High-parental dominance
gene-BC332_08141	Peaxi162Scf00170g01227.1	FAR1 family protein	hypothetical protein	64	Low-parental dominance	High-parental dominance
gene-BC332_28754	Phvul.002G126900.1	FAR1 family protein	putate alpha-xylosidase 2	64	Low-parental dominance	High-parental dominance
gene-BC332_26777	676720782	FAR1 family protein	putate calcium-binding protein CML35	64	High-parental dominance	Low-parental dominance
novel.2960	678329443	FAR1 family protein	- && Q9C8C1.1 RecName: Full=Protein LIKE COV 2 && -	64	High-parental dominance	Low-parental dominance
novel.6398	Dca43462.1	FAR1 family protein	- && - && -	64	High-parental dominance	Low-parental dominance
gene-BC332_24732	mrna13309.1-v1.0-hybrid	FAR1 family protein	hypothetical protein	64	High-parental dominance	Low-parental dominance
gene-BC332_12571	Itr_sc003902.1_g00001.1	FAR1 family protein	Zinc-metallopeptidase%2C peroxisomal	64	High-parental dominance	High-parental dominance
gene-BC332_15397	Araip.RF9E5	FAR1 family protein	hypothetical protein	64	High-parental dominance	High-parental dominance
novel.439	MDP0000308670	FAR1 family protein	- && Q9SZL7.2 RecName: Full=Protein FAR1-RELATED SEQUENCE 9 && PF04434:SWIM zinc finger	64	High-parental dominance	High-parental dominance
novel.4448	Zosma45g00810.1	FAR1 family protein	- && - && -	64	High-parental dominance	High-parental dominance
novel.4483	Sme2.5_04901.1_g00002.1	FAR1 family protein	- && - && -	64	High-parental dominance	High-parental dominance
gene-BC332_12570	Itr_sc003902.1_g00001.1	FAR1 family protein	Zinc-metallopeptidase%2C peroxisomal	64	High-parental dominance	Additivity
gene-BC332_16151	Potri.012G137500.1	FAR1 family protein	hypothetical protein	64	High-parental dominance	Additivity
gene-BC332_23154	EMT05641	FAR1 family protein	putate LRR receptor-like serine/threonine-protein kinase	64	High-parental dominance	Additivity
gene-BC332_26668	Itr_sc004833.1_g00001.1	FAR1 family protein	Glucan endo-1%2C3-beta-glucosidase	64	High-parental dominance	Additivity
gene-BC332_10128	Potri.012G137500.1	FAR1 family protein	GDSL esterase/lipase	64	Additivity	High-parental dominance
gene-BC332_10318	Jcr4S00206.70	FAR1 family protein	hypothetical protein	64	Additivity	High-parental dominance
gene-BC332_34426	TRIUR3_27758-P1	FAR1 family protein	hypothetical protein	64	Additivity	High-parental dominance
novel.1725	Dca46628.1	FAR1 family protein	- && - && -	64	Additivity	High-parental dominance
novel.6547	EMT26392	FAR1 family protein	- && Q9ZNT0.1 RecName: Full=Protein SUPPRESSOR OF K(+) TRANSPORT GROWTH DEFECT 1; Short=AtSKD1; AltName: Full=Protein VACUOLAR PROTEIN SORTING 4 && PF00004:ATPase family associated with various cellular actities (AAA)	64	Additivity	High-parental dominance
gene-BC332_03468	Sme2.5_06925.1_g00002.1	FAR1 family protein	hypothetical protein	64	Additivity	Additivity
gene-BC332_14136	Medtr7g113010.1	FAR1 family protein	hypothetical protein	64	Additivity	Additivity
gene-BC332_11633	Jcr4S00284.50	bZIP family protein	Kinesin-like protein FRA1	63	Under-dominance	Under-dominance
gene-BC332_12126	OMERI06G27590.3	bZIP family protein	Endoplasmin -like protein	63	Under-dominance	Under-dominance
gene-BC332_13952	DCAR_026693	bZIP family protein	Chaperonin CPN60%2C mitochondrial	63	Under-dominance	Under-dominance
gene-BC332_13953	DCAR_026693	bZIP family protein	Chaperonin CPN60-2%2C mitochondrial	63	Under-dominance	Under-dominance
gene-BC332_18417	OMERI06G27590.3	bZIP family protein	hypothetical protein	63	Under-dominance	Under-dominance
gene-BC332_24587	Itr_sc000455.1_g00007.1	bZIP family protein	Rac-like GTP-binding protein ARAC7	63	Under-dominance	Under-dominance
gene-BC332_26874	Oropetium_20150105_17443A	bZIP family protein	Protein QUIRKY	63	Under-dominance	Under-dominance
gene-BC332_31963	Oropetium_20150105_17443A	bZIP family protein	hypothetical protein	63	Under-dominance	Under-dominance
gene-BC332_07747	KXZ43161.1	bZIP family protein	hypothetical protein	63	Under-dominance	Low-parental dominance
gene-BC332_14837	XP_010103855.1	bZIP family protein	60S ribosomal protein L10	63	Under-dominance	Low-parental dominance
gene-BC332_17231	Gh_A13G1934	bZIP family protein	60S ribosomal protein L10a-3	63	Under-dominance	Low-parental dominance
gene-BC332_28896	Gh_D13G2331	bZIP family protein	60S ribosomal protein L10a	63	Under-dominance	Low-parental dominance
gene-BC332_31831	GSBRNA2T00109513001	bZIP family protein	hypothetical protein	63	Under-dominance	Low-parental dominance
gene-BC332_31957	MDP0000231542	bZIP family protein	hypothetical protein	63	Under-dominance	Low-parental dominance
gene-BC332_05639	Zjn_sc00014.1.g05730.1.am.mk	bZIP family protein	hypothetical protein	63	Under-dominance	High-parental dominance
gene-BC332_09542	678365117	bZIP family protein	hypothetical protein	63	Under-dominance	High-parental dominance
gene-BC332_22018	678365117	bZIP family protein	putate germin-like protein 2-1	63	Under-dominance	High-parental dominance
gene-BC332_31882	PDK_30s976561g001	bZIP family protein	putate transmembrane ascorbate ferrireductase 3	63	Under-dominance	High-parental dominance
gene-BC332_33443	Itr_sc000455.1_g00007.1	bZIP family protein	Rac-like GTP-binding protein ARAC3	63	Under-dominance	High-parental dominance
gene-BC332_19829	Do001279.1	bZIP family protein	Heat shock protein 90-2	63	Over-dominance	Under-dominance
gene-BC332_33276	Gh_D05G0105	bZIP family protein	Potassium channel AKT2	63	Over-dominance	Over-dominance
gene-BC332_10245	Zpz_sc02648.1.g00060.1.am.mk	bZIP family protein	hypothetical protein	63	Over-dominance	Low-parental dominance
gene-BC332_28584	Zpz_sc00550.1.g00120.1.am.mk	bZIP family protein	3-ketoacyl-CoA synthase 3	63	Over-dominance	Low-parental dominance
gene-BC332_32511	Zpz_sc00812.1.g00250.1.am.mk	bZIP family protein	F-box/kelch-repeat protein	63	Over-dominance	Low-parental dominance
gene-BC332_32865	KN538686.1_FGP163	bZIP family protein	Glucose-6-phosphate 1-dehydrogenase%2C chloroplastic	63	Over-dominance	Low-parental dominance
gene-BC332_30328	CA12g10100	bZIP family protein	Transcription factor TGA7	63	Over-dominance	High-parental dominance
gene-BC332_00286	MDP0000239688	bZIP family protein	putate glucose-6-phosphate 1-epimerase	63	Over-dominance	High-parental dominance
gene-BC332_11947	CA04g18620	bZIP family protein	ABSCISIC ACID-INSENSITE 5-like protein 5	63	Over-dominance	High-parental dominance
gene-BC332_13065	Sme2.5_02745.1_g00006.1	bZIP family protein	hypothetical protein	63	Over-dominance	High-parental dominance
gene-BC332_21394	CA08g08010	bZIP family protein	Common plant regulatory factor 1	63	Over-dominance	High-parental dominance
gene-BC332_22260	CA00g41470	bZIP family protein	ABSCISIC ACID-INSENSITE 5-like protein 7	63	Over-dominance	High-parental dominance
gene-BC332_26939	678365117	bZIP family protein	Germin-like protein subfamily 1 member 7	63	Over-dominance	High-parental dominance
novel.5946	XP_016477078.1	bZIP family protein	- && - && -	63	Over-dominance	High-parental dominance
novel.5614	GSBRNA2T00109513001	bZIP family protein	- && Q93VT8.1 RecName: Full=ATP-citrate synthase beta chain protein 1; Short=ATP-citrate synthase B-1; AltName: Full=ATP-citrate lyase B-1; AltName: Full=Citrate cleavage enzyme B-1 && -	63	Over-dominance	Additivity
gene-BC332_11815	Zjn_sc00014.1.g05730.1.am.mk	bZIP family protein	Protein PHLOEM PROTEIN 2-LIKE A10	63	Over-dominance	Additivity
novel.5725	LOC_Os12g06010.1	bZIP family protein	- && - && PF00075:RNase H	63	Over-dominance	Additivity
gene-BC332_08251	Do001279.1	bZIP family protein	Heat shock protein 82	63	Low-parental dominance	Under-dominance
gene-BC332_05393	Zmw_sc05871.1.g00020.1	bZIP family protein	Mannan endo-1%2C4-beta-mannosidase 7	63	Low-parental dominance	Over-dominance
gene-BC332_12897	XP_011077930.1	bZIP family protein	Cell dision protein FtsZ	63	Low-parental dominance	Low-parental dominance
gene-BC332_14930	Zpz_sc00550.1.g00120.1.am.mk	bZIP family protein	3-ketoacyl-CoA synthase 3	63	Low-parental dominance	Low-parental dominance
gene-BC332_22060	678365117	bZIP family protein	Nectarin-1	63	Low-parental dominance	Low-parental dominance
novel.524	OMERI06G27590.3	bZIP family protein	- && P51819.1 RecName: Full=Heat shock protein 83 && -	63	Low-parental dominance	High-parental dominance
gene-BC332_01806	KHN27651.1	bZIP family protein	hypothetical protein	63	Low-parental dominance	Additivity
gene-BC332_15714	Gh_D05G2870	bZIP family protein	hypothetical protein	63	Low-parental dominance	Additivity
gene-BC332_07648	Do001279.1	bZIP family protein	Heat shock protein 81-3	63	High-parental dominance	Low-parental dominance
novel.2938	Do016806.1	bZIP family protein	- && Q8LPN7.1 RecName: Full=E3 ubiquitin-protein ligase RING1-like; AltName: Full=RING finger protein 1 && PF13639:Ring finger domain	63	High-parental dominance	Low-parental dominance
gene-BC332_10246	Zpz_sc02648.1.g00060.1.am.mk	bZIP family protein	hypothetical protein	63	High-parental dominance	High-parental dominance
gene-BC332_12152	OMERI06G27590.3	bZIP family protein	Endoplasmin -like protein	63	High-parental dominance	High-parental dominance
gene-BC332_27695	Achn254431	bZIP family protein	hypothetical protein	63	High-parental dominance	High-parental dominance
gene-BC332_02064	Gh_D05G0105	bZIP family protein	Potassium channel AKT1	63	High-parental dominance	Additivity
gene-BC332_02291	Oropetium_20150105_17443A	bZIP family protein	Vacuolar protein sorting-associated protein 35B	63	High-parental dominance	Additivity
gene-BC332_26622	Lus10021031	bZIP family protein	hypothetical protein	63	High-parental dominance	Additivity
novel.4355	Oropetium_20150105_17443A	bZIP family protein	- && Q9FL59.1 RecName: Full=FT-interacting protein 1 && -	63	High-parental dominance	Additivity
gene-BC332_19002	Peinf101Scf00339g00010.1	bZIP family protein	UDP-glucose 6-dehydrogenase 4	63	Additivity	High-parental dominance
gene-BC332_26349	OMERI01G34960.3	bZIP family protein	F-box/LRR-repeat protein	63	Additivity	High-parental dominance
novel.178	Kaladp0020s0147.1.p	bZIP family protein	- && Q93XX5.1 RecName: Full=PI-PLC X domain-containing protein At5g67130; Flags: Precursor && -	63	Additivity	High-parental dominance
novel.4672	Sme2.5_00121.1_g00011.1	bZIP family protein	- && - && -	63	Additivity	High-parental dominance
gene-BC332_14895	CA06g07980	bZIP family protein	hypothetical protein	63	Additivity	Additivity
gene-BC332_28868	Cotton_A_13887_BGI-A2_v1.0	bZIP family protein	Poly [ADP-ribose] polymerase 3	63	Additivity	Additivity
novel.3697	GSMUA_Achr8P21670_001	bZIP family protein	- && Q9LHI0.1 RecName: Full=NADH dehydrogenase [ubiquinone] 1 alpha subcomplex subunit 6 && -	63	Additivity	Additivity
novel.5045	CA10g18960	bZIP family protein	- && O24160.1 RecName: Full=TGACG-sequence-specific DNA-binding protein TGA-2.1; Short=TGA2.1 && PF14144:Seed dormancy control	63	Additivity	Additivity
novel.5376	Sme2.5_00121.1_g00011.1	bZIP family protein	- && - && -	63	Additivity	Additivity
novel.6839	Sme2.5_00121.1_g00011.1	bZIP family protein	- && - && -	63	Additivity	Additivity
gene-BC332_16956	MDP0000287321	GRAS family protein	60S ribosomal protein L27	55	Under-dominance	Under-dominance
novel.3179	TRIUR3_17264-P1	GRAS family protein	- && Q9SJL0.1 RecName: Full=UDP-glycosyltransferase 86A1 && PF00201:UDP-glucoronosyl and UDP-glucosyl transferase	55	Under-dominance	Over-dominance
gene-BC332_04466	CA02g25090	GRAS family protein	Scarecrow-like protein 32	55	Under-dominance	Low-parental dominance
gene-BC332_09475	Gh_D02G0276	GRAS family protein	60S ribosomal protein L37-3	55	Under-dominance	Low-parental dominance
gene-BC332_14351	Vradi0332s00260.1	GRAS family protein	60S ribosomal protein L38	55	Under-dominance	Low-parental dominance
gene-BC332_16456	MDP0000315706	GRAS family protein	Bifunctional glutamate/proline--tRNA ligase	55	Under-dominance	Low-parental dominance
gene-BC332_17523	GRMZM2G408012_P01	GRAS family protein	Guanine nucleotide-binding protein-like NSN1	55	Under-dominance	Low-parental dominance
gene-BC332_17613	MDP0000287321	GRAS family protein	60S ribosomal protein L27	55	Under-dominance	Low-parental dominance
gene-BC332_18850	MDP0000287321	GRAS family protein	60S ribosomal protein L27	55	Under-dominance	Low-parental dominance
gene-BC332_29845	Vradi0332s00260.1	GRAS family protein	60S ribosomal protein L38	55	Under-dominance	Low-parental dominance
novel.4274	TRIUR3_17264-P1	GRAS family protein	- && U3U992.1 RecName: Full=7-deoxyloganetic acid glucosyltransferase; AltName: Full=UDP-glucose glucosyltransferase 8; Short=CrUGT8; AltName: Full=UDP-glycosyltransferase 709C2 && PF00201:UDP-glucoronosyl and UDP-glucosyl transferase	55	Under-dominance	Low-parental dominance
gene-BC332_07113	MDP0000464809	GRAS family protein	hypothetical protein	55	Under-dominance	High-parental dominance
gene-BC332_19031	KZV34808.1	GRAS family protein	putate plastidic glucose transporter 1	55	Under-dominance	High-parental dominance
gene-BC332_27553	DCAR_003235	GRAS family protein	putate inacte purple acid phosphatase 27	55	Under-dominance	High-parental dominance
novel.5165	TRIUR3_17264-P1	GRAS family protein	- && Q9SJL0.1 RecName: Full=UDP-glycosyltransferase 86A1 && PF00201:UDP-glucoronosyl and UDP-glucosyl transferase	55	Under-dominance	High-parental dominance
gene-BC332_15366	CA06g07510	GRAS family protein	hypothetical protein	55	Over-dominance	Under-dominance
gene-BC332_02810	Gh_D08G0309	GRAS family protein	hypothetical protein	55	Over-dominance	Over-dominance
gene-BC332_05351	676752178	GRAS family protein	hypothetical protein	55	Over-dominance	Over-dominance
gene-BC332_14264	MDP0000315270	GRAS family protein	Ankyrin repeat-containing protein	55	Over-dominance	Over-dominance
gene-BC332_26692	CCG008396.1	GRAS family protein	Alpha-L-arabinofuranosidase 1	55	Over-dominance	Over-dominance
gene-BC332_28050	NNU_016725-RA	GRAS family protein	hypothetical protein	55	Over-dominance	High-parental dominance
gene-BC332_30473	Csa11g014890.1	GRAS family protein	Ammonium transporter 1 member 2	55	Over-dominance	High-parental dominance
gene-BC332_20661	TRIUR3_17264-P1	GRAS family protein	Cinnamate beta-D-glucosyltransferase	55	Over-dominance	High-parental dominance
gene-BC332_02675	MDP0000232659	GRAS family protein	Histone-lysine N-methyltransferase EZ2	55	Over-dominance	High-parental dominance
gene-BC332_03662	Lus10040166	GRAS family protein	putate calcium-transporting ATPase 7%2C plasma membrane-type	55	Over-dominance	High-parental dominance
gene-BC332_05323	CA02g22940	GRAS family protein	Scarecrow-like protein 15	55	Over-dominance	High-parental dominance
gene-BC332_05907	NNU_016725-RA	GRAS family protein	WAT1-related protein	55	Over-dominance	High-parental dominance
gene-BC332_06590	Csa11g014890.1	GRAS family protein	Ammonium transporter 1 member 1	55	Over-dominance	High-parental dominance
gene-BC332_11101	Lus10040166	GRAS family protein	Plasma membrane ATPase 1	55	Over-dominance	High-parental dominance
gene-BC332_16289	KZV34808.1	GRAS family protein	putate plastidic glucose transporter 2	55	Over-dominance	High-parental dominance
gene-BC332_21632	Lus10040166	GRAS family protein	Calcium-transporting ATPase 2%2C endoplasmic reticulum-type	55	Over-dominance	High-parental dominance
gene-BC332_21764	MDP0000464809	GRAS family protein	hypothetical protein	55	Over-dominance	High-parental dominance
gene-BC332_23345	CA09g05170	GRAS family protein	Scarecrow-like protein 9	55	Over-dominance	High-parental dominance
gene-BC332_24333	Cotton_A_17926_BGI-A2_v1.0	GRAS family protein	hypothetical protein	55	Over-dominance	High-parental dominance
gene-BC332_15755	Cotton_A_17926_BGI-A2_v1.0	GRAS family protein	(-)-germacrene D synthase	55	Over-dominance	Additivity
gene-BC332_33833	Cotton_A_17926_BGI-A2_v1.0	GRAS family protein	Vetispiradiene synthase 2	55	Low-parental dominance	Low-parental dominance
gene-BC332_29506	Peaxi162Scf00646g00004.1	GRAS family protein	hypothetical protein	55	Low-parental dominance	High-parental dominance
novel.4612	Sme2.5_00121.1_g00003.1	GRAS family protein	- && - && -	55	Low-parental dominance	High-parental dominance
gene-BC332_29512	Peaxi162Scf00646g00004.1	GRAS family protein	hypothetical protein	55	Low-parental dominance	Additivity
gene-BC332_29583	Peaxi162Scf00646g00004.1	GRAS family protein	hypothetical protein	55	Low-parental dominance	Additivity
novel.1903	TRIUR3_17264-P1	GRAS family protein	- && F8WKW1.1 RecName: Full=7-deoxyloganetin glucosyltransferase; AltName: Full=Genipin glucosyltransferase; AltName: Full=UDP-glucose glucosyltransferase 2; Short=GjUGT2; AltName: Full=UDP-glycosyltransferase 85A24 && PF00201:UDP-glucoronosyl and UDP-glu	55	Low-parental dominance	Additivity
gene-BC332_29442	Peaxi162Scf00646g00004.1	GRAS family protein	hypothetical protein	55	High-parental dominance	Low-parental dominance
gene-BC332_06084	CA02g29990	GRAS family protein	Scarecrow-like protein 9	55	High-parental dominance	High-parental dominance
gene-BC332_25923	CA10g04850	GRAS family protein	Scarecrow-like protein 9	55	High-parental dominance	High-parental dominance
novel.143	DCAR_002090	GRAS family protein	- && Q9M8Y0.1 RecName: Full=Probable UDP-N-acetylglucosamine--peptide N-acetylglucosaminyltransferase SEC; AltName: Full=Protein SECRET AGENT && PF13844:Glycosyl transferase family 41	55	High-parental dominance	High-parental dominance
novel.489	DCAR_002090	GRAS family protein	- && Q9M8Y0.1 RecName: Full=Probable UDP-N-acetylglucosamine--peptide N-acetylglucosaminyltransferase SEC; AltName: Full=Protein SECRET AGENT && PF13844:Glycosyl transferase family 41	55	High-parental dominance	High-parental dominance
novel.7250	Rsa1.0_01791.1_g00001.1	GRAS family protein	- && - && PF00665:Integrase core domain|PF13976:GAG-pre-integrase domain	55	High-parental dominance	High-parental dominance
gene-BC332_19446	Peaxi162Scf00646g00004.1	GRAS family protein	hypothetical protein	55	Additivity	Low-parental dominance
novel.7415	TRIUR3_17264-P1	GRAS family protein	- && F8WKW0.1 RecName: Full=Crocetin glucosyltransferase, chloroplastic; AltName: Full=UDP-glucose glucosyltransferase 1; Short=GjUGT1; AltName: Full=UDP-glycosyltransferase 75L6; Flags: Precursor && PF00201:UDP-glucoronosyl and UDP-glucosyl transferase	55	Additivity	High-parental dominance
gene-BC332_01928	FANhyb_rscf00000149.1.g00006.1	GRAS family protein	hypothetical protein	55	Additivity	Additivity
novel.1100	Gh_D08G0309	GRAS family protein	- && - && -	55	Additivity	Additivity
novel.2558	Potri.016G025800.1	GRAS family protein	- && Q6AVI0.1 RecName: Full=Zinc finger BED domain-containing protein RICESLEEPER 2; AltName: Full=Transposase-like protein RICESLEEPER 2 && PF05699:hAT family C-terminal dimerisation region|PF14372:Domain of unknown function (DUF4413)	55	Additivity	Additivity
novel.3684	Cotton_A_16824_BGI-A2_v1.0	GRAS family protein	- && - && PF12767:Transcriptional regulator of RNA polII, SAGA, subunit|PF01386:Ribosomal L25p family	55	Additivity	Additivity
novel.3685	Thecc1EG019956t1	GRAS family protein	- && P08770.2 RecName: Full=Putate AC transposase; AltName: Full=ORFA && PF05699:hAT family C-terminal dimerisation region	55	Additivity	Additivity
novel.552	MDP0000258655	GRAS family protein	- && - && -	55	Additivity	Additivity
gene-BC332_02409	Bathy05g04020	G2-like family protein	Protein CHROMATIN REMODELING 24	46	Under-dominance	Under-dominance
gene-BC332_05344	Bathy05g04020	G2-like family protein	ATP-dependent DNA helicase DDM1	46	Under-dominance	Under-dominance
gene-BC332_12149	DCAR_023529	G2-like family protein	Cyclin-dependent kinase B2-1	46	Under-dominance	Under-dominance
gene-BC332_25703	DCAR_023529	G2-like family protein	Cyclin-dependent kinase B1-1	46	Under-dominance	Under-dominance
gene-BC332_27554	405683	G2-like family protein	Argininosuccinate synthase	46	Under-dominance	Under-dominance
novel.1537	Zjn_sc00023.1.g02100.1.am.mk	G2-like family protein	- && Q9SZA4.1 RecName: Full=Cell dision cycle 20.1, cofactor of APC complex; Short=AtCDC20.1 && -	46	Under-dominance	Under-dominance
gene-BC332_03317	Bathy05g04020	G2-like family protein	ATP-dependent DNA helicase DDM1	46	Under-dominance	Low-parental dominance
gene-BC332_15244	OPUNC09G03970.2	G2-like family protein	hypothetical protein	46	Under-dominance	Low-parental dominance
gene-BC332_27950	Achn036321	G2-like family protein	hypothetical protein	46	Under-dominance	Low-parental dominance
gene-BC332_32351	Sme2.5_00194.1_g00016.1	G2-like family protein	putate dimethyladenosine transferase	46	Under-dominance	Low-parental dominance
novel.2562	MDP0000121180	G2-like family protein	- && Q9M1S3.1 RecName: Full=Probable RNA-binding protein ARP1; AltName: Full=ABA-regulated RNA-binding protein 1 && PF00076:RNA recognition motif. (a.k.a. RRM, RBD, or RNP domain)	46	Under-dominance	Low-parental dominance
gene-BC332_11229	Medtr6g005650.1	G2-like family protein	hypothetical protein	46	Under-dominance	High-parental dominance
gene-BC332_16540	OPUNC06G18860.1	G2-like family protein	hypothetical protein	46	Under-dominance	High-parental dominance
gene-BC332_22367	CA08g17660	G2-like family protein	hypothetical protein	46	Under-dominance	High-parental dominance
gene-BC332_27315	CA10g17970	G2-like family protein	Protein PHR1-LIKE 1	46	Under-dominance	High-parental dominance
novel.1204	CA10g20900	G2-like family protein	- && - && -	46	Under-dominance	High-parental dominance
gene-BC332_25010	FANhyb_rscf00000398.1.g00005.1	G2-like family protein	Peroxisomal (S)-2-hydroxy-acid oxidase GLO1	46	Under-dominance	Additivity
gene-BC332_09620	Araip.BVG6R	G2-like family protein	hypothetical protein	46	Over-dominance	Over-dominance
gene-BC332_14381	CA00g91730	G2-like family protein	Protein PHR1-LIKE 1	46	Over-dominance	Over-dominance
gene-BC332_03192	OPUNC06G18860.1	G2-like family protein	hypothetical protein	46	Over-dominance	Low-parental dominance
gene-BC332_06463	CA03g01170	G2-like family protein	Myb family transcription factor APL	46	Over-dominance	Low-parental dominance
gene-BC332_17377	Sopen09g001330.1	G2-like family protein	Protein NRT1/ PTR FAMILY 8.3	46	Over-dominance	High-parental dominance
gene-BC332_20583	Gh_A02G0666	G2-like family protein	Abscisic acid 8'-hydroxylase 1	46	Over-dominance	High-parental dominance
gene-BC332_26464	CA10g16780	G2-like family protein	Myb family transcription factor APL	46	Over-dominance	High-parental dominance
gene-BC332_31131	Sopen09g001330.1	G2-like family protein	hypothetical protein	46	Over-dominance	High-parental dominance
novel.1168	Lus10021035	G2-like family protein	- && Q76LC6.1 RecName: Full=RNA-binding protein 24; AltName: Full=RNA-binding motif protein 24; AltName: Full=RNA-binding protein SEB-4 && PF00076:RNA recognition motif. (a.k.a. RRM, RBD, or RNP domain)	46	Over-dominance	High-parental dominance
novel.2194	CA10g20900	G2-like family protein	- && Q6AYL5.1 RecName: Full=Splicing factor 3B subunit 4 >Q8QZY9.1 RecName: Full=Splicing factor 3B subunit 4 && -	46	Over-dominance	Additivity
gene-BC332_04524	Achn036321	G2-like family protein	hypothetical protein	46	Low-parental dominance	Low-parental dominance
gene-BC332_10820	Do005544.1	G2-like family protein	Pumilio -like protein 5	46	Low-parental dominance	High-parental dominance
gene-BC332_29731	XP_011395797.1	G2-like family protein	Acyl-[acyl-carrier-protein] desaturase%2C chloroplastic	46	Low-parental dominance	High-parental dominance
gene-BC332_29847	KN538778.1_FGP010	G2-like family protein	Pumilio -like protein 2	46	Low-parental dominance	High-parental dominance
novel.2077	CA10g20900	G2-like family protein	- && - && -	46	Low-parental dominance	High-parental dominance
novel.2750	CA10g20900	G2-like family protein	- && - && -	46	High-parental dominance	Over-dominance
gene-BC332_10047	Gh_A02G0666	G2-like family protein	Abscisic acid 8'-hydroxylase 3	46	High-parental dominance	High-parental dominance
gene-BC332_20011	OPUNC06G18860.1	G2-like family protein	putate ADP-ribosylation factor GTPase-actating protein AGD5	46	High-parental dominance	High-parental dominance
gene-BC332_23874	Do005544.1	G2-like family protein	hypothetical protein	46	High-parental dominance	High-parental dominance
novel.2044	mrna15055.1-v1.0-hybrid	G2-like family protein	- && - && -	46	High-parental dominance	High-parental dominance
novel.356	CA10g20900	G2-like family protein	- && - && -	46	High-parental dominance	High-parental dominance
novel.5586	CA10g20900	G2-like family protein	- && Q1PF50.2 RecName: Full=Probable serine protease EDA2; AltName: Full=Protein EMBRYO SAC DEVELOPMENT ARREST 2; Flags: Precursor && PF08541:3-Oxoacyl-[acyl-carrier-protein (ACP)] synthase III C terminal|PF05577:Serine carboxypeptidase S28	46	High-parental dominance	High-parental dominance
gene-BC332_26317	Sopen02g025440.1	G2-like family protein	hypothetical protein	46	High-parental dominance	Additivity
novel.2065	CA10g20900	G2-like family protein	- && P0CR39.1 RecName: Full=Protein transport protein SEC23 >P0CR38.1 RecName: Full=Protein transport protein SEC23 && PF04811:Sec23/Sec24 trunk domain|PF04810:Sec23/Sec24 zinc finger	46	High-parental dominance	Additivity
gene-BC332_06693	Sopen09g001330.1	G2-like family protein	Protein NRT1/ PTR FAMILY 5.2	46	High-parental dominance	Additivity
novel.4718	Sopen11g010100.1	G2-like family protein	- && - && -	46	High-parental dominance	Additivity
gene-BC332_19076	KHN22286.1	G2-like family protein	hypothetical protein	46	Additivity	High-parental dominance
novel.614	Sopen09g001330.1	G2-like family protein	- && Q9LFB8.1 RecName: Full=Protein NRT1/ PTR FAMILY 8.2; Short=AtNPF8.2; AltName: Full=Peptide transporter PTR5 && PF00854:POT family	46	Additivity	High-parental dominance
gene-BC332_11309	Rsa1.0_03766.1_g00001.1	G2-like family protein	Protein STRUBBELIG-RECEPTOR FAMILY 6	46	Additivity	Additivity
gene-BC332_02761	Sme2.5_00572.1_g00001.1	HD-ZIP family protein	hypothetical protein	46	Under-dominance	Under-dominance
gene-BC332_31184	Zpz_sc03896.1.g00010.1.sm.mk	HD-ZIP family protein	hypothetical protein	46	Under-dominance	Under-dominance
gene-BC332_00550	Sme2.5_01105.1_g00008.1	HD-ZIP family protein	Homeobox-leucine zipper protein HAT2	46	Under-dominance	Over-dominance
gene-BC332_17735	GSMUA_Achr7P08840_001	HD-ZIP family protein	putate pectate lyase 18	46	Under-dominance	Over-dominance
gene-BC332_28187	GSMUA_Achr7P08840_001	HD-ZIP family protein	putate pectate lyase 22	46	Under-dominance	Over-dominance
novel.5703	Sopen10g002990.1	HD-ZIP family protein	- && Q9LUH3.1 RecName: Full=Protein DETOXIFICATION 18; Short=AtDTX18; AltName: Full=Multidrug and toxic compound extrusion protein 18; Short=MATE protein 18; AltName: Full=Protein LIKE ALF5 && PF01554:MatE	46	Under-dominance	Over-dominance
gene-BC332_07618	GSMUA_Achr7P08840_001	HD-ZIP family protein	putate pectate lyase 12	46	Under-dominance	Low-parental dominance
gene-BC332_17347	CCG006719.1	HD-ZIP family protein	Proliferating cell nuclear antigen	46	Under-dominance	Low-parental dominance
gene-BC332_16667	GSMUA_Achr7P08840_001	HD-ZIP family protein	putate pectate lyase 7	46	Under-dominance	High-parental dominance
novel.5706	Sopen10g002990.1	HD-ZIP family protein	- && Q9LUH3.1 RecName: Full=Protein DETOXIFICATION 18; Short=AtDTX18; AltName: Full=Multidrug and toxic compound extrusion protein 18; Short=MATE protein 18; AltName: Full=Protein LIKE ALF5 && PF01554:MatE	46	Under-dominance	High-parental dominance
gene-BC332_19644	MDP0000598064	HD-ZIP family protein	hypothetical protein	46	Under-dominance	Additivity
gene-BC332_27872	PGSC0003DMP400030812	HD-ZIP family protein	Homeobox-leucine zipper protein HOX16	46	Over-dominance	Over-dominance
gene-BC332_05047	Do000506.1	HD-ZIP family protein	hypothetical protein	46	Over-dominance	Over-dominance
gene-BC332_05614	CA02g24650	HD-ZIP family protein	Homeobox-leucine zipper protein HOX27	46	Over-dominance	Over-dominance
gene-BC332_08335	Do000506.1	HD-ZIP family protein	hypothetical protein	46	Over-dominance	Over-dominance
gene-BC332_10951	Achn143971	HD-ZIP family protein	Sucrose transport protein SUC1	46	Over-dominance	Over-dominance
gene-BC332_22996	mrna28322.1-v1.0-hybrid	HD-ZIP family protein	hypothetical protein	46	Over-dominance	Over-dominance
gene-BC332_23341	mrna28322.1-v1.0-hybrid	HD-ZIP family protein	Protein kinase APK1B%2C chloroplastic	46	Over-dominance	Over-dominance
gene-BC332_27203	Do000506.1	HD-ZIP family protein	putate receptor-like protein kinase	46	Over-dominance	Over-dominance
novel.2988	Sopen10g002990.1	HD-ZIP family protein	- && Q9C994.1 RecName: Full=Protein DETOXIFICATION 14; Short=AtDTX14; AltName: Full=Multidrug and toxic compound extrusion protein 14; Short=MATE protein 14 && PF01554:MatE	46	Over-dominance	Low-parental dominance
gene-BC332_06437	BGIOSGA000239-PA	HD-ZIP family protein	putate sucrose-phosphate synthase 1	46	Over-dominance	High-parental dominance
gene-BC332_21621	CA08g08650	HD-ZIP family protein	Homeobox-leucine zipper protein HOX6	46	Over-dominance	High-parental dominance
gene-BC332_27206	Do000506.1	HD-ZIP family protein	Glycerophosphodiester phosphodiesterase protein kinase domain-containing GDPDL2	46	Over-dominance	High-parental dominance
gene-BC332_27207	Do000506.1	HD-ZIP family protein	putate receptor-like protein kinase	46	Over-dominance	High-parental dominance
gene-BC332_08652	Sme2.5_02903.1_g00007.1	HD-ZIP family protein	Homeobox-leucine zipper protein HOX6	46	Over-dominance	High-parental dominance
gene-BC332_20297	Sme2.5_05296.1_g00004.1	HD-ZIP family protein	hypothetical protein	46	Over-dominance	High-parental dominance
gene-BC332_27212	Do000506.1	HD-ZIP family protein	putate receptor-like protein kinase	46	Over-dominance	High-parental dominance
novel.5852	evm.model.supercontig_109.22	HD-ZIP family protein	- && Q9ZU11.1 RecName: Full=Homeobox-leucine zipper protein ATHB-15; AltName: Full=HD-ZIP protein ATHB-15; AltName: Full=Homeodomain transcription factor ATHB-15; AltName: Full=Protein CORONA; AltName: Full=Protein INCURVATA 4 && -	46	Over-dominance	High-parental dominance
gene-BC332_27245	Do000506.1	HD-ZIP family protein	putate receptor-like protein kinase	46	Over-dominance	Additivity
novel.6316	Sopen10g002990.1	HD-ZIP family protein	- && Q8L731.1 RecName: Full=Protein DETOXIFICATION 12; Short=AtDTX12; AltName: Full=Multidrug and toxic compound extrusion protein 12; Short=MATE protein 12 && PF01554:MatE	46	Low-parental dominance	High-parental dominance
gene-BC332_32668	Sme2.5_05296.1_g00004.1	HD-ZIP family protein	hypothetical protein	46	Low-parental dominance	Additivity
gene-BC332_05896	Vun008257	HD-ZIP family protein	hypothetical protein	46	High-parental dominance	Over-dominance
gene-BC332_05897	CA02g29480	HD-ZIP family protein	Homeobox-leucine zipper protein HAT5	46	High-parental dominance	High-parental dominance
gene-BC332_15976	PK03054.1	HD-ZIP family protein	hypothetical protein	46	High-parental dominance	High-parental dominance
gene-BC332_27209	Do000506.1	HD-ZIP family protein	putate receptor-like protein kinase	46	High-parental dominance	High-parental dominance
novel.7530	Sopen09g021360.1	HD-ZIP family protein	- && Q7LHG5.2 RecName: Full=Transposon Ty3-I Gag-Pol polyprotein; AltName: Full=Gag3-Pol3; AltName: Full=Transposon Ty3-2 TYA-TYB polyprotein; Contains: RecName: Full=Capsid protein; Short=CA; AltName: Full=p24; Contains: RecName: Full=Spacer peptide p3;	46	High-parental dominance	High-parental dominance
novel.6327	PK03054.1	HD-ZIP family protein	- && P04146.3 RecName: Full=Copia protein; AltName: Full=Gag-int-pol protein; Contains: RecName: Full=Copia VLP protein; Contains: RecName: Full=Copia protease && PF00665:Integrase core domain|PF13976:GAG-pre-integrase domain|PF07727:Reverse transcriptase	46	High-parental dominance	Additivity
novel.6465	Sopen09g021360.1	HD-ZIP family protein	- && P10401.1 RecName: Full=Retrovirus-related Pol polyprotein from transposon gypsy; Includes: RecName: Full=Reverse transcriptase; Includes: RecName: Full=Endonuclease && -	46	High-parental dominance	Additivity
gene-BC332_19493	Do000506.1	HD-ZIP family protein	G-type lectin S-receptor-like serine/threonine-protein kinase SD2-5	46	High-parental dominance	Additivity
gene-BC332_24683	Sme2.5_05296.1_g00004.1	HD-ZIP family protein	hypothetical protein	46	Additivity	High-parental dominance
gene-BC332_24689	Sme2.5_05296.1_g00004.1	HD-ZIP family protein	hypothetical protein	46	Additivity	High-parental dominance
gene-BC332_24963	SapurV1A.0722s0230.1.p	HD-ZIP family protein	hypothetical protein	46	Additivity	High-parental dominance
gene-BC332_34501	Do000506.1	HD-ZIP family protein	putate receptor-like protein kinase	46	Additivity	High-parental dominance
novel.2382	PK03054.1	HD-ZIP family protein	- && - && PF13855:Leucine rich repeat|PF00665:Integrase core domain|PF13976:GAG-pre-integrase domain	46	Additivity	High-parental dominance
gene-BC332_33709	PH01000841G0210	HD-ZIP family protein	Wound-induced proteinase inhibitor 2	46	Additivity	Additivity
novel.4138	PK03054.1	HD-ZIP family protein	- && P10978.1 RecName: Full=Retrovirus-related Pol polyprotein from transposon TNT 1-94; Includes: RecName: Full=Protease; Includes: RecName: Full=Reverse transcriptase; Includes: RecName: Full=Endonuclease && PF13976:GAG-pre-integrase domain|PF00098:Zinc	46	Additivity	Additivity
gene-BC332_07995	KZV23864.1	LBD family protein	65-kDa microtubule-associated protein 3	46	Under-dominance	Under-dominance
gene-BC332_22649	FANhyb_rscf00001203.1.g00002.1	LBD family protein	Cellulose synthase-like protein D4	46	Under-dominance	Under-dominance
novel.7305	MDP0000250177	LBD family protein	- && O22897.1 RecName: Full=DUF724 domain-containing protein 6; Short=AtDUF6 && -	46	Under-dominance	Under-dominance
gene-BC332_17087	CA06g23650	LBD family protein	LOB domain-containing protein 1	46	Under-dominance	Over-dominance
gene-BC332_26901	FANhyb_rscf00001203.1.g00002.1	LBD family protein	Cellulose synthase A catalytic subunit 2 [UDP-forming]	46	Under-dominance	Over-dominance
gene-BC332_33913	CA08g16890	LBD family protein	LOB domain-containing protein 38	46	Under-dominance	Over-dominance
gene-BC332_11905	678378151	LBD family protein	hypothetical protein	46	Under-dominance	Low-parental dominance
gene-BC332_21689	KZV23864.1	LBD family protein	65-kDa microtubule-associated protein 5	46	Under-dominance	Low-parental dominance
gene-BC332_29085	KZV46390.1	LBD family protein	Elongation factor 1-alpha	46	Under-dominance	Low-parental dominance
gene-BC332_33233	Aco005756.1	LBD family protein	WD-40 repeat-containing protein MSI1	46	Under-dominance	Low-parental dominance
gene-BC332_11858	CA04g17930	LBD family protein	LOB domain-containing protein 37	46	Under-dominance	High-parental dominance
gene-BC332_31550	Peinf101Scf01921g00008.1	LBD family protein	putate protein phosphatase 2C 40	46	Under-dominance	High-parental dominance
gene-BC332_05835	Jcr4S02988.10	LBD family protein	hypothetical protein	46	Over-dominance	Over-dominance
gene-BC332_11523	Aradu.863B0	LBD family protein	Serine/threonine-protein kinase SAPK2	46	Over-dominance	Over-dominance
gene-BC332_12032	Araip.5AZ2K	LBD family protein	putate disease resistance protein	46	Over-dominance	Over-dominance
gene-BC332_15222	GSMUA_Achr5P10740_001	LBD family protein	Inacte receptor-like serine/threonine-protein kinase	46	Over-dominance	Over-dominance
gene-BC332_27541	Jcr4S02988.10	LBD family protein	Ninja-family protein AFP3	46	Over-dominance	Over-dominance
gene-BC332_29153	Sme2.5_14308.1_g00001.1	LBD family protein	hypothetical protein	46	Over-dominance	Over-dominance
gene-BC332_00092	Jcr4S06019.20	LBD family protein	hypothetical protein	46	Over-dominance	Low-parental dominance
gene-BC332_04412	FANhyb_rscf00001203.1.g00002.1	LBD family protein	hypothetical protein	46	Over-dominance	Low-parental dominance
novel.2843	Rsa1.0_02878.1_g00005.1	LBD family protein	- && P10978.1 RecName: Full=Retrovirus-related Pol polyprotein from transposon TNT 1-94; Includes: RecName: Full=Protease; Includes: RecName: Full=Reverse transcriptase; Includes: RecName: Full=Endonuclease && PF07727:Reverse transcriptase (RNA-dependent	46	Over-dominance	Low-parental dominance
novel.782	Sopen05g028040.1	LBD family protein	- && P10978.1 RecName: Full=Retrovirus-related Pol polyprotein from transposon TNT 1-94; Includes: RecName: Full=Protease; Includes: RecName: Full=Reverse transcriptase; Includes: RecName: Full=Endonuclease && PF07727:Reverse transcriptase (RNA-dependent	46	Over-dominance	Low-parental dominance
gene-BC332_13190	Jcr4S02988.10	LBD family protein	Ninja-family protein AFP3	46	Over-dominance	High-parental dominance
gene-BC332_01952	Rsa1.0_04342.1_g00002.1	LBD family protein	hypothetical protein	46	Over-dominance	High-parental dominance
gene-BC332_08771	Rsa1.0_00832.1_g00012.1	LBD family protein	hypothetical protein	46	Over-dominance	High-parental dominance
gene-BC332_29164	Sme2.5_14308.1_g00001.1	LBD family protein	hypothetical protein	46	Over-dominance	High-parental dominance
gene-BC332_00086	Jcr4S06273.30	LBD family protein	hypothetical protein	46	Over-dominance	Additivity
gene-BC332_06991	676751308	LBD family protein	Beta-galactosidase 15	46	Low-parental dominance	High-parental dominance
novel.2273	Rsa1.0_04342.1_g00002.1	LBD family protein	- && Q9FZ95.1 RecName: Full=Purine permease 3; Short=AtPUP3 && -	46	Low-parental dominance	High-parental dominance
gene-BC332_07432	Achn212121	LBD family protein	60S ribosomal protein L23	46	Low-parental dominance	Additivity
gene-BC332_16744	MDP0000250177	LBD family protein	hypothetical protein	46	High-parental dominance	Low-parental dominance
gene-BC332_05710	MDP0000281804	LBD family protein	hypothetical protein	46	High-parental dominance	High-parental dominance
gene-BC332_05711	MDP0000281804	LBD family protein	hypothetical protein	46	High-parental dominance	High-parental dominance
gene-BC332_32771	PSME_00043148-RA	LBD family protein	hypothetical protein	46	High-parental dominance	High-parental dominance
novel.2454	Itr_sc000159.1_g00052.1	LBD family protein	- && B8BKI8.1 RecName: Full=DNA replication licensing factor MCM2; AltName: Full=Minichromosome maintenance protein 2 && PF00493:MCM2/3/5 family|PF13976:GAG-pre-integrase domain	46	High-parental dominance	High-parental dominance
novel.4791	Rsa1.0_02878.1_g00005.1	LBD family protein	- && P10978.1 RecName: Full=Retrovirus-related Pol polyprotein from transposon TNT 1-94; Includes: RecName: Full=Protease; Includes: RecName: Full=Reverse transcriptase; Includes: RecName: Full=Endonuclease && PF07727:Reverse transcriptase (RNA-dependent	46	High-parental dominance	High-parental dominance
novel.5046	Rsa1.0_04342.1_g00002.1	LBD family protein	- && Q41249.1 RecName: Full=Protochlorophyllide reductase, chloroplastic; Short=PCR; AltName: Full=NADPH-protochlorophyllide oxidoreductase; Short=POR; Flags: Precursor && -	46	High-parental dominance	High-parental dominance
novel.5311	Rsa1.0_04342.1_g00002.1	LBD family protein	- && P14381.1 RecName: Full=Transposon TX1 uncharacterized 149 kDa protein; AltName: Full=ORF 2 && -	46	High-parental dominance	High-parental dominance
novel.5581	Sopen05g028040.1	LBD family protein	- && - && PF13976:GAG-pre-integrase domain|PF07727:Reverse transcriptase (RNA-dependent DNA polymerase)	46	High-parental dominance	High-parental dominance
gene-BC332_00084	Jcr4S06273.30	LBD family protein	hypothetical protein	46	High-parental dominance	Additivity
novel.664	Rsa1.0_04342.1_g00002.1	LBD family protein	- && - && -	46	Additivity	High-parental dominance
novel.7380	Rsa1.0_04342.1_g00002.1	LBD family protein	- && - && PF04434:SWIM zinc finger	46	Additivity	High-parental dominance
gene-BC332_10235	GSMUA_Achr5P10740_001	LBD family protein	hypothetical protein	46	Additivity	Additivity
gene-BC332_21251	Aradu.863B0	LBD family protein	hypothetical protein	46	Additivity	Additivity
novel.3569	KZV23864.1	LBD family protein	- && Q9FHM4.1 RecName: Full=65-kDa microtubule-associated protein 3; Short=AtMAP65-3; AltName: Full=Protein PLEIADE && -	46	Additivity	Additivity
novel.5536	Rsa1.0_02878.1_g00005.1	LBD family protein	- && P10978.1 RecName: Full=Retrovirus-related Pol polyprotein from transposon TNT 1-94; Includes: RecName: Full=Protease; Includes: RecName: Full=Reverse transcriptase; Includes: RecName: Full=Endonuclease && PF07727:Reverse transcriptase (RNA-dependent	46	Additivity	Additivity
novel.7651	Rsa1.0_04342.1_g00002.1	LBD family protein	- && Q03274.1 RecName: Full=Retrovirus-related Pol polyprotein from type-1 retrotransposable element R2; AltName: Full=Retrovirus-related Pol polyprotein from type I retrotransposable element R2; Includes: RecName: Full=Reverse transcriptase; Includes: Re	46	Additivity	Additivity
gene-BC332_09286	Do027717.1	Trihel family protein	Tubby-like protein 8	44	Under-dominance	Under-dominance
gene-BC332_18567	PSME_00021188-RA	Trihel family protein	DNA repair protein RAD51 -like protein	44	Under-dominance	Under-dominance
gene-BC332_09289	Aco017242.1	Trihel family protein	hypothetical protein	44	Under-dominance	Over-dominance
gene-BC332_30929	Aco017242.1	Trihel family protein	hypothetical protein	44	Under-dominance	Over-dominance
gene-BC332_31153	MDP0000275412	Trihel family protein	hypothetical protein	44	Under-dominance	Over-dominance
gene-BC332_12969	Aco017242.1	Trihel family protein	Protein ASPARTIC PROTEASE IN GUARD CELL 2	44	Under-dominance	Low-parental dominance
gene-BC332_19416	CA00g44100	Trihel family protein	hypothetical protein	44	Under-dominance	Low-parental dominance
gene-BC332_21617	SapurV1A.2810s0010.1.p	Trihel family protein	Rho GTPase-actating protein 3	44	Under-dominance	Low-parental dominance
gene-BC332_26185	Achn114091	Trihel family protein	Elongation factor 1-delta 2	44	Under-dominance	Low-parental dominance
gene-BC332_11618	Aco017242.1	Trihel family protein	hypothetical protein	44	Under-dominance	High-parental dominance
gene-BC332_15837	C.cajan_40518	Trihel family protein	hypothetical protein	44	Under-dominance	High-parental dominance
gene-BC332_15997	C.cajan_40518	Trihel family protein	putate lipid-binding protein	44	Under-dominance	High-parental dominance
gene-BC332_24783	C.cajan_40518	Trihel family protein	Repetite proline-rich cell wall protein 2	44	Under-dominance	High-parental dominance
novel.7468	Psi010992	Trihel family protein	- && - && PF05699:hAT family C-terminal dimerisation region	44	Under-dominance	High-parental dominance
gene-BC332_01114	C.cajan_40518	Trihel family protein	14 kDa proline-rich protein DC2.15	44	Under-dominance	Additivity
gene-BC332_02670	Achn114091	Trihel family protein	Elongation factor 1-delta 2	44	Under-dominance	Additivity
gene-BC332_17483	C.cajan_40518	Trihel family protein	pEARLI1-like lipid transfer protein 2	44	Over-dominance	Over-dominance
gene-BC332_32784	Aco017242.1	Trihel family protein	hypothetical protein	44	Over-dominance	Over-dominance
gene-BC332_03670	Aco017242.1	Trihel family protein	Aspartic proteinase PCS1	44	Over-dominance	Low-parental dominance
gene-BC332_15906	Tp57577_TGAC_v2_mRNA3016	Trihel family protein	hypothetical protein	44	Over-dominance	High-parental dominance
gene-BC332_19798	Niben101Scf00646g07008.1	Trihel family protein	Actin-related protein 8	44	Over-dominance	High-parental dominance
gene-BC332_29613	MDP0000321492	Trihel family protein	hypothetical protein	44	Over-dominance	High-parental dominance
gene-BC332_00401	CCG021324.1	Trihel family protein	hypothetical protein	44	Low-parental dominance	Under-dominance
gene-BC332_17488	C.cajan_40518	Trihel family protein	14 kDa proline-rich protein DC2.15	44	Low-parental dominance	Low-parental dominance
gene-BC332_25947	GSMUA_Achr2P03680_001	Trihel family protein	Phosphatidylinositol 4-phosphate 5-kinase 9	44	Low-parental dominance	Low-parental dominance
gene-BC332_03469	420183	Trihel family protein	hypothetical protein	44	Low-parental dominance	High-parental dominance
gene-BC332_07930	C.cajan_40518	Trihel family protein	Lipid transfer protein EARLI 1	44	Low-parental dominance	High-parental dominance
gene-BC332_20412	CCG021324.1	Trihel family protein	hypothetical protein	44	Low-parental dominance	High-parental dominance
gene-BC332_24723	Vang03g11510.1	Trihel family protein	hypothetical protein	44	Low-parental dominance	High-parental dominance
gene-BC332_26356	676765190	Trihel family protein	Threonine dehydratase biosynthetic%2C chloroplastic	44	Low-parental dominance	Additivity
novel.1489	Lus10022454	Trihel family protein	- && Q9M3B4.1 RecName: Full=Protein ROOT INITIATION DEFECTE 3; AltName: Full=Root initiation defecte 3 protein; AltName: Full=WD-40 repeat-containing protein RID3 && -	44	Low-parental dominance	Additivity
gene-BC332_12722	Aco017242.1	Trihel family protein	hypothetical protein	44	High-parental dominance	High-parental dominance
gene-BC332_27210	XP_015897327.1	Trihel family protein	putate receptor-like protein kinase	44	High-parental dominance	High-parental dominance
gene-BC332_33824	Aqcoe2G184300.1.p	Trihel family protein	Kinesin-like protein KIFC1	44	High-parental dominance	High-parental dominance
novel.4133	Vang03g11510.1	Trihel family protein	- && Q8VYZ3.1 RecName: Full=Probable pectinesterase 53; Short=PE 53; AltName: Full=Pectin methylesterase 53; Short=AtPME53; Flags: Precursor && PF01095:Pectinesterase|PF03485:Arginyl tRNA synthetase N terminal domain	44	High-parental dominance	High-parental dominance
gene-BC332_25418	Jcr4S00429.50	Trihel family protein	Phytoene synthase%2C chloroplastic	44	High-parental dominance	Additivity
gene-BC332_26338	Sphfalx0037s0089.1.p	Trihel family protein	hypothetical protein	44	High-parental dominance	Additivity
novel.1554	Jcr4S00429.50	Trihel family protein	- && Q9SI13.1 RecName: Full=Phosphatidylinositol/phosphatidylcholine transfer protein SFH10; AltName: Full=Protein SEC FOURTEEN HOMOLOGS 10; Short=AtSFH10 && -	44	High-parental dominance	Additivity
gene-BC332_22609	Sp_057020_iign.t1	Trihel family protein	hypothetical protein	44	Additivity	Low-parental dominance
gene-BC332_00403	CCG021324.1	Trihel family protein	hypothetical protein	44	Additivity	High-parental dominance
gene-BC332_26249	CCG021324.1	Trihel family protein	hypothetical protein	44	Additivity	Additivity
novel.2372	Sme2.5_06080.1_g00001.1	Trihel family protein	- && - && -	44	Additivity	Additivity
novel.2786	Sp_057020_iign.t2	Trihel family protein	- && P38995.1 RecName: Full=Copper-transporting ATPase; AltName: Full=Cu(2+)-ATPase && PF00122:E1-E2 ATPase	44	Additivity	Additivity
novel.5039	Sme2.5_06080.1_g00001.1	Trihel family protein	- && - && -	44	Additivity	Additivity
gene-BC332_15172	Rsa1.0_00008.1_g00039.1	HSF family protein	Omega-3 fatty acid desaturase%2C chloroplastic	39	Under-dominance	Over-dominance
gene-BC332_06496	DCAR_024331	HSF family protein	hypothetical protein	39	Under-dominance	Low-parental dominance
gene-BC332_21024	CA08g05000	HSF family protein	Heat shock factor protein HSF30	39	Under-dominance	Low-parental dominance
gene-BC332_31333	OB04G29050.1	HSF family protein	hypothetical protein	39	Under-dominance	Low-parental dominance
gene-BC332_32083	Jcr4S11886.30	HSF family protein	Rapid alkalinization factor 23	39	Under-dominance	Low-parental dominance
gene-BC332_32210	Zmw_sc03900.1.g00090.1	HSF family protein	Outer envelope pore protein 24%2C chloroplastic	39	Under-dominance	Low-parental dominance
gene-BC332_09782	678320775	HSF family protein	hypothetical protein	39	Under-dominance	High-parental dominance
gene-BC332_10382	AA57G00161	HSF family protein	Pentatricopeptide repeat-containing protein%2C chloroplastic	39	Under-dominance	High-parental dominance
gene-BC332_19354	CCG019201.1	HSF family protein	Fasciclin-like arabinogalactan protein 9	39	Under-dominance	High-parental dominance
gene-BC332_20565	Neem_24176_f_2	HSF family protein	Pentatricopeptide repeat-containing protein%2C mitochondrial	39	Under-dominance	High-parental dominance
novel.4872	PH01002606G0040	HSF family protein	- && Q9AT54.1 RecName: Full=Scopoletin glucosyltransferase; AltName: Full=Phenylpropanoid:glucosyltransferase 1 && PF00201:UDP-glucoronosyl and UDP-glucosyl transferase	39	Over-dominance	Over-dominance
gene-BC332_03399	RrC14701_p1	HSF family protein	3-hydroxy-3-methylglutaryl-coenzyme A reductase 2	39	Over-dominance	Over-dominance
gene-BC332_09407	Lus10029852	HSF family protein	Protein SAR DEFICIENT 1	39	Over-dominance	Over-dominance
gene-BC332_09408	Lus10029852	HSF family protein	hypothetical protein	39	Over-dominance	Over-dominance
gene-BC332_10178	CA04g01070	HSF family protein	hypothetical protein	39	Over-dominance	Over-dominance
gene-BC332_19469	CA07g15920	HSF family protein	hypothetical protein	39	Over-dominance	Over-dominance
gene-BC332_19883	RrC2480_p5	HSF family protein	ABC transporter C family member 3	39	Over-dominance	Over-dominance
gene-BC332_05681	CA02g11030	HSF family protein	Heat stress transcription factor B-1	39	Over-dominance	Low-parental dominance
gene-BC332_33572	Lus10029852	HSF family protein	Calmodulin-binding protein 60 D	39	Over-dominance	High-parental dominance
gene-BC332_09592	KZV18523.1	HSF family protein	Protein phosphatase 2C 16	39	Over-dominance	High-parental dominance
gene-BC332_17326	KZV18523.1	HSF family protein	putate protein phosphatase 2C 24	39	Over-dominance	High-parental dominance
gene-BC332_28996	Zmw_sc04076.1.g00070.1	HSF family protein	hypothetical protein	39	Over-dominance	High-parental dominance
gene-BC332_04386	CA02g13280	HSF family protein	hypothetical protein	39	Over-dominance	High-parental dominance
gene-BC332_04414	678445611	HSF family protein	hypothetical protein	39	Over-dominance	High-parental dominance
gene-BC332_08074	CA03g16300	HSF family protein	hypothetical protein	39	Over-dominance	High-parental dominance
gene-BC332_09086	Peinf101Scf01099g01019.1	HSF family protein	Pentatricopeptide repeat-containing protein%2C mitochondrial	39	Over-dominance	High-parental dominance
gene-BC332_15453	CA06g08710	HSF family protein	Heat stress transcription factor A-2e	39	Over-dominance	High-parental dominance
gene-BC332_16996	Zmw_sc04076.1.g00070.1	HSF family protein	hypothetical protein	39	Over-dominance	High-parental dominance
gene-BC332_25261	Lus10029852	HSF family protein	Calmodulin-binding protein 60 C	39	Over-dominance	High-parental dominance
gene-BC332_31099	KZV18523.1	HSF family protein	putate protein phosphatase 2C 53	39	Over-dominance	High-parental dominance
gene-BC332_32158	Lus10029852	HSF family protein	hypothetical protein	39	Over-dominance	High-parental dominance
gene-BC332_33567	Lus10029852	HSF family protein	hypothetical protein	39	Over-dominance	High-parental dominance
novel.959	PSME_00042828-RA	HSF family protein	- && - && -	39	Over-dominance	High-parental dominance
gene-BC332_24301	KN539506.1_FGP002	HSF family protein	Transmembrane emp24 domain-containing protein p24beta2	39	Low-parental dominance	High-parental dominance
gene-BC332_33175	CA00g71530	HSF family protein	Heat stress transcription factor C-1	39	Low-parental dominance	High-parental dominance
gene-BC332_15440	FANhyb_rscf00000407.1.g00004.1	HSF family protein	hypothetical protein	39	Low-parental dominance	Additivity
gene-BC332_34254	Csa09g009740.1	HSF family protein	Cytochrome 71A2	39	Low-parental dominance	Additivity
novel.1467	Vradi08g09150.1	HSF family protein	- && Q8RWN0.1 RecName: Full=Ubiquitin-like-specific protease 1C; AltName: Full=Protein OVERLY TOLERANT TO SALT 2 && -	39	High-parental dominance	Additivity
gene-BC332_00574	mrna02408.1-v1.0-hybrid	HSF family protein	Pentatricopeptide repeat-containing protein%2C mitochondrial	39	Additivity	High-parental dominance
gene-BC332_00049	FANhyb_rscf00000233.1.g00002.1	GATA family protein	Luminal-binding protein 5	38	Under-dominance	Under-dominance
gene-BC332_08378	FANhyb_rscf00000233.1.g00002.1	GATA family protein	Luminal-binding protein	38	Under-dominance	Under-dominance
gene-BC332_17317	FANhyb_rscf00000233.1.g00002.1	GATA family protein	Heat shock cognate 70 kDa protein	38	Under-dominance	Under-dominance
gene-BC332_18633	FANhyb_rscf00000233.1.g00002.1	GATA family protein	Heat shock 70 kDa protein 17	38	Under-dominance	Under-dominance
gene-BC332_30685	FANhyb_rscf00000233.1.g00002.1	GATA family protein	Heat shock 70 kDa protein 14	38	Under-dominance	Under-dominance
gene-BC332_01127	Sme2.5_01230.1_g00009.1	GATA family protein	RNA-binding KH domain-containing protein PEPPER	38	Under-dominance	Low-parental dominance
gene-BC332_19196	678437992	GATA family protein	hypothetical protein	38	Under-dominance	Low-parental dominance
gene-BC332_21668	RrC417_p8	GATA family protein	Thioredoxin-like protein CITRX%2C chloroplastic	38	Under-dominance	Low-parental dominance
gene-BC332_30680	evm_27.model.AmTr_v1.0_scaffold00155.59	GATA family protein	40S ribosomal protein S12	38	Under-dominance	Low-parental dominance
gene-BC332_31525	CA12g21330	GATA family protein	GATA transcription factor 23	38	Under-dominance	Low-parental dominance
gene-BC332_33616	evm_27.model.AmTr_v1.0_scaffold00155.59	GATA family protein	40S ribosomal protein S12	38	Under-dominance	Low-parental dominance
gene-BC332_04766	678437992	GATA family protein	hypothetical protein	38	Under-dominance	High-parental dominance
gene-BC332_05526	DCAR_015528	GATA family protein	hypothetical protein	38	Under-dominance	High-parental dominance
gene-BC332_27037	DCAR_015528	GATA family protein	Cytochrome 82A4	38	Over-dominance	Over-dominance
gene-BC332_30098	DCAR_015528	GATA family protein	hypothetical protein	38	Over-dominance	Over-dominance
gene-BC332_33052	DCAR_015528	GATA family protein	hypothetical protein	38	Over-dominance	Over-dominance
gene-BC332_03133	CA00g32430	GATA family protein	GATA transcription factor 2	38	Over-dominance	Low-parental dominance
gene-BC332_32460	XP_009760739.1	GATA family protein	hypothetical protein	38	Over-dominance	Low-parental dominance
gene-BC332_12495	DCAR_015528	GATA family protein	hypothetical protein	38	Over-dominance	High-parental dominance
gene-BC332_00656	CA01g06170	GATA family protein	GATA transcription factor 26	38	Over-dominance	High-parental dominance
gene-BC332_25263	Gh_D13G2412	GATA family protein	hypothetical protein	38	Over-dominance	High-parental dominance
gene-BC332_31806	DCAR_015528	GATA family protein	hypothetical protein	38	Over-dominance	High-parental dominance
gene-BC332_31842	PH01000162G1360	GATA family protein	TATA-box-binding protein	38	Over-dominance	High-parental dominance
gene-BC332_31869	DCAR_015528	GATA family protein	hypothetical protein	38	Over-dominance	High-parental dominance
gene-BC332_00689	DCAR_015528	GATA family protein	hypothetical protein	38	Over-dominance	Additivity
gene-BC332_23151	KN538788.1_FGP023	GATA family protein	E3 ubiquitin-protein ligase UPL4	38	Over-dominance	Additivity
gene-BC332_32461	Sopen01g046900.2	GATA family protein	hypothetical protein	38	High-parental dominance	Low-parental dominance
gene-BC332_13057	ONHigh-parental dominanceA06G28780.1	GATA family protein	hypothetical protein	38	High-parental dominance	High-parental dominance
gene-BC332_21247	GRMZM2G396451_P01	GATA family protein	hypothetical protein	38	High-parental dominance	High-parental dominance
gene-BC332_25141	Gh_D13G2412	GATA family protein	hypothetical protein	38	High-parental dominance	High-parental dominance
gene-BC332_31816	DCAR_015528	GATA family protein	hypothetical protein	38	High-parental dominance	High-parental dominance
novel.1506	Achn226221	GATA family protein	- && Q8H1G3.1 RecName: Full=Metal tolerance protein C4; Short=AtMTPc4; AltName: Full=AtMTP7 && -	38	High-parental dominance	High-parental dominance
novel.5183	FANhyb_rscf00000233.1.g00002.1	GATA family protein	- && Q03685.1 RecName: Full=Luminal-binding protein 5; Short=BiP 5; AltName: Full=78 kDa glucose-regulated protein homolog 5; Short=GRP-78-5; Flags: Precursor && -	38	High-parental dominance	High-parental dominance
gene-BC332_26415	GRMZM2G396451_P01	GATA family protein	hypothetical protein	38	High-parental dominance	Additivity
gene-BC332_32028	DCAR_015528	GATA family protein	hypothetical protein	38	Additivity	High-parental dominance
gene-BC332_33134	GSMUA_Achr6P04510_001	GATA family protein	hypothetical protein	38	Additivity	High-parental dominance
gene-BC332_33517	DCAR_015528	GATA family protein	hypothetical protein	38	Additivity	High-parental dominance
gene-BC332_31011	678437992	GATA family protein	hypothetical protein	38	Additivity	Additivity
gene-BC332_09603	Sme2.5_07423.1_g00002.1	TCP family protein	Protein IQ-DOMAIN 31	38	Under-dominance	Under-dominance
gene-BC332_17665	PSME_00049691-RA	TCP family protein	putate histone H2A variant 1	38	Under-dominance	Under-dominance
gene-BC332_32801	Zmw_sc02201.1.g00090.1	TCP family protein	Replication protein A 32 kDa subunit B	38	Under-dominance	Under-dominance
gene-BC332_07917	Itr_sc000485.1_g00004.1	TCP family protein	40S ribosomal protein S13	38	Under-dominance	Low-parental dominance
gene-BC332_09653	Pbr018420.1	TCP family protein	60S ribosomal protein L28-1	38	Under-dominance	Low-parental dominance
gene-BC332_16154	Zmw_sc02201.1.g00090.1	TCP family protein	hypothetical protein	38	Under-dominance	Low-parental dominance
gene-BC332_16353	Pbr018420.1	TCP family protein	60S ribosomal protein L28-1	38	Under-dominance	Low-parental dominance
novel.467	Itr_sc000485.1_g00004.1	TCP family protein	- && P62302.1 RecName: Full=40S ribosomal protein S13 && PF08069:Ribosomal S13/S15 N-terminal domain|PF00312:Ribosomal protein S15	38	Under-dominance	Low-parental dominance
novel.7091	GSMUA_Achr7P25320_001	TCP family protein	- && Q8LFY8.2 RecName: Full=RING-H2 finger protein ATL54; AltName: Full=RING-type E3 ubiquitin transferase ATL54 && PF13639:Ring finger domain	38	Over-dominance	Over-dominance
gene-BC332_16162	NNU_002551-RA	TCP family protein	Omega-amidase%2Cchloroplastic	38	Over-dominance	Low-parental dominance
gene-BC332_32268	Itr_sc004426.1_g00005.1	TCP family protein	UPF0202 protein	38	Over-dominance	Low-parental dominance
novel.5305	Sme2.5_07423.1_g00002.1	TCP family protein	- && Q9SF32.1 RecName: Full=Protein IQ-DOMAIN 1 && -	38	Over-dominance	Low-parental dominance
novel.6391	Sopen12g015990.1	TCP family protein	- && P0CT34.1 RecName: Full=Transposon Tf2-1 polyprotein; AltName: Full=Retrotransposable element Tf2 155 kDa protein >P0CT35.1 RecName: Full=Transposon Tf2-2 polyprotein; AltName: Full=Retrotransposable element Tf2 155 kDa protein >P0CT37.1 RecName: Full	38	Over-dominance	Low-parental dominance
novel.5981	PDK_30s882641g001	TCP family protein	- && - && -	38	Over-dominance	High-parental dominance
gene-BC332_04614	Sme2.5_07423.1_g00002.1	TCP family protein	hypothetical protein	38	Over-dominance	High-parental dominance
gene-BC332_21376	Achn353711	TCP family protein	ACT domain-containing protein ACR5	38	Over-dominance	High-parental dominance
gene-BC332_21890	Aqcoe5G339000.3.p	TCP family protein	hypothetical protein	38	Over-dominance	High-parental dominance
novel.6092	Sopen12g015990.1	TCP family protein	- && P04323.1 RecName: Full=Retrovirus-related Pol polyprotein from transposon 17.6; Includes: RecName: Full=Protease; Includes: RecName: Full=Reverse transcriptase; Includes: RecName: Full=Endonuclease && PF00098:Zinc knuckle	38	Over-dominance	High-parental dominance
gene-BC332_23117	Sopen02g015800.2	TCP family protein	Mitochondrial import inner membrane translocase subunit TIM14-1	38	Low-parental dominance	Low-parental dominance
gene-BC332_26895	GRMZM2G088440_P01	TCP family protein	Chaperone protein dnaJ 6	38	Low-parental dominance	Low-parental dominance
novel.2121	Sopen12g015990.1	TCP family protein	- && - && -	38	High-parental dominance	High-parental dominance
novel.5238	Sopen12g015990.1	TCP family protein	- && P0CT34.1 RecName: Full=Transposon Tf2-1 polyprotein; AltName: Full=Retrotransposable element Tf2 155 kDa protein >P0CT35.1 RecName: Full=Transposon Tf2-2 polyprotein; AltName: Full=Retrotransposable element Tf2 155 kDa protein >P0CT37.1 RecName: Full	38	High-parental dominance	High-parental dominance
gene-BC332_25317	Sopen12g015990.1	TCP family protein	Elongation factor 1-beta 1	38	High-parental dominance	Additivity
gene-BC332_27373	MDP0000304904	TCP family protein	Cullin-2	38	High-parental dominance	Additivity
gene-BC332_34406	MDP0000304904	TCP family protein	putate cullin-like protein 1	38	High-parental dominance	Additivity
novel.270	CA03g33900	TCP family protein	- && F2Y4A3.1 RecName: Full=Sphingosine kinase 2 && -	38	High-parental dominance	Additivity
novel.578	Sopen12g015990.1	TCP family protein	- && - && -	38	High-parental dominance	Additivity
novel.6032	MDP0000304904	TCP family protein	- && Q94AH6.1 RecName: Full=Cullin-1 && PF00888:Cullin family	38	High-parental dominance	Additivity
novel.7372	Sopen12g015990.1	TCP family protein	- && - && -	38	High-parental dominance	Additivity
gene-BC332_23827	Achn093071	TCP family protein	hypothetical protein	38	High-parental dominance	Additivity
gene-BC332_27372	MDP0000304904	TCP family protein	putate cullin-like protein 1	38	Additivity	High-parental dominance
novel.3384	Sopen12g015990.1	TCP family protein	- && - && -	38	Additivity	High-parental dominance
novel.5014	Sopen12g015990.1	TCP family protein	- && - && -	38	Additivity	High-parental dominance
novel.6688	Sopen12g015990.1	TCP family protein	- && - && -	38	Additivity	High-parental dominance
novel.1307	Sopen12g015990.1	TCP family protein	- && P31843.1 RecName: Full=RNA-directed DNA polymerase homolog; AltName: Full=Reverse transcriptase homolog (mitochondrion) [Oenothera berteroana] && -	38	Additivity	Additivity
novel.2753	Sopen12g015990.1	TCP family protein	- && Q7LHG5.2 RecName: Full=Transposon Ty3-I Gag-Pol polyprotein; AltName: Full=Gag3-Pol3; AltName: Full=Transposon Ty3-2 TYA-TYB polyprotein; Contains: RecName: Full=Capsid protein; Short=CA; AltName: Full=p24; Contains: RecName: Full=Spacer peptide p3;	38	Additivity	Additivity
novel.4299	GRMZM2G414114_P01	TCP family protein	- && - && -	38	Additivity	Additivity
novel.4365	Sopen12g015990.1	TCP family protein	- && P0CT42.1 RecName: Full=Transposon Tf2-7 polyprotein; AltName: Full=Retrotransposable element Tf2 155 kDa protein >P0CT43.1 RecName: Full=Transposon Tf2-8 polyprotein; AltName: Full=Retrotransposable element Tf2 155 kDa protein && PF07727:Reverse tran	38	Additivity	Additivity
gene-BC332_08791	WALNUT_00030998-RA	NF-YB family protein	17.9 kDa class II heat shock protein	34	Under-dominance	Under-dominance
gene-BC332_17338	WALNUT_00030998-RA	NF-YB family protein	hypothetical protein	34	Under-dominance	Under-dominance
gene-BC332_22356	WALNUT_00030998-RA	NF-YB family protein	18.5 kDa class I heat shock protein	34	Under-dominance	Under-dominance
gene-BC332_23101	Gh_D11G3286	NF-YB family protein	hypothetical protein	34	Under-dominance	Under-dominance
gene-BC332_31186	Zmw_sc03830.1.g00090.1	NF-YB family protein	hypothetical protein	34	Under-dominance	Under-dominance
gene-BC332_04469	Sme2.5_16129.1_g00001.1	NF-YB family protein	DNA polymerase alpha catalytic subunit	34	Under-dominance	Low-parental dominance
gene-BC332_07830	GSVHigh-parental dominanceT01030085001	NF-YB family protein	Fasciclin-like arabinogalactan protein 1	34	Under-dominance	Low-parental dominance
gene-BC332_12539	Sme2.5_09506.1_g00002.1	NF-YB family protein	Alpha-ketoglutarate-dependent dioxygenase alkB -like protein 2	34	Under-dominance	Low-parental dominance
gene-BC332_12781	Peinf101Scf00001g02003.1	NF-YB family protein	Nuclear transcription factor Y subunit B-8	34	Under-dominance	Low-parental dominance
gene-BC332_15308	LPERR01G31230.1	NF-YB family protein	40S ribosomal protein S23	34	Under-dominance	Low-parental dominance
gene-BC332_17337	WALNUT_00030998-RA	NF-YB family protein	hypothetical protein	34	Under-dominance	Low-parental dominance
gene-BC332_23102	LPERR01G31230.1	NF-YB family protein	40S ribosomal protein S23	34	Under-dominance	Low-parental dominance
gene-BC332_24851	Sme2.5_01006.1_g00006.1	NF-YB family protein	60S ribosomal protein L11	34	Under-dominance	Low-parental dominance
gene-BC332_28916	PGSC0003DMP400045753	NF-YB family protein	hypothetical protein	34	Under-dominance	Low-parental dominance
gene-BC332_18336	Zmw_sc02908.1.g00160.1	NF-YB family protein	hypothetical protein	34	Over-dominance	Over-dominance
gene-BC332_01885	Sme2.5_16129.1_g00001.1	NF-YB family protein	Two-component response regulator-like APRR9	34	Over-dominance	High-parental dominance
gene-BC332_26345	WALNUT_00013191-RA	NF-YB family protein	Zinc finger A20 and AN1 domain-containing stress-associated protein 4	34	Over-dominance	High-parental dominance
gene-BC332_27213	Tp57577_TGAC_v2_mRNA24946	NF-YB family protein	putate receptor-like protein kinase	34	Over-dominance	High-parental dominance
novel.4395	Glyma.03G177700.3.p	NF-YB family protein	- && Q67XJ2.1 RecName: Full=Nuclear transcription factor Y subunit B-10; Short=AtNF-YB-10 && -	34	Over-dominance	High-parental dominance
novel.2878	Sme2.5_01006.1_g00006.1	NF-YB family protein	- && Q9M084.1 RecName: Full=Aspartate--tRNA ligase 2, cytoplasmic; AltName: Full=Aspartyl-tRNA synthetase; Short=AspRS; AltName: Full=Protein IMPAIRED IN BABA-INDUCED DISEASE IMMUNITY 1 && PF00069:Protein kinase domain	34	Over-dominance	Additivity
gene-BC332_28166	Sme2.5_16129.1_g00001.1	NF-YB family protein	REF/SRPP-like protein	34	Over-dominance	Additivity
gene-BC332_17339	WALNUT_00030998-RA	NF-YB family protein	hypothetical protein	34	Low-parental dominance	Under-dominance
gene-BC332_12502	WALNUT_00030998-RA	NF-YB family protein	15.7 kDa heat shock protein%2C peroxisomal	34	Low-parental dominance	Low-parental dominance
novel.4472	Sme2.5_16129.1_g00001.1	NF-YB family protein	- && - && -	34	Low-parental dominance	Low-parental dominance
gene-BC332_03694	OPUNC01G42220.1	NF-YB family protein	Methylesterase 1	34	Low-parental dominance	High-parental dominance
gene-BC332_22385	OPUNC01G42220.1	NF-YB family protein	hypothetical protein	34	High-parental dominance	Low-parental dominance
gene-BC332_22725	WALNUT_00013191-RA	NF-YB family protein	Zinc finger A20 and AN1 domain-containing stress-associated protein 8	34	High-parental dominance	Low-parental dominance
novel.4879	Zmw_sc01983.1.g00170.1	NF-YB family protein	- && Q9SE93.1 RecName: Full=Polyneuridine-aldehyde esterase; AltName: Full=Polyneuridine aldehyde esterase; Flags: Precursor && -	34	High-parental dominance	High-parental dominance
novel.4980	Sme2.5_10366.1_g00001.1	NF-YB family protein	- && - && -	34	High-parental dominance	High-parental dominance
novel.6938	Sme2.5_16129.1_g00001.1	NF-YB family protein	- && - && -	34	High-parental dominance	High-parental dominance
gene-BC332_10605	MDP0000277077	NF-YB family protein	putate methyltransferase PMT11	34	High-parental dominance	High-parental dominance
gene-BC332_17867	Tp57577_TGAC_v2_mRNA24946	NF-YB family protein	hypothetical protein	34	High-parental dominance	High-parental dominance
gene-BC332_29588	Sme2.5_10366.1_g00001.1	NF-YB family protein	hypothetical protein	34	High-parental dominance	High-parental dominance
novel.5178	Sme2.5_16129.1_g00001.1	NF-YB family protein	- && O49500.1 RecName: Full=E3 ubiquitin-protein ligase MBR2; AltName: Full=HAL3-interacting protein 1 homolog; Short=AtHIP1; AltName: Full=MED25-binding RING-H2 protein 2; AltName: Full=RING-H2 finger MBR2 && PF13639:Ring finger domain	34	High-parental dominance	High-parental dominance
gene-BC332_22783	Achn273801	ARF family protein	hypothetical protein	32	Under-dominance	Under-dominance
gene-BC332_29289	LPERR06G05720.4	ARF family protein	10 kDa chaperonin	32	Under-dominance	Under-dominance
novel.4614	Neem_7256_f_2	ARF family protein	- && - && -	32	Under-dominance	Under-dominance
gene-BC332_25889	GSBRNA2T00086041001	ARF family protein	Ribulose bisphosphate carboxylase/oxygenase actase 2%2C chloroplastic	32	Under-dominance	Over-dominance
gene-BC332_00210	Sme2.5_02298.1_g00001.1	ARF family protein	Cellulose synthase-like protein G3	32	Under-dominance	Low-parental dominance
gene-BC332_03199	LPERR06G05720.3	ARF family protein	20 kDa chaperonin%2C chloroplastic	32	Under-dominance	Low-parental dominance
gene-BC332_04323	Achn273801	ARF family protein	3-oxoacyl-[acyl-carrier-protein] synthase I%2C chloroplastic	32	Under-dominance	Low-parental dominance
gene-BC332_12340	Achn024331	ARF family protein	hypothetical protein	32	Under-dominance	Low-parental dominance
gene-BC332_21544	XP_010106165.1	ARF family protein	Non-specific lipid-transfer protein	32	Under-dominance	Low-parental dominance
gene-BC332_26681	MDP0000256621	ARF family protein	hypothetical protein	32	Under-dominance	Low-parental dominance
novel.269	Sme2.5_01901.1_g00007.1	ARF family protein	- && - && -	32	Under-dominance	Low-parental dominance
gene-BC332_16002	XP_012572936.1	ARF family protein	hypothetical protein	32	Under-dominance	High-parental dominance
gene-BC332_26193	GSBRNA2T00086041001	ARF family protein	Ribulose bisphosphate carboxylase/oxygenase actase 2%2C chloroplastic	32	Under-dominance	Additivity
gene-BC332_14610	Thhalv10024662m	ARF family protein	Auxin-induced protein AUX28	32	Over-dominance	Over-dominance
gene-BC332_05893	Araip.8X6BU	ARF family protein	hypothetical protein	32	Over-dominance	Over-dominance
gene-BC332_12372	Achn273801	ARF family protein	hypothetical protein	32	Over-dominance	Over-dominance
gene-BC332_29097	CCG006186.1	ARF family protein	MLO-like protein 6	32	Over-dominance	Over-dominance
novel.1548	678433664	ARF family protein	- && Q94CD1.1 RecName: Full=Omega-hydroxypalmitate O-feruloyl transferase; AltName: Full=Omega-hydroxyacid hydroxycinnamoyltransferase; AltName: Full=Protein ALIPHATIC SUBERIN FERULOYL TRANSFERASE && PF02458:Transferase family	32	Over-dominance	Over-dominance
gene-BC332_14269	CCG006186.1	ARF family protein	hypothetical protein	32	Over-dominance	High-parental dominance
gene-BC332_28092	Araip.8X6BU	ARF family protein	hypothetical protein	32	Over-dominance	High-parental dominance
gene-BC332_05860	Achn116231	ARF family protein	Chaperone protein ClpB3%2C chloroplastic	32	Over-dominance	High-parental dominance
gene-BC332_09511	Csa11g020870.1	ARF family protein	Auxin-response protein IAA17	32	Over-dominance	High-parental dominance
gene-BC332_16407	XP_015895933.1	ARF family protein	Auxin-induced protein IAA6	32	Over-dominance	High-parental dominance
gene-BC332_20340	CA01g34570	ARF family protein	Auxin response factor 7	32	Over-dominance	High-parental dominance
gene-BC332_20904	KN538758.1_FGP044	ARF family protein	Polyadenylate-binding protein-interacting protein 7	32	Over-dominance	High-parental dominance
gene-BC332_05007	Vang01g01860.1	ARF family protein	Pentatricopeptide repeat-containing protein	32	High-parental dominance	Low-parental dominance
gene-BC332_09112	Achn116231	ARF family protein	Chaperone protein ClpB1	32	High-parental dominance	Low-parental dominance
novel.7382	Sme2.5_05295.1_g00002.1	ARF family protein	- && - && -	32	Additivity	Low-parental dominance
gene-BC332_19063	Achn273801	ARF family protein	3-oxoacyl-[acyl-carrier-protein] synthase%2C mitochondrial	32	Additivity	High-parental dominance
gene-BC332_28726	PDK_30s1160841g001	ARF family protein	hypothetical protein	32	Additivity	High-parental dominance
novel.7117	XP_016435858.1	ARF family protein	- && Q0WQK2.1 RecName: Full=Probable protein S-acyltransferase 7; AltName: Full=Probable palmitoyltransferase At3g26935; AltName: Full=Zinc finger DHHC domain-containing protein At3g26935 && -	32	Additivity	High-parental dominance
novel.7545	678433664	ARF family protein	- && Q3ZPN4.1 RecName: Full=Methanol O-anthraniloyltransferase; AltName: Full=Anthraniloyl-CoA:methanol acyltransferase; AltName: Full=Benzyl alcohol O-benzoyltransferase && PF02458:Transferase family	32	Additivity	High-parental dominance
novel.4105	CCG030364.1	NF-YA family protein	- && Q9FNR1.1 RecName: Full=Glycine-rich RNA-binding protein 3, mitochondrial; Short=AtGR-RBP3; AltName: Full=AtRBG3; AltName: Full=Mitochondrial RNA-binding protein 2a; Short=At-mRBP2a; Flags: Precursor && PF00076:RNA recognition motif. (a.k.a. RRM, RBD,	31	Under-dominance	Under-dominance
gene-BC332_01601	Lus10031505	NF-YA family protein	Linoleate 13S-lipoxygenase 2-1%2C chloroplastic	31	Under-dominance	Low-parental dominance
gene-BC332_31897	GSMUA_Achr2P12930_001	NF-YA family protein	Adagio protein 3	31	Under-dominance	Low-parental dominance
novel.163	Lus10031505	NF-YA family protein	- && O24370.1 RecName: Full=Linoleate 13S-lipoxygenase 2-1, chloroplastic; AltName: Full=Lipoxygenase 2-1; Flags: Precursor && PF00305:Lipoxygenase	31	Under-dominance	Low-parental dominance
novel.3149	CCG030364.1	NF-YA family protein	- && Q9SVM8.1 RecName: Full=Glycine-rich RNA-binding protein 2, mitochondrial; Short=AtGR-RBP2; AltName: Full=AtRBG2; AltName: Full=Glycine-rich protein 2; Short=AtGRP2; AltName: Full=Mitochondrial RNA-binding protein 1a; Short=At-mRBP1a; Flags: Precursor	31	Under-dominance	Low-parental dominance
novel.3524	CCG030364.1	NF-YA family protein	- && P19682.1 RecName: Full=28 kDa ribonucleoprotein, chloroplastic; Short=28RNP; Flags: Precursor && PF00076:RNA recognition motif. (a.k.a. RRM, RBD, or RNP domain)	31	Under-dominance	Low-parental dominance
novel.5342	CCG030364.1	NF-YA family protein	- && Q9FNR1.1 RecName: Full=Glycine-rich RNA-binding protein 3, mitochondrial; Short=AtGR-RBP3; AltName: Full=AtRBG3; AltName: Full=Mitochondrial RNA-binding protein 2a; Short=At-mRBP2a; Flags: Precursor && PF00076:RNA recognition motif. (a.k.a. RRM, RBD,	31	Under-dominance	Low-parental dominance
gene-BC332_01606	Lus10031505	NF-YA family protein	Linoleate 13S-lipoxygenase 2-1%2C chloroplastic	31	Under-dominance	High-parental dominance
novel.4930	CCG030364.1	NF-YA family protein	- && Q08935.1 RecName: Full=29 kDa ribonucleoprotein A, chloroplastic; AltName: Full=CP29A; Flags: Precursor && PF00076:RNA recognition motif. (a.k.a. RRM, RBD, or RNP domain)	31	Under-dominance	Additivity
gene-BC332_07052	Lus10031505	NF-YA family protein	hypothetical protein	31	Over-dominance	Over-dominance
gene-BC332_14282	Cotton_A_24712_BGI-A2_v1.0	NF-YA family protein	Protein LIGHT-DEPENDENT SHORT HYPOCOTYLS 5	31	Over-dominance	Over-dominance
novel.2222	Itr_sc000211.1_g00015.1	NF-YA family protein	- && - && -	31	Over-dominance	Low-parental dominance
gene-BC332_02362	PGSC0003DMP400012164	NF-YA family protein	Nuclear transcription factor Y subunit A-9	31	Over-dominance	High-parental dominance
gene-BC332_04174	Sopen02g019020.1	NF-YA family protein	Nuclear transcription factor Y subunit A-7	31	Over-dominance	High-parental dominance
gene-BC332_13252	Achn050401	NF-YA family protein	PHD finger protein ALFIN-LIKE 4	31	Over-dominance	High-parental dominance
gene-BC332_14801	MDP0000311595	NF-YA family protein	hypothetical protein	31	Over-dominance	High-parental dominance
gene-BC332_26798	CA10g20490	NF-YA family protein	Nuclear transcription factor Y subunit A-7	31	Over-dominance	High-parental dominance
gene-BC332_27937	Itr_sc000211.1_g00015.1	NF-YA family protein	hypothetical protein	31	Over-dominance	High-parental dominance
gene-BC332_19549	LPERR03G22840.1	NF-YA family protein	Nuclear/nucleolar GTPase 2	31	Over-dominance	Additivity
gene-BC332_26526	Itr_sc000211.1_g00015.1	NF-YA family protein	hypothetical protein	31	Low-parental dominance	Additivity
novel.7601	CCG030364.1	NF-YA family protein	- && Q9SVM8.1 RecName: Full=Glycine-rich RNA-binding protein 2, mitochondrial; Short=AtGR-RBP2; AltName: Full=AtRBG2; AltName: Full=Glycine-rich protein 2; Short=AtGRP2; AltName: Full=Mitochondrial RNA-binding protein 1a; Short=At-mRBP1a; Flags: Precursor	31	High-parental dominance	Low-parental dominance
novel.5955	CCG030364.1	NF-YA family protein	- && Q9C909.1 RecName: Full=Glycine-rich RNA-binding protein 5, mitochondrial; Short=AtGR-RBP5; AltName: Full=AtRBG5; AltName: Full=Mitochondrial RNA-binding protein 2b; Short=At-mRBP2b; Flags: Precursor && PF00076:RNA recognition motif. (a.k.a. RRM, RBD,	31	High-parental dominance	Low-parental dominance
novel.4334	Itr_sc000211.1_g00015.1	NF-YA family protein	- && P92555.1 RecName: Full=Uncharacterized mitochondrial protein AtMg01250; AltName: Full=ORF102 && -	31	High-parental dominance	High-parental dominance
gene-BC332_30955	Lus10031505	NF-YA family protein	hypothetical protein	31	High-parental dominance	High-parental dominance
novel.4528	Itr_sc000211.1_g00015.1	NF-YA family protein	- && - && -	31	High-parental dominance	High-parental dominance
novel.501	Itr_sc000211.1_g00015.1	NF-YA family protein	- && - && -	31	High-parental dominance	High-parental dominance
novel.740	Itr_sc000211.1_g00015.1	NF-YA family protein	- && P0C2F6.1 RecName: Full=Putate ribonuclease H protein At1g65750 && -	31	High-parental dominance	High-parental dominance
novel.5779	Itr_sc000211.1_g00015.1	NF-YA family protein	- && - && -	31	High-parental dominance	Additivity
gene-BC332_12035	Itr_sc000211.1_g00015.1	NF-YA family protein	hypothetical protein	31	Additivity	Low-parental dominance
novel.1720	Itr_sc000211.1_g00015.1	NF-YA family protein	- && - && -	31	Additivity	Additivity
novel.617	Itr_sc000211.1_g00015.1	NF-YA family protein	- && - && -	31	Additivity	Additivity
gene-BC332_05154	KZV22762.1	CAMTA family protein	putate protein phosphatase 2C 47	25	Under-dominance	Over-dominance
gene-BC332_26721	XP_011401233.1	CAMTA family protein	Triacylglycerol lipase SDP1L	25	Under-dominance	Over-dominance
gene-BC332_17495	TRIUR3_23792-P1	CAMTA family protein	putate 60S ribosomal protein L14	25	Under-dominance	Low-parental dominance
novel.3136	Spipo6G0049800	CAMTA family protein	- && Q84WM0.2 RecName: Full=60S ribosomal protein L29-2 && PF01779:Ribosomal L29e protein family	25	Under-dominance	Low-parental dominance
novel.7435	Achn001091	CAMTA family protein	- && K4D9Y4.1 RecName: Full=Acylsugar acyltransferase 3; Short=Sl-ASAT3 && PF02458:Transferase family	25	Under-dominance	Low-parental dominance
gene-BC332_13631	Pbr015154.1	CAMTA family protein	hypothetical protein	25	Under-dominance	High-parental dominance
novel.7719	Spipo6G0049800	CAMTA family protein	- && Q84WM0.2 RecName: Full=60S ribosomal protein L29-2 && PF01779:Ribosomal L29e protein family	25	Under-dominance	High-parental dominance
gene-BC332_00045	XP_016472343.1	CAMTA family protein	hypothetical protein	25	Over-dominance	Over-dominance
gene-BC332_00047	XP_016472343.1	CAMTA family protein	hypothetical protein	25	Over-dominance	Over-dominance
gene-BC332_16331	CCG020717.1	CAMTA family protein	hypothetical protein	25	Over-dominance	Over-dominance
gene-BC332_18819	XP_016472343.1	CAMTA family protein	hypothetical protein	25	Over-dominance	Over-dominance
gene-BC332_02335	676752474	CAMTA family protein	Peptidyl-prolyl cis-trans isomerase FKBP42	25	Over-dominance	Low-parental dominance
gene-BC332_09544	676752474	CAMTA family protein	hypothetical protein	25	Over-dominance	Low-parental dominance
gene-BC332_31576	XP_016472343.1	CAMTA family protein	hypothetical protein	25	Over-dominance	Low-parental dominance
gene-BC332_00038	XP_016472343.1	CAMTA family protein	hypothetical protein	25	Over-dominance	High-parental dominance
gene-BC332_00036	XP_016472343.1	CAMTA family protein	hypothetical protein	25	Over-dominance	High-parental dominance
gene-BC332_26363	ONHigh-parental dominanceA10G07200.4	CAMTA family protein	Serine/threonine-protein kinase CTR1	25	Over-dominance	High-parental dominance
gene-BC332_29781	676752474	CAMTA family protein	hypothetical protein	25	Over-dominance	High-parental dominance
gene-BC332_31570	Sme2.5_00225.1_g00014.1	CAMTA family protein	Serine--glyoxylate aminotransferase	25	Over-dominance	High-parental dominance
novel.3840	Sme2.5_05578.1_g00002.1	CAMTA family protein	- && - && -	25	Over-dominance	Additivity
gene-BC332_10965	Zmw_sc03263.1.g00150.1	CAMTA family protein	Multifunctional methyltransferase subunit-like protein	25	Low-parental dominance	Low-parental dominance
novel.7238	Achn001091	CAMTA family protein	- && Q70PR7.2 RecName: Full=Vinorine synthase && PF02458:Transferase family	25	Low-parental dominance	Low-parental dominance
gene-BC332_20823	Sme2.5_00225.1_g00014.1	CAMTA family protein	hypothetical protein	25	Low-parental dominance	High-parental dominance
gene-BC332_15109	Aradu.LJT36	CAMTA family protein	hypothetical protein	25	High-parental dominance	Additivity
gene-BC332_01420	Achn001091	CAMTA family protein	hypothetical protein	25	Additivity	Additivity
gene-BC332_02228	Sme2.5_00886.1_g00016.1	MIKC_MADS family protein	hypothetical protein	24	Under-dominance	Under-dominance
gene-BC332_04815	Zmw_sc05399.1.g00080.1	MIKC_MADS family protein	hypothetical protein	24	Under-dominance	Under-dominance
gene-BC332_08922	PH01001113G0580	MIKC_MADS family protein	60S ribosomal protein L27a	24	Under-dominance	Low-parental dominance
gene-BC332_25078	mrna24978.1-v1.0-hybrid	MIKC_MADS family protein	hypothetical protein	24	Under-dominance	Low-parental dominance
gene-BC332_21214	GSMUA_Achr9P13010_001	MIKC_MADS family protein	High affinity sulfate transporter 2	24	Under-dominance	Additivity
gene-BC332_07536	GSMUA_Achr9P13010_001	MIKC_MADS family protein	Sulfate transporter 3.1	24	Over-dominance	Over-dominance
gene-BC332_22626	Itr_sc000159.1_g00028.1	MIKC_MADS family protein	putate galacturonosyltransferase 3	24	Over-dominance	Over-dominance
gene-BC332_23572	Dca5233.1	MIKC_MADS family protein	hypothetical protein	24	Over-dominance	Over-dominance
gene-BC332_01323	Sme2.5_06058.1_g00001.1	MIKC_MADS family protein	MADS-box protein SOC1	24	Over-dominance	Low-parental dominance
gene-BC332_14255	GSMUA_Achr9P13010_001	MIKC_MADS family protein	putate sulfate transporter 4.2	24	Over-dominance	Low-parental dominance
gene-BC332_01320	Achn327221	MIKC_MADS family protein	Lysophospholipid acyltransferase LPEAT2	24	Over-dominance	High-parental dominance
gene-BC332_01321	CA01g19500	MIKC_MADS family protein	MADS-box transcription factor 56	24	Over-dominance	High-parental dominance
gene-BC332_15398	Zjn_sc00155.1.g00270.1.sm.mkhc	MIKC_MADS family protein	hypothetical protein	24	Over-dominance	High-parental dominance
gene-BC332_22603	676746044	MIKC_MADS family protein	hypothetical protein	24	Over-dominance	High-parental dominance
gene-BC332_06864	Zmw_sc06780.1.g00030.1	MIKC_MADS family protein	NAD(P)H-quinone oxidoreductase subunit N%2C chloroplastic	24	Low-parental dominance	Over-dominance
gene-BC332_22741	KHN16216.1	MIKC_MADS family protein	Iron-sulfur assembly protein IscA-like 1%2C mitochondrial	24	Low-parental dominance	Low-parental dominance
gene-BC332_01877	Niben101Scf06666g01011.1	MIKC_MADS family protein	Endoribonuclease Dicer -like protein 2	24	Low-parental dominance	High-parental dominance
gene-BC332_16567	GSBRNA2T00056321001	MIKC_MADS family protein	hypothetical protein	24	High-parental dominance	Over-dominance
gene-BC332_12552	Itr_sc000159.1_g00028.1	MIKC_MADS family protein	putate galacturonosyltransferase 4	24	High-parental dominance	High-parental dominance
gene-BC332_21213	GSMUA_Achr9P13010_001	MIKC_MADS family protein	Sulfate transporter 2.1	24	High-parental dominance	High-parental dominance
novel.5317	Dca5233.1	MIKC_MADS family protein	- && Q8W486.1 RecName: Full=Uncharacterized protein At1g04910 && PF00665:Integrase core domain|PF10250:GDP-fucose protein O-fucosyltransferase|PF13976:GAG-pre-integrase domain	24	High-parental dominance	High-parental dominance
gene-BC332_23231	PGSC0003DMP400031040	MIKC_MADS family protein	hypothetical protein	24	Additivity	Low-parental dominance
gene-BC332_24480	GSMUA_Achr9P13010_001	MIKC_MADS family protein	Sulfate transporter 3.2	24	Additivity	Additivity
gene-BC332_30962	XP_009619172.1	MIKC_MADS family protein	hypothetical protein	24	Additivity	Additivity
gene-BC332_21976	RrC264_p4	NF-YC family protein	Mitogen-actated protein kinase kinase kinase NPK1	24	Under-dominance	Under-dominance
gene-BC332_23246	Thecc1EG030078t1	NF-YC family protein	Histone H2A	24	Under-dominance	Under-dominance
gene-BC332_32078	Thecc1EG030078t1	NF-YC family protein	Histone H2A.2.2	24	Under-dominance	Under-dominance
gene-BC332_07281	Itr_sc000862.1_g00006.1	NF-YC family protein	Histone H2AX	24	Under-dominance	Low-parental dominance
gene-BC332_15664	Sopim06g016750.0.1	NF-YC family protein	hypothetical protein	24	Under-dominance	Low-parental dominance
gene-BC332_17610	Thecc1EG030078t1	NF-YC family protein	Histone H2AX	24	Under-dominance	Low-parental dominance
gene-BC332_22711	DCAR_007495	NF-YC family protein	hypothetical protein	24	Under-dominance	Low-parental dominance
gene-BC332_28557	Thecc1EG030078t1	NF-YC family protein	Histone H2A	24	Under-dominance	Low-parental dominance
gene-BC332_28558	Thecc1EG030078t1	NF-YC family protein	Histone H2A	24	Under-dominance	Low-parental dominance
gene-BC332_32073	Thecc1EG030078t1	NF-YC family protein	Histone H2A.2.2	24	Under-dominance	Low-parental dominance
gene-BC332_32076	Thecc1EG030078t1	NF-YC family protein	hypothetical protein	24	Under-dominance	Low-parental dominance
gene-BC332_12105	Zmw_sc00331.1.g00010.1	NF-YC family protein	Protein SPA%2C chloroplastic	24	Under-dominance	High-parental dominance
gene-BC332_28163	CA11g08790	NF-YC family protein	hypothetical protein	24	Under-dominance	Additivity
gene-BC332_11714	Achn296391	NF-YC family protein	hypothetical protein	24	Over-dominance	High-parental dominance
gene-BC332_25558	29656.m000483	NF-YC family protein	MLO-like protein 4	24	Over-dominance	High-parental dominance
gene-BC332_02279	Sme2.5_17281.1_g00001.1	NF-YC family protein	hypothetical protein	24	Over-dominance	Additivity
gene-BC332_07289	Itr_sc000862.1_g00006.1	NF-YC family protein	Histone H2AX	24	Low-parental dominance	Low-parental dominance
gene-BC332_06196	DCAR_007495	NF-YC family protein	hypothetical protein	24	Low-parental dominance	High-parental dominance
gene-BC332_26339	DCAR_007495	NF-YC family protein	hypothetical protein	24	Low-parental dominance	High-parental dominance
gene-BC332_08090	462943723	NF-YC family protein	F-box/LRR-repeat protein	24	High-parental dominance	Low-parental dominance
gene-BC332_33005	Sme2.5_01876.1_g00001.1	NF-YC family protein	hypothetical protein	24	High-parental dominance	Low-parental dominance
gene-BC332_10067	Thecc1EG030078t1	NF-YC family protein	Histone H2AX	24	High-parental dominance	Additivity
gene-BC332_10068	Thecc1EG030078t1	NF-YC family protein	putate histone H2AXa	24	Additivity	Additivity
gene-BC332_10818	Achn296391	NF-YC family protein	hypothetical protein	24	Additivity	Additivity
gene-BC332_23899	KN538727.1_FGP051	GeBP family protein	Thioredoxin M4%2C chloroplastic	23	Under-dominance	Over-dominance
gene-BC332_04322	Bradi5g00478.1.p	GeBP family protein	DNA replication licensing factor MCM3 -like protein 1	23	Under-dominance	Low-parental dominance
gene-BC332_27694	Araha.7890s0002.1.p	GeBP family protein	Alpha-1%2C4 glucan phosphorylase L isozyme%2C chloroplastic/amyloplastic	23	Under-dominance	Low-parental dominance
gene-BC332_29623	MDP0000284588	GeBP family protein	Glutamate decarboxylase 1	23	Under-dominance	Low-parental dominance
novel.1882	Sopen02g001310.1	GeBP family protein	- && Q93ZG9.1 RecName: Full=Peptidyl-prolyl cis-trans isomerase FKBP53; Short=PPIase FKBP53; AltName: Full=FK506-binding protein 53; Short=AtFKBP53; AltName: Full=Immunophilin FKBP53; AltName: Full=Rotamase && PF00254:FKBP-type peptidyl-prolyl cis-trans i	23	Under-dominance	Low-parental dominance
novel.3460	OMERI02G32430.4	GeBP family protein	- && Q9P775.1 RecName: Full=Uncharacterized WD repeat-containing protein C17D11.16 && -	23	Under-dominance	Low-parental dominance
gene-BC332_14475	676768160	GeBP family protein	Vestitone reductase	23	Under-dominance	High-parental dominance
gene-BC332_30862	Prupe.3G046700.1.p	GeBP family protein	ABC transporter F family member 5	23	Over-dominance	Over-dominance
novel.6604	OMERI02G32430.4	GeBP family protein	- && P43254.2 RecName: Full=E3 ubiquitin-protein ligase COP1; AltName: Full=Constitute photomorphogenesis protein 1 && PF00097:Zinc finger, C3HC4 type (RING finger)	23	Over-dominance	Over-dominance
gene-BC332_18419	FANhyb_rscf00000055.1.g00026.1	GeBP family protein	putate U-box domain-containing protein 42	23	Over-dominance	Low-parental dominance
gene-BC332_29700	Zmw_sc00505.1.g00370.1	GeBP family protein	Protein HVA22	23	Over-dominance	High-parental dominance
gene-BC332_05390	676768160	GeBP family protein	Dihydroflavonol-4-reductase	23	Over-dominance	High-parental dominance
gene-BC332_06833	FANhyb_rscf00000055.1.g00026.1	GeBP family protein	hypothetical protein	23	Over-dominance	High-parental dominance
gene-BC332_19065	EMT21109	GeBP family protein	putate tyrosine-protein phosphatase	23	Over-dominance	High-parental dominance
gene-BC332_19562	OMERI02G32430.4	GeBP family protein	hypothetical protein	23	Over-dominance	High-parental dominance
gene-BC332_23866	OMERI02G32430.4	GeBP family protein	Protein SPA1-RELATED 3	23	Over-dominance	High-parental dominance
novel.18	OMERI02G32430.4	GeBP family protein	- && Q9T014.2 RecName: Full=Protein SPA1-RELATED 2 && -	23	Over-dominance	High-parental dominance
gene-BC332_08527	MDP0000284588	GeBP family protein	Glutamate decarboxylase	23	Low-parental dominance	Over-dominance
gene-BC332_00539	Csa11g019380.1	GeBP family protein	hypothetical protein	23	Low-parental dominance	High-parental dominance
novel.5463	OMERI02G32430.4	GeBP family protein	- && Q9SYX2.1 RecName: Full=Protein SUPPRESSOR OF PHYA-105 1 && -	23	High-parental dominance	High-parental dominance
novel.414	Gh_D05G2144	GeBP family protein	- && - && -	23	Additivity	Low-parental dominance
novel.6072	MDP0000284588	GeBP family protein	- && P54767.1 RecName: Full=Glutamate decarboxylase; Short=GAD; AltName: Full=ERT D1 && PF00282:Pyridoxal-dependent decarboxylase conserved domain	23	Additivity	High-parental dominance
gene-BC332_01539	Araha.7890s0002.1.p	GeBP family protein	Alpha-1%2C4 glucan phosphorylase L isozyme%2C chloroplastic/amyloplastic	23	Additivity	Additivity
gene-BC332_19566	PH01001474G0470	HB-other family protein	Dynamin-related protein 5A	23	Under-dominance	Under-dominance
gene-BC332_02935	KZV22500.1	HB-other family protein	Xylulose 5-phosphate/phosphate translocator%2C chloroplastic	23	Under-dominance	Low-parental dominance
gene-BC332_26834	462849136	HB-other family protein	hypothetical protein	23	Under-dominance	Low-parental dominance
novel.5902	LOC_Os05g25600.1	HB-other family protein	- && Q9LNG5.1 RecName: Full=Serine/threonine-protein phosphatase 7 long form homolog && PF10536:Plant mobile domain	23	Under-dominance	Low-parental dominance
gene-BC332_13720	Sopim00g099580.0.1	HB-other family protein	Gamma-glutamyltranspeptidase 2	23	Under-dominance	High-parental dominance
novel.6499	OGLUM05G28390.1	HB-other family protein	- && Q9C5C0.4 RecName: Full=Mitogen-actated protein kinase 18; Short=AtMPK18; Short=MAP kinase 18 && PF00069:Protein kinase domain	23	Under-dominance	Additivity
gene-BC332_04523	CA02g15480	HB-other family protein	hypothetical protein	23	Over-dominance	Over-dominance
gene-BC332_19676	OGLUM05G28390.1	HB-other family protein	Mitogen-actated protein kinase 18	23	Over-dominance	Over-dominance
gene-BC332_07093	MDP0000288192	HB-other family protein	Glucose-6-phosphate/phosphate translocator 2%2C chloroplastic	23	Over-dominance	Low-parental dominance
gene-BC332_27921	XP_010106869.1	HB-other family protein	hypothetical protein	23	Over-dominance	Low-parental dominance
gene-BC332_33370	XP_010106869.1	HB-other family protein	hypothetical protein	23	Over-dominance	Low-parental dominance
gene-BC332_19546	XP_010106869.1	HB-other family protein	hypothetical protein	23	Over-dominance	High-parental dominance
gene-BC332_28776	TRIUR3_16344-P1	HB-other family protein	putate UDP-N-acetylglucosamine--peptide N-acetylglucosaminyltransferase SEC	23	Over-dominance	High-parental dominance
gene-BC332_13930	Zpz_sc04699.1.g00010.1.am.mk	HB-other family protein	Protein phosphatase 2C 3	23	Over-dominance	High-parental dominance
gene-BC332_10095	Aan017351	HB-other family protein	hypothetical protein	23	Over-dominance	Additivity
gene-BC332_26687	Cotton_A_09239_BGI-A2_v1.0	HB-other family protein	Calmodulin	23	Over-dominance	Additivity
gene-BC332_29850	Spipo3G0038700	HB-other family protein	PsbP domain-containing protein 7%2C chloroplastic	23	Low-parental dominance	Over-dominance
gene-BC332_05073	XP_010106869.1	HB-other family protein	hypothetical protein	23	Low-parental dominance	High-parental dominance
gene-BC332_05070	XP_010106869.1	HB-other family protein	hypothetical protein	23	High-parental dominance	Low-parental dominance
gene-BC332_15311	OGLUM05G28390.1	HB-other family protein	Mitogen-actated protein kinase -like protein NTF4	23	High-parental dominance	High-parental dominance
gene-BC332_23910	DCAR_019583	HB-other family protein	hypothetical protein	23	High-parental dominance	High-parental dominance
novel.607	XP_010106869.1	HB-other family protein	- && O82281.2 RecName: Full=Protein Brevis rad-like 1; Short=AtBRXL1 && -	23	High-parental dominance	Additivity
gene-BC332_04713	Ote100259360061	HB-other family protein	hypothetical protein	23	Additivity	Low-parental dominance
gene-BC332_14962	Aan019826	CO-like family protein	Histone H4	21	Under-dominance	Under-dominance
gene-BC332_14963	Aan019826	CO-like family protein	Histone H4	21	Under-dominance	Under-dominance
gene-BC332_17134	Aan019826	CO-like family protein	Histone H4	21	Under-dominance	Under-dominance
gene-BC332_17135	Aan019826	CO-like family protein	Histone H4	21	Under-dominance	Under-dominance
gene-BC332_29204	KZV16017.1	CO-like family protein	RuBisCO large subunit-binding protein subunit alpha%2C chloroplastic	21	Under-dominance	Under-dominance
gene-BC332_14964	Aan019826	CO-like family protein	Histone H4	21	Under-dominance	Low-parental dominance
gene-BC332_14965	Aan019826	CO-like family protein	Histone H4	21	Under-dominance	Low-parental dominance
gene-BC332_14966	Aan019826	CO-like family protein	Histone H4	21	Under-dominance	Low-parental dominance
gene-BC332_17147	Aan019826	CO-like family protein	Histone H4	21	Under-dominance	Low-parental dominance
gene-BC332_28571	Aan019826	CO-like family protein	Histone H4	21	Under-dominance	Low-parental dominance
gene-BC332_17971	PGSC0003DMP400047781	CO-like family protein	hypothetical protein	21	Under-dominance	High-parental dominance
gene-BC332_19483	Sme2.5_00580.1_g00006.1	CO-like family protein	hypothetical protein	21	Under-dominance	High-parental dominance
gene-BC332_07407	Sme2.5_00580.1_g00006.1	CO-like family protein	Somatic embryogenesis receptor kinase 1	21	Over-dominance	Over-dominance
gene-BC332_08429	Achn176481	CO-like family protein	Zinc finger protein CONSTANS-LIKE 5	21	Over-dominance	Low-parental dominance
gene-BC332_20966	Pbr026954.1	CO-like family protein	Chloride channel protein CLC-b	21	Over-dominance	High-parental dominance
gene-BC332_14143	CCG026078.1	CO-like family protein	hypothetical protein	21	Low-parental dominance	Low-parental dominance
gene-BC332_17150	Aan019826	CO-like family protein	Histone H4	21	Low-parental dominance	Low-parental dominance
gene-BC332_27422	Sme2.5_00580.1_g00006.1	CO-like family protein	Protein NSP-INTERACTING KINASE 1	21	High-parental dominance	High-parental dominance
gene-BC332_30052	AA31G00555	CO-like family protein	UDP-glycosyltransferase 86A1	21	High-parental dominance	High-parental dominance
gene-BC332_19478	Sme2.5_00580.1_g00006.1	CO-like family protein	hypothetical protein	21	High-parental dominance	High-parental dominance
novel.3155	CCG026078.1	CO-like family protein	- && Q8LPS2.1 RecName: Full=Protein ACCELERATED CELL DEATH 6 && -	21	Additivity	Low-parental dominance
gene-BC332_22397	Zpz_sc00083.1.g00290.1.am.mk	Dof family protein	hypothetical protein	21	Under-dominance	Under-dominance
gene-BC332_01445	maker-scaffold18721-augustus-gene-0.3-mRNA-1	Dof family protein	Metal tolerance protein 4	21	Under-dominance	Low-parental dominance
gene-BC332_05668	FANhyb_rscf00000146.1.g00010.1	Dof family protein	50S ribosomal protein L7/L12	21	Under-dominance	Low-parental dominance
gene-BC332_07609	Achn386081	Dof family protein	40S ribosomal protein S18	21	Under-dominance	Low-parental dominance
gene-BC332_16950	Achn386081	Dof family protein	40S ribosomal protein S18	21	Under-dominance	Low-parental dominance
gene-BC332_20105	Lsa000376	Dof family protein	Receptor-like protein kinase THESEUS 1	21	Under-dominance	Low-parental dominance
gene-BC332_30210	Achn386081	Dof family protein	40S ribosomal protein S18	21	Under-dominance	Low-parental dominance
gene-BC332_05932	FANhyb_rscf00000146.1.g00010.1	Dof family protein	50S ribosomal protein L12%2C chloroplastic	21	Under-dominance	High-parental dominance
gene-BC332_16930	Zpz_sc00083.1.g00290.1.am.mk	Dof family protein	hypothetical protein	21	Under-dominance	High-parental dominance
gene-BC332_32191	Zpz_sc00083.1.g00290.1.am.mk	Dof family protein	Hyoscyamine 6-dioxygenase	21	Under-dominance	High-parental dominance
novel.4166	Peinf101Scf01969g06011.1	Dof family protein	- && Q9C1X4.1 RecName: Full=Uncharacterized RING finger protein P32A8.03c && PF13639:Ring finger domain	21	Over-dominance	Over-dominance
gene-BC332_13690	CA05g08190	Dof family protein	hypothetical protein	21	Over-dominance	Over-dominance
gene-BC332_03822	CA02g01120	Dof family protein	hypothetical protein	21	Over-dominance	High-parental dominance
gene-BC332_27761	CA11g04250	Dof family protein	hypothetical protein	21	Over-dominance	High-parental dominance
gene-BC332_00755	Zpz_sc00083.1.g00290.1.am.mk	Dof family protein	hypothetical protein	21	Low-parental dominance	Over-dominance
gene-BC332_01608	Zpz_sc00083.1.g00290.1.am.mk	Dof family protein	hypothetical protein	21	Low-parental dominance	Low-parental dominance
gene-BC332_22571	Lsa000376	Dof family protein	putate receptor-like protein kinase	21	Low-parental dominance	Low-parental dominance
gene-BC332_33115	Zpz_sc00083.1.g00290.1.am.mk	Dof family protein	hypothetical protein	21	Low-parental dominance	High-parental dominance
gene-BC332_12786	Zpz_sc00083.1.g00290.1.am.mk	Dof family protein	1-aminocyclopropane-1-carboxylate oxidase -like protein 5	21	High-parental dominance	High-parental dominance
gene-BC332_19715	24922	Dof family protein	hypothetical protein	21	High-parental dominance	High-parental dominance
novel.5047	Achn337101	Dof family protein	- && Q9FLD7.1 RecName: Full=Beta-glucuronosyltransferase GlcAT14A; AltName: Full=GT14 family glucuronic acid transferase 1; Short=AtGlcAT14A && PF02485:Core-2/I-Branching enzyme	21	High-parental dominance	Additivity
novel.3939	KN539732.1_FGP002	E2F/DP family protein	- && Q9T041.2 RecName: Full=Microtubule-associated protein TORTIFOLIA1; AltName: Full=Microtubule-associated protein SPIRAL2; AltName: Full=Protein CONVOLUTA && -	19	Under-dominance	Under-dominance
novel.831	Tp57577_TGAC_v2_mRNA9953	E2F/DP family protein	- && - && PF05970:PIF1-like helicase	19	Under-dominance	Under-dominance
gene-BC332_28448	676787872	E2F/DP family protein	hypothetical protein	19	Under-dominance	Low-parental dominance
gene-BC332_32596	CA03g27290	E2F/DP family protein	E2F transcription factor-like E2FE	19	Under-dominance	Low-parental dominance
gene-BC332_33485	GSVHigh-parental dominanceT01007832001	E2F/DP family protein	hypothetical protein	19	Under-dominance	Low-parental dominance
gene-BC332_34696	ORUFI02G33610.1	E2F/DP family protein	2-oxoisovalerate dehydrogenase subunit alpha 2%2C mitochondrial	19	Under-dominance	Low-parental dominance
gene-BC332_25348	OPUNC10G09700.4	E2F/DP family protein	Cytochrome	19	Under-dominance	High-parental dominance
gene-BC332_13071	GRMZM2G351232_P01	E2F/DP family protein	Purple acid phosphatase 4	19	Over-dominance	Over-dominance
gene-BC332_03332	GRMZM5G829408_P01	E2F/DP family protein	Exosome complex exonuclease RRP46 -like protein	19	Over-dominance	High-parental dominance
novel.1875	XP_008245529.1	E2F/DP family protein	- && O00370.1 RecName: Full=LINE-1 retrotransposable element ORF2 protein; Short=ORF2p; Includes: RecName: Full=Reverse transcriptase; Includes: RecName: Full=Endonuclease && -	19	Over-dominance	High-parental dominance
gene-BC332_10555	GSBRNA2T00057732001	E2F/DP family protein	14-3-3-like protein	19	Low-parental dominance	Low-parental dominance
novel.1407	XP_008245529.1	E2F/DP family protein	- && - && -	19	High-parental dominance	Low-parental dominance
novel.5935	XP_008245529.1	E2F/DP family protein	- && - && -	19	High-parental dominance	Low-parental dominance
gene-BC332_31291	mrna08511.1-v1.0-hybrid	E2F/DP family protein	hypothetical protein	19	High-parental dominance	High-parental dominance
gene-BC332_06402	OPUNC10G09700.4	E2F/DP family protein	Cytochrome	19	High-parental dominance	Additivity
novel.2220	XP_008245529.1	E2F/DP family protein	- && P0C2F6.1 RecName: Full=Putate ribonuclease H protein At1g65750 && -	19	High-parental dominance	Additivity
novel.3730	XP_008245529.1	E2F/DP family protein	- && O00370.1 RecName: Full=LINE-1 retrotransposable element ORF2 protein; Short=ORF2p; Includes: RecName: Full=Reverse transcriptase; Includes: RecName: Full=Endonuclease && -	19	High-parental dominance	Additivity
novel.4317	Tp57577_TGAC_v2_mRNA9953	E2F/DP family protein	- && - && PF05970:PIF1-like helicase	19	High-parental dominance	Additivity
novel.4296	XP_008245529.1	E2F/DP family protein	- && P08548.1 RecName: Full=LINE-1 reverse transcriptase homolog && -	19	Additivity	Additivity
gene-BC332_03597	Neem_20193_f_2	BES1 family protein	hypothetical protein	18	Under-dominance	Under-dominance
novel.4089	Achn225931	BES1 family protein	- && Q9FKT5.1 RecName: Full=THO complex subunit 3; AltName: Full=TEX1 homolog; Short=AtTEX1 && -	18	Under-dominance	Under-dominance
gene-BC332_08188	Achn302621	BES1 family protein	60S ribosomal protein L36-2	18	Under-dominance	Low-parental dominance
gene-BC332_15371	Achn302621	BES1 family protein	60S ribosomal protein L36-2	18	Under-dominance	Low-parental dominance
gene-BC332_17017	ONHigh-parental dominanceA01G08700.1	BES1 family protein	Aquaporin TIP1-1	18	Under-dominance	Low-parental dominance
novel.4547	Niben101Scf10441g01004.1	BES1 family protein	- && - && -	18	Under-dominance	Low-parental dominance
gene-BC332_14987	Csa09g092790.1	BES1 family protein	Protein trichome birefringence-like 45	18	Under-dominance	High-parental dominance
gene-BC332_17955	676766192	BES1 family protein	Protein trichome birefringence-like 2	18	Under-dominance	High-parental dominance
gene-BC332_30652	Spipo1G0030700	BES1 family protein	Beta-amylase	18	Under-dominance	Additivity
gene-BC332_06595	Spipo1G0030700	BES1 family protein	Beta-amylase 1%2C chloroplastic	18	Over-dominance	Over-dominance
gene-BC332_09201	ONHigh-parental dominanceA01G08700.1	BES1 family protein	Aquaporin NIP3-1	18	Over-dominance	Over-dominance
gene-BC332_18938	Sobic.002G136200.2.p	BES1 family protein	hypothetical protein	18	Over-dominance	Over-dominance
gene-BC332_19951	MDP0000289260	BES1 family protein	hypothetical protein	18	Over-dominance	Low-parental dominance
novel.6964	Vang0300s00260.1	BES1 family protein	- && Q39962.1 RecName: Full=Citrate-binding protein; Flags: Precursor && -	18	Over-dominance	High-parental dominance
gene-BC332_17416	Csa09g092790.1	BES1 family protein	Protein trichome birefringence-like 45	18	Low-parental dominance	Low-parental dominance
gene-BC332_05196	Csa09g092790.1	BES1 family protein	Protein trichome birefringence-like 34	18	High-parental dominance	Additivity
gene-BC332_19458	676766192	BES1 family protein	Protein trichome birefringence-like 43	18	High-parental dominance	Additivity
novel.3022	Csa09g092790.1	BES1 family protein	- && Q9FGE9.1 RecName: Full=Protein trichome birefringence-like 12 && -	18	Additivity	Additivity
gene-BC332_28991	MDP0000266172	Nin-like family protein	hypothetical protein	16	Under-dominance	Under-dominance
gene-BC332_31157	Achn343181	Nin-like family protein	hypothetical protein	16	Under-dominance	Over-dominance
gene-BC332_09186	Achn385891	Nin-like family protein	hypothetical protein	16	Under-dominance	Low-parental dominance
novel.1126	XP_016436659.1	Nin-like family protein	- && - && -	16	Over-dominance	Under-dominance
gene-BC332_05352	XP_011400012.1	Nin-like family protein	hypothetical protein	16	Over-dominance	Over-dominance
gene-BC332_10974	MDP0000265619	Nin-like family protein	ABC transporter G family member 25	16	Over-dominance	Over-dominance
gene-BC332_33412	CA06g10820	Nin-like family protein	hypothetical protein	16	Over-dominance	Over-dominance
gene-BC332_04761	Zjn_sc00010.1.g03070.1.am.mk	Nin-like family protein	hypothetical protein	16	Over-dominance	High-parental dominance
gene-BC332_05028	estExt_fgenesh1_pg.C_50254	Nin-like family protein	Nucleolar complex protein 2 -like protein	16	Low-parental dominance	Low-parental dominance
novel.7262	CA00g79730	Nin-like family protein	- && Q84TH9.2 RecName: Full=Protein NLP7; Short=AtNLP7; AltName: Full=NIN-like protein 7; AltName: Full=Nodule inception protein-like protein 7 && -	16	Low-parental dominance	High-parental dominance
gene-BC332_05176	Achn343181	Nin-like family protein	Catalase isozyme 2	16	High-parental dominance	High-parental dominance
gene-BC332_32045	CA00g79730	Nin-like family protein	hypothetical protein	16	High-parental dominance	High-parental dominance
gene-BC332_04688	CA01g34600	Nin-like family protein	Ureidoglycolate hydrolase	16	Additivity	High-parental dominance
gene-BC332_06538	PGSC0003DMP400051646	Nin-like family protein	hypothetical protein	16	Additivity	High-parental dominance
gene-BC332_12423	Brast07G082700.1.p	Nin-like family protein	hypothetical protein	16	Additivity	High-parental dominance
novel.7544	Zpz_sc00135.1.g00200.1.am.mk	Nin-like family protein	- && Q3ZPN4.1 RecName: Full=Methanol O-anthraniloyltransferase; AltName: Full=Anthraniloyl-CoA:methanol acyltransferase; AltName: Full=Benzyl alcohol O-benzoyltransferase && PF02458:Transferase family	16	Additivity	High-parental dominance
gene-BC332_02526	KFK43895.1	STAT family protein	hypothetical protein	16	Under-dominance	Additivity
gene-BC332_19708	676709864	STAT family protein	Gibberellin 2-beta-dioxygenase 1	16	Over-dominance	Over-dominance
gene-BC332_17724	mrna27137.1-v1.0-hybrid	STAT family protein	Leucine-rich repeat receptor-like serine/threonine/tyrosine-protein kinase SOBIR1	16	Over-dominance	Over-dominance
gene-BC332_19066	676709864	STAT family protein	1-aminocyclopropane-1-carboxylate oxidase 4	16	Over-dominance	Over-dominance
gene-BC332_33654	AA31G00726	STAT family protein	1-aminocyclopropane-1-carboxylate oxidase	16	Over-dominance	Over-dominance
gene-BC332_30943	Gh_D11G2978	STAT family protein	Purine permease 2	16	Over-dominance	Low-parental dominance
gene-BC332_02771	676709864	STAT family protein	hypothetical protein	16	Over-dominance	High-parental dominance
gene-BC332_05082	676709864	STAT family protein	1-aminocyclopropane-1-carboxylate oxidase	16	Over-dominance	High-parental dominance
gene-BC332_19709	676709864	STAT family protein	Gibberellin 2-beta-dioxygenase 1	16	Over-dominance	High-parental dominance
gene-BC332_25006	676709864	STAT family protein	Gibberellin 2-beta-dioxygenase 1	16	Over-dominance	High-parental dominance
gene-BC332_10001	Csa09g092630.1	STAT family protein	Uroporphyrinogen-III synthase%2C chloroplastic	16	Low-parental dominance	High-parental dominance
gene-BC332_24409	676709864	STAT family protein	1-aminocyclopropane-1-carboxylate oxidase -like protein	16	High-parental dominance	Low-parental dominance
novel.3572	AA31G00726	STAT family protein	- && Q3L181.1 RecName: Full=Perakine reductase && -	16	High-parental dominance	Low-parental dominance
gene-BC332_18090	Gh_D11G2978	STAT family protein	putate purine permease 5	16	High-parental dominance	High-parental dominance
gene-BC332_24017	676709864	STAT family protein	1-aminocyclopropane-1-carboxylate oxidase	16	High-parental dominance	High-parental dominance
novel.4326	676709864	STAT family protein	- && Q9FLV0.1 RecName: Full=Protein DOWNY MILDEW RESISTANCE 6; Short=AtDMR6; AltName: Full=2-oxoglutarate (2OG)-Fe(II) oxygenase-like protein DMR6; AltName: Full=Salicylate 3-hydroxylase DMR6; Short=S3H DMR6; Short=SA 3-hydroxylase DMR6; Short=Salicylic a	16	Additivity	Additivity
gene-BC332_15000	Araip.EM5UC	TALE family protein	Ras-related protein Rab2BV	14	Under-dominance	Low-parental dominance
gene-BC332_05928	GSMUA_Achr10P22520_001	TALE family protein	Protein NRT1/ PTR FAMILY 5.9	14	Over-dominance	Over-dominance
gene-BC332_18164	CA07g02810	TALE family protein	Homeobox protein knotted-1-like 3	14	Over-dominance	Over-dominance
gene-BC332_09642	mrna02674.1-v1.0-hybrid	TALE family protein	Inorganic pyrophosphatase 1	14	Over-dominance	Low-parental dominance
gene-BC332_24458	Araip.EM5UC	TALE family protein	GTP-binding nuclear protein Ran1	14	Over-dominance	Low-parental dominance
novel.6944	mrna32207.1-v1.0-hybrid	TALE family protein	- && Q9CAL3.1 RecName: Full=Cysteine-rich receptor-like protein kinase 2; Short=Cysteine-rich RLK2; Flags: Precursor && -	14	Over-dominance	Low-parental dominance
[truncated: 148 more rows]
